# Supplementary material for: Comparative Analyses of Base Compositions, DNA Sizes, and Dinucleotide Frequency Profiles in Archaeal and Bacterial Chromosomes and Plasmids
Source: PubMed Central journal article supplement (PMC3321278; doi:10.1155/2012/342482), 2012-03-26
Supplement: 342482.f1.pdf [file 342482.f1.pdf]

Supplementary Table S1. Pairs of chromosome and plasmid in bacteria.

| Organism                       | Chromosome GC % | Chromosome size (bp) | Plasmid                                      | Plasmid GC % | Plasmid size (bp) |
|--------------------------------|-----------------|----------------------|----------------------------------------------|--------------|-------------------|
| 'Nostoc azollae' 0708          | 38.4            | 5354700              | 'Nostoc azollae' 0708 plasmid pAzo01         | 35.7         | 109570            |
| 'Nostoc azollae' 0708          | 38.4            | 5354700              | 'Nostoc azollae' 0708 plasmid pAzo02         | 33.5         | 21875             |
| Acaryochloris marina MBIC11017 | 47.3            | 6503724              | Acaryochloris marina MBIC11017 plasmid pREB1 | 47.3         | 374161            |
| Acaryochloris marina MBIC11017 | 47.3            | 6503724              | Acaryochloris marina MBIC11017 plasmid pREB2 | 45.3         | 356087            |
| Acaryochloris marina MBIC11017 | 47.3            | 6503724              | Acaryochloris marina MBIC11017 plasmid pREB3 | 45.2         | 273121            |
| Acaryochloris marina MBIC11017 | 47.3            | 6503724              | Acaryochloris marina MBIC11017 plasmid pREB4 | 45.9         | 226680            |
| Acaryochloris marina MBIC11017 | 47.3            | 6503724              | Acaryochloris marina MBIC11017 plasmid pREB5 | 44.7         | 177162            |
| Acaryochloris marina MBIC11017 | 47.3            | 6503724              | Acaryochloris marina MBIC11017 plasmid pREB6 | 47.1         | 172728            |
| Acaryochloris marina MBIC11017 | 47.3            | 6503724              | Acaryochloris marina MBIC11017 plasmid pREB7 | 45.6         | 155110            |
| Acaryochloris marina MBIC11017 | 47.3            | 6503724              | Acaryochloris marina MBIC11017 plasmid pREB8 | 45.4         | 120693            |
| Acaryochloris marina MBIC11017 | 47.3            | 6503724              | Acaryochloris marina MBIC11017 plasmid pREB9 | 42.5         | 2133              |

|                                |      |         |                                            |      |        |
|--------------------------------|------|---------|--------------------------------------------|------|--------|
| Achromobacter xylosoxidans A8  | 66   | 7013095 | Achromobacter xylosoxidans A8 plasmid pA81 | 62.2 | 98156  |
| Achromobacter xylosoxidans A8  | 66   | 7013095 | Achromobacter xylosoxidans A8 plasmid pA82 | 61.3 | 247895 |
| Acidiphilium cryptum JF-5      | 68   | 3389227 | Acidiphilium cryptum JF-5 plasmid pACRY01  | 62.3 | 203589 |
| Acidiphilium cryptum JF-5      | 68   | 3389227 | Acidiphilium cryptum JF-5 plasmid pACRY02  | 61.9 | 187422 |
| Acidiphilium cryptum JF-5      | 68   | 3389227 | Acidiphilium cryptum JF-5 plasmid pACRY03  | 62.1 | 88953  |
| Acidiphilium cryptum JF-5      | 68   | 3389227 | Acidiphilium cryptum JF-5 plasmid pACRY04  | 59.6 | 37415  |
| Acidiphilium cryptum JF-5      | 68   | 3389227 | Acidiphilium cryptum JF-5 plasmid pACRY05  | 60.9 | 37155  |
| Acidiphilium cryptum JF-5      | 68   | 3389227 | Acidiphilium cryptum JF-5 plasmid pACRY06  | 61   | 8781   |
| Acidiphilium cryptum JF-5      | 68   | 3389227 | Acidiphilium cryptum JF-5 plasmid pACRY07  | 57.5 | 5629   |
| Acidiphilium cryptum JF-5      | 68   | 3389227 | Acidiphilium cryptum JF-5 plasmid pACRY08  | 58.7 | 4909   |
| Acidiphilium multivorum AIU301 | 67.6 | 3749411 | Acidiphilium multivorum AIU301             | 62.9 | 271573 |
| Acidiphilium multivorum AIU301 | 67.6 | 3749411 | Acidiphilium multivorum AIU301             | 61.9 | 65564  |
| Acidiphilium multivorum AIU301 | 67.6 | 3749411 | Acidiphilium multivorum AIU301             | 61.2 | 54248  |
| Acidiphilium multivorum AIU301 | 67.6 | 3749411 | Acidiphilium multivorum AIU301             | 60   | 40588  |
| Acidiphilium multivorum AIU301 | 67.6 | 3749411 | Acidiphilium multivorum AIU301             | 58.9 | 14328  |
| Acidiphilium multivorum AIU301 | 67.6 | 3749411 | Acidiphilium multivorum AIU301             | 59.6 | 12125  |

|                                       |      |         |                                                       |      |        |
|---------------------------------------|------|---------|-------------------------------------------------------|------|--------|
| Acidiphilium<br>multivorum AIU301     | 67.6 | 3749411 | Acidiphilium<br>multivorum AIU301                     | 57.6 | 5178   |
| Acidiphilium<br>multivorum AIU301     | 67.6 | 3749411 | Acidiphilium<br>multivorum AIU301                     | 60.9 | 1729   |
| Acidobacterium sp.<br>MP5ACTX9        | 60.5 | 4309153 | Acidobacterium sp.<br>MP5ACTX9 plasmid<br>pACIX901    | 59.6 | 475658 |
| Acidobacterium sp.<br>MP5ACTX9        | 60.5 | 4309153 | Acidobacterium sp.<br>MP5ACTX9 plasmid<br>pACIX902    | 59.4 | 300292 |
| Acidobacterium sp.<br>MP5ACTX9        | 60.5 | 4309153 | Acidobacterium sp.<br>MP5ACTX9 plasmid<br>pACIX903    | 55.9 | 188167 |
| Acidobacterium sp.<br>MP5ACTX9        | 60.5 | 4309153 | Acidobacterium sp.<br>MP5ACTX9 plasmid<br>pACIX904    | 53.3 | 115493 |
| Acidobacterium sp.<br>MP5ACTX9        | 60.5 | 4309153 | Acidobacterium sp.<br>MP5ACTX9 plasmid<br>pACIX905    | 56.4 | 115221 |
| Acidovorax sp. JS42                   | 66.2 | 4448856 | Acidovorax sp. JS42<br>plasmid pAOVO01                | 62.2 | 72689  |
| Acidovorax sp. JS42                   | 66.2 | 4448856 | Acidovorax sp. JS42<br>plasmid pAOVO02                | 64.6 | 63609  |
| Acinetobacter<br>baumannii AB0057     | 39.2 | 4050513 | Acinetobacter<br>baumannii AB0057                     | 34.4 | 8729   |
| Acinetobacter<br>baumannii ACICU      | 39   | 3904116 | Acinetobacter<br>baumannii ACICU<br>plasmid pACICU1   | 37.8 | 28279  |
| Acinetobacter<br>baumannii ACICU      | 39   | 3904116 | Acinetobacter<br>baumannii ACICU<br>plasmid pACICU2   | 33.4 | 64366  |
| Acinetobacter<br>baumannii ATCC 17978 | 38.9 | 3976747 | Acinetobacter<br>baumannii ATCC 17978<br>plasmid pAB1 | 36.2 | 13408  |

|                                                     |      |         |                                                                    |      |        |
|-----------------------------------------------------|------|---------|--------------------------------------------------------------------|------|--------|
| Acinetobacter baumannii ATCC 17978                  | 38.9 | 3976747 | Acinetobacter baumannii ATCC 17978                                 | 35.2 | 11302  |
| Acinetobacter baumannii AYE                         | 39.4 | 3936291 | Acinetobacter baumannii plasmid                                    | 34.5 | 5644   |
| Acinetobacter baumannii AYE                         | 39.4 | 3936291 | Acinetobacter baumannii plasmid                                    | 34.4 | 9661   |
| Acinetobacter baumannii AYE                         | 39.4 | 3936291 | Acinetobacter baumannii plasmid                                    | 37.5 | 94413  |
| Acinetobacter baumannii AYE                         | 39.4 | 3936291 | Acinetobacter baumannii plasmid                                    | 37.6 | 2726   |
| Acinetobacter baumannii SDF                         | 39.2 | 3421954 | Acinetobacter baumannii plasmid                                    | 34.5 | 6106   |
| Acinetobacter baumannii SDF                         | 39.2 | 3421954 | Acinetobacter baumannii plasmid                                    | 34.9 | 25014  |
| Acinetobacter baumannii SDF                         | 39.2 | 3421954 | Acinetobacter baumannii plasmid                                    | 34.4 | 24922  |
| Actinobacillus pleuropneumoniae serovar 7 str. AP76 | 41.2 | 2331981 | Actinobacillus pleuropneumoniae serovar 7 str. AP76 plasmid APP7 A | 41.5 | 5685   |
| Actinobacillus pleuropneumoniae serovar 7 str. AP76 | 41.2 | 2331981 | Actinobacillus pleuropneumoniae serovar 7 str. AP76 plasmid ABB7 B | 48.1 | 4236   |
| Actinobacillus pleuropneumoniae serovar 7 str. AP76 | 41.2 | 2331981 | Actinobacillus pleuropneumoniae serovar 7 str. AP76 plasmid APP7 C | 41.7 | 3533   |
| Agrobacterium radiobacter K84                       | 60.3 | 4005130 | Agrobacterium radiobacter K84 plasmid                              | 57   | 388169 |
| Agrobacterium radiobacter K84                       | 60.3 | 4005130 | Agrobacterium radiobacter K84 plasmid                              | 59   | 184668 |
| Agrobacterium radiobacter K84                       | 60.3 | 4005130 | Agrobacterium radiobacter K84 plasmid                              | 53.5 | 44420  |

|                                     |      |         |                                            |      |        |
|-------------------------------------|------|---------|--------------------------------------------|------|--------|
| Agrobacterium radiobacter K84       | 59.8 | 2650913 | Agrobacterium radiobacter K84 plasmid      | 57   | 388169 |
| Agrobacterium radiobacter K84       | 59.8 | 2650913 | Agrobacterium radiobacter K84 plasmid      | 59   | 184668 |
| Agrobacterium radiobacter K84       | 59.8 | 2650913 | Agrobacterium radiobacter K84 plasmid      | 53.5 | 44420  |
| Agrobacterium sp. H13-3             | 58.8 | 2823930 | Agrobacterium sp. H13-3 plasmid pAspH13-3a | 57.4 | 601551 |
| Agrobacterium vitis S4              | 57.7 | 3726375 | Agrobacterium vitis S4 plasmid pTiS4       | 56.7 | 258824 |
| Agrobacterium vitis S4              | 57.7 | 3726375 | Agrobacterium vitis S4 plasmid pAtS4a      | 56.8 | 78730  |
| Agrobacterium vitis S4              | 57.7 | 3726375 | Agrobacterium vitis S4 plasmid pAtS4b      | 56.2 | 130435 |
| Agrobacterium vitis S4              | 57.7 | 3726375 | Agrobacterium vitis S4 plasmid pAtS4c      | 58.6 | 211620 |
| Agrobacterium vitis S4              | 57.7 | 3726375 | Agrobacterium vitis S4 plasmid pAtS4e      | 56.6 | 631775 |
| Agrobacterium vitis S4 chromosome 2 | 57.5 | 1283187 | Agrobacterium vitis S4 plasmid pTiS4       | 56.7 | 258824 |
| Agrobacterium vitis S4 chromosome 2 | 57.5 | 1283187 | Agrobacterium vitis S4 plasmid pAtS4a      | 56.8 | 78730  |
| Agrobacterium vitis S4 chromosome 2 | 57.5 | 1283187 | Agrobacterium vitis S4 plasmid pAtS4b      | 56.2 | 130435 |
| Agrobacterium vitis S4 chromosome 2 | 57.5 | 1283187 | Agrobacterium vitis S4 plasmid pAtS4c      | 58.6 | 211620 |
| Agrobacterium vitis S4 chromosome 2 | 57.5 | 1283187 | Agrobacterium vitis S4 plasmid pAtS4e      | 56.6 | 631775 |
| Alicyclophilus denitrificans BC     | 68.3 | 4637013 | Alicyclophilus denitrificans BC            | 58.3 | 119718 |
| Alicyclophilus denitrificans BC     | 68.3 | 4637013 | Alicyclophilus denitrificans BC            | 64.4 | 78982  |
| Alicyclophilus denitrificans K601   | 68   | 4995263 | Alicyclophilus denitrificans K601          | 62.2 | 75488  |

|                                                                        |      |         |                                                                                                             |      |       |
|------------------------------------------------------------------------|------|---------|-------------------------------------------------------------------------------------------------------------|------|-------|
| Alicyclobacillus<br>acidocaldarius subsp.<br>acidocaldarius DSM<br>446 | 62.3 | 3018755 | Alicyclobacillus<br>acidocaldarius subsp.<br>acidocaldarius DSM<br>446 plasmid pAACI01<br>/Alicyclobacillus | 54.1 | 91726 |
| Alicyclobacillus<br>acidocaldarius subsp.<br>acidocaldarius DSM<br>446 | 62.3 | 3018755 | acidocaldarius subsp.<br>acidocaldarius DSM<br>446 plasmid pAACI02<br>/Alicyclobacillus                     | 43.5 | 64508 |
| Alicyclobacillus<br>acidocaldarius subsp.<br>acidocaldarius DSM<br>446 | 62.3 | 3018755 | acidocaldarius subsp.<br>acidocaldarius DSM<br>446 plasmid pAACI03                                          | 43.5 | 64508 |
| Aliivibrio salmonicida<br>LFI1238 chromosome 1                         | 39.2 | 3325165 | Aliivibrio salmonicida<br>LFI1238 plasmid<br>pVSAL320                                                       | 37.3 | 30807 |
| Aliivibrio salmonicida<br>LFI1238 chromosome 1                         | 39.2 | 3325165 | Aliivibrio salmonicida<br>LFI1238 plasmid<br>pVSAL54                                                        | 38.1 | 5360  |
| Aliivibrio salmonicida<br>LFI1238 chromosome 1                         | 39.2 | 3325165 | Aliivibrio salmonicida<br>LFI1238 plasmid<br>pVSAL43                                                        | 35.6 | 4327  |
| Aliivibrio salmonicida<br>LFI1238 chromosome 2                         | 38.2 | 1206461 | Aliivibrio salmonicida<br>LFI1238 plasmid<br>pVSAL320                                                       | 37.3 | 30807 |
| Aliivibrio salmonicida<br>LFI1238 chromosome 2                         | 38.2 | 1206461 | Aliivibrio salmonicida<br>LFI1238 plasmid<br>pVSAL54                                                        | 38.1 | 5360  |
| Aliivibrio salmonicida<br>LFI1238 chromosome 2                         | 38.2 | 1206461 | Aliivibrio salmonicida<br>LFI1238 plasmid<br>pVSAL43                                                        | 35.6 | 4327  |
| Aliivibrio salmonicida<br>LFI1238 chromosome                           | 40.1 | 83540   | Aliivibrio salmonicida<br>LFI1238 plasmid<br>pVSAL320                                                       | 37.3 | 30807 |

|                                              |      |         |                                                          |      |        |
|----------------------------------------------|------|---------|----------------------------------------------------------|------|--------|
| Aliivibrio salmonicida<br>LFI1238 chromosome | 40.1 | 83540   | Aliivibrio salmonicida<br>LFI1238 plasmid<br>pVSAL54     | 38.1 | 5360   |
| Aliivibrio salmonicida<br>LFI1238 chromosome | 40.1 | 83540   | Aliivibrio salmonicida<br>LFI1238 plasmid<br>pVSAL43     | 35.6 | 4327   |
| Allochrochmatium<br>vinosum DSM 180          | 64.4 | 3526903 | Allochrochmatium<br>vinosum DSM 180<br>plasmid pALVIN01  | 61.9 | 102242 |
| Allochrochmatium<br>vinosum DSM 180          | 64.4 | 3526903 | Allochrochmatium<br>vinosum DSM 180<br>plasmid pALVIN02  | 53.5 | 39929  |
| Ammonifex degensii<br>KC4                    | 59.4 | 2129237 | Ammonifex degensii<br>KC4 plasmid pADEG01                | 60.7 | 27830  |
| Amycolicococcus<br>subflavus DQS3-9A1        | 62.2 | 4738809 | Amycolicococcus<br>subflavus DQS3-9A1<br>plasmid pAS9A-1 | 63.9 | 17897  |
| Amycolicococcus<br>subflavus DQS3-9A1        | 62.2 | 4738809 | Amycolicococcus<br>subflavus DQS3-9A1<br>plasmid pAS9A-2 | 61.9 | 106784 |
| Anabaena variabilis<br>ATCC 29413            | 46.5 | 37151   | Anabaena variabilis<br>ATCC 29413 plasmid A              | 40.5 | 366354 |
| Anabaena variabilis<br>ATCC 29413            | 46.5 | 37151   | Anabaena variabilis<br>ATCC 29413 plasmid B              | 38.5 | 35762  |
| Anabaena variabilis<br>ATCC 29413            | 46.5 | 37151   | Anabaena variabilis<br>ATCC 29413 plasmid C              | 42   | 300758 |
| Anabaena variabilis<br>ATCC 29413            | 41.4 | 6365727 | Anabaena variabilis<br>ATCC 29413 plasmid A              | 40.5 | 366354 |
| Anabaena variabilis<br>ATCC 29413            | 41.4 | 6365727 | Anabaena variabilis<br>ATCC 29413 plasmid B              | 38.5 | 35762  |
| Anabaena variabilis<br>ATCC 29413            | 41.4 | 6365727 | Anabaena variabilis<br>ATCC 29413 plasmid C              | 42   | 300758 |
| Anaerocellum<br>thermophilum DSM<br>6725     | 35.2 | 2919718 | Anaerocellum<br>thermophilum DSM<br>6725 plasmid pATHE01 | 38.5 | 8291   |

|                                       |      |         |                                                    |      |        |
|---------------------------------------|------|---------|----------------------------------------------------|------|--------|
| Anaerocellum thermophilum DSM 6725    | 35.2 | 2919718 | Anaerocellum thermophilum DSM 6725 plasmid pATHE02 | 42.9 | 3653   |
| Anaerococcus prevotii DSM 20548       | 36.1 | 1883067 | Anaerococcus prevotii DSM 20548 plasmid pAPRE01    | 28.6 | 115566 |
| Aquifex aeolicus                      | 43.5 | 1551335 | Aquifex aeolicus plasmid ece1                      | 36.4 | 39456  |
| Arthrobacter arilaitensis Re117       | 59.3 | 3859257 | Arthrobacter arilaitensis Re117 plasmid pRE117-    | 58.8 | 50407  |
| Arthrobacter arilaitensis Re117       | 59.3 | 3859257 | Arthrobacter arilaitensis plasmid pRE117-2         | 55.5 | 8528   |
| Arthrobacter aurescens TC1            | 62.3 | 4597686 | Arthrobacter aurescens TC1 plasmid TC1             | 64.6 | 328237 |
| Arthrobacter aurescens TC1            | 62.3 | 4597686 | Arthrobacter aurescens TC1 plasmid TC2             | 61.3 | 300725 |
| Arthrobacter chlorophenolicus A6      | 66.3 | 4395537 | Arthrobacter chlorophenolicus A6 plasmid pACHL01   | 64.4 | 426858 |
| Arthrobacter chlorophenolicus A6      | 66.3 | 4395537 | Arthrobacter chlorophenolicus A6 plasmid pACHL02   | 61.3 | 158475 |
| Arthrobacter phenanthrenivorans Sphe3 | 65.6 | 4250414 | Arthrobacter phenanthrenivorans Sphe3 plasmid      | 62   | 190450 |
| Arthrobacter phenanthrenivorans Sphe3 | 65.6 | 4250414 | Arthrobacter phenanthrenivorans Sphe3 plasmid      | 62.4 | 94456  |
| Arthrobacter sp. FB24                 | 65.5 | 4698945 | Arthrobacter sp. FB24 plasmid 1                    | 65   | 159538 |
| Arthrobacter sp. FB24                 | 65.5 | 4698945 | Arthrobacter sp. FB24 plasmid 2                    | 63.3 | 115507 |
| Arthrobacter sp. FB24                 | 65.5 | 4698945 | Arthrobacter sp. FB24 plasmid 3                    | 64.7 | 96488  |



|                                              |      |         |                                                                |      |         |
|----------------------------------------------|------|---------|----------------------------------------------------------------|------|---------|
| Aster yellows witches-broom phytoplasma AYWB | 26.9 | 706569  | Aster yellows witches-broom phytoplasma AYWB plasmid pAYWB-I   | 25.6 | 3972    |
| Aster yellows witches-broom phytoplasma AYWB | 26.9 | 706569  | Aster yellows witches-broom phytoplasma AYWB plasmid pAYWB-II  | 23.9 | 4009    |
| Aster yellows witches-broom phytoplasma AYWB | 26.9 | 706569  | Aster yellows witches-broom phytoplasma AYWB plasmid pAYWB-III | 21.8 | 5104    |
| Aster yellows witches-broom phytoplasma AYWB | 26.9 | 706569  | Aster yellows witches-broom phytoplasma AYWB plasmid pAYWB-IV  | 24.4 | 4316    |
| Asticcacaulis excentricus CB 48              | 59.2 | 2588221 | Asticcacaulis excentricus CB 48                                | 59.8 | 244260  |
| Asticcacaulis excentricus CB 48              | 59.2 | 2588221 | Asticcacaulis excentricus CB 48                                | 57.3 | 160346  |
| Asticcacaulis excentricus CB 48              | 60.4 | 1315949 | Asticcacaulis excentricus CB 48                                | 59.8 | 244260  |
| Asticcacaulis excentricus CB 48              | 60.4 | 1315949 | Asticcacaulis excentricus CB 48                                | 57.3 | 160346  |
| Azospirillum sp. B510                        | 67.8 | 3311395 | Azospirillum sp. B510 plasmid pAB510a                          | 67.6 | 1455109 |
| Azospirillum sp. B510                        | 67.8 | 3311395 | Azospirillum sp. B510 plasmid pAB510b                          | 67.5 | 723779  |
| Azospirillum sp. B510                        | 67.8 | 3311395 | Azospirillum sp. B510 plasmid pAB510c                          | 67.4 | 681723  |
| Azospirillum sp. B510                        | 67.8 | 3311395 | Azospirillum sp. B510 plasmid pAB510d                          | 68   | 628837  |
| Azospirillum sp. B510                        | 67.8 | 3311395 | Azospirillum sp. B510 plasmid pAB510e                          | 67.5 | 537299  |

|                                      |      |         |                                                 |      |        |
|--------------------------------------|------|---------|-------------------------------------------------|------|--------|
| Azospirillum sp. B510                | 67.8 | 3311395 | Azospirillum sp. B510<br>plasmid pAB510f        | 65.9 | 261596 |
| Bacillus anthracis CI                | 35.4 | 5196054 | Bacillus anthracis CI<br>plasmid pCI-XO1        | 32.5 | 181907 |
| Bacillus anthracis CI                | 35.4 | 5196054 | Bacillus anthracis CI<br>plasmid pCI-XO2        | 33.1 | 94469  |
| Bacillus anthracis CI                | 35.4 | 5196054 | Bacillus anthracis CI<br>plasmid pBAslCI14      | 37.9 | 14219  |
| Bacillus anthracis str.<br>A0248     | 35.4 | 5227419 | Bacillus anthracis str.<br>A0248 plasmid pXO1   | 32.5 | 181677 |
| Bacillus anthracis str.<br>A0248     | 35.4 | 5227419 | Bacillus anthracis str.<br>A0248 plasmid pXO2   | 33   | 94830  |
| Bacillus anthracis str.<br>Ames 0581 | 35.4 | 5227419 | Bacillus anthracis str.<br>Ames 0581 plasmid    | 32.5 | 181677 |
| Bacillus anthracis str.<br>Ames 0581 | 35.4 | 5227419 | Bacillus anthracis str.<br>Ames 0581 plasmid    | 33   | 94830  |
| Bacillus anthracis str.<br>CDC 684   | 35.4 | 5230115 | Bacillus anthracis str.<br>CDC 684 plasmid pX01 | 32.5 | 181773 |
| Bacillus anthracis str.<br>CDC 684   | 35.4 | 5230115 | Bacillus anthracis str.<br>CDC 684 plasmid pX02 | 33.1 | 94875  |
| Bacillus cereus<br>03BB102           | 35.4 | 5269628 | Bacillus cereus<br>03BB102 plasmid              | 32.2 | 179680 |
| Bacillus cereus AH187                | 35.6 | 5269030 | Bacillus cereus AH187<br>plasmid pAH187 12      | 31.1 | 12481  |
| Bacillus cereus AH187                | 35.6 | 5269030 | Bacillus cereus AH187<br>plasmid pAH187 270     | 34.2 | 270082 |
| Bacillus cereus AH187                | 35.6 | 5269030 | Bacillus cereus AH187<br>plasmid pAH187 45      | 35.5 | 45173  |
| Bacillus cereus AH187                | 35.6 | 5269030 | Bacillus cereus AH187<br>plasmid pAH187 3       | 34.9 | 3091   |
| Bacillus cereus AH820                | 35.4 | 5302683 | Bacillus cereus AH820<br>plasmid pAH820 10      | 33.6 | 10915  |
| Bacillus cereus AH820                | 35.4 | 5302683 | Bacillus cereus AH820<br>plasmid pAH820 3       | 34.9 | 3091   |

|                                                |      |         |                                                                   |     |      |        |
|------------------------------------------------|------|---------|-------------------------------------------------------------------|-----|------|--------|
| Bacillus cereus AH820                          | 35.4 | 5302683 | Bacillus cereus AH820<br>plasmid pAH820                           | 272 | 33.6 | 272145 |
| Bacillus cereus ATCC<br>14579                  | 35.3 | 5411809 | Bacillus cereus<br>ATCC14579 plasmid<br>pBClin15                  |     | 38   | 15274  |
| Bacillus cereus G9842                          | 35.3 | 5387334 | Bacillus cereus G9842<br>plasmid pG9842                           | 140 | 32.9 | 140001 |
| Bacillus cereus G9842                          | 35.3 | 5387334 | Bacillus cereus G9842<br>plasmid pG9842                           | 209 | 33.5 | 209488 |
| Bacillus cereus Q1                             | 35.6 | 5214195 | Bacillus cereus Q1<br>plasmid pBc53                               |     | 35.1 | 52766  |
| Bacillus cereus subsp.<br>cytotoxis NVH 391-98 | 35.9 | 4087024 | Bacillus cereus subsp.<br>cytotoxis NVH 391-98<br>plasmid pBC9801 |     | 30.3 | 7135   |
| Bacillus megaterium<br>QM B1551                | 38.3 | 5097129 | Bacillus megaterium<br>QM B1551 plasmid                           |     | 34.8 | 5428   |
| Bacillus megaterium<br>QM B1551                | 38.3 | 5097129 | Bacillus megaterium<br>QM B1551 plasmid                           |     | 34.5 | 9098   |
| Bacillus megaterium<br>QM B1551                | 38.3 | 5097129 | Bacillus megaterium<br>QM B1551 plasmid                           |     | 35.5 | 26587  |
| Bacillus megaterium<br>QM B1551                | 38.3 | 5097129 | Bacillus megaterium<br>QM B1551 plasmid                           |     | 36.5 | 53865  |
| Bacillus megaterium<br>QM B1551                | 38.3 | 5097129 | Bacillus megaterium<br>QM B1551 plasmid                           |     | 33.9 | 66985  |
| Bacillus megaterium<br>QM B1551                | 38.3 | 5097129 | Bacillus megaterium<br>QM B1551 plasmid                           |     | 33   | 99694  |
| Bacillus megaterium<br>QM B1551                | 38.3 | 5097129 | Bacillus megaterium<br>QM B1551 plasmid                           |     | 33.5 | 164406 |
| Bacillus pseudofirmus<br>OF4                   | 40.3 | 3858997 | Bacillus pseudofirmus<br>OF4 plasmid pBpOF4-                      |     | 36   | 285222 |
| Bacillus pseudofirmus<br>OF4                   | 40.3 | 3858997 | Bacillus pseudofirmus<br>OF4 plasmid pBpOF4-                      |     | 35.5 | 105029 |
| Bacillus thuringiensis<br>BMB171               | 35.3 | 5330088 | Bacillus thuringiensis<br>BMB171 plasmid<br>pBMB171               |     | 33.3 | 312963 |

|                                         |      |         |                                                            |      |        |
|-----------------------------------------|------|---------|------------------------------------------------------------|------|--------|
| Bacillus thuringiensis<br>str. Al Hakam | 35.4 | 5257091 | Bacillus thuringiensis<br>str. Al Hakam plasmid            | 36.2 | 55939  |
| Bacillus<br>weihenstephanensis<br>KBAB4 | 35.6 | 5262775 | Bacillus<br>weihenstephanensis<br>KBAB4 plasmid<br>pBWB401 | 33.7 | 417054 |
| Bacillus<br>weihenstephanensis<br>KBAB4 | 35.6 | 5262775 | Bacillus<br>weihenstephanensis<br>KBAB4 plasmid<br>pBWB402 | 33.3 | 75107  |
| Bacillus<br>weihenstephanensis<br>KBAB4 | 35.6 | 5262775 | Bacillus<br>weihenstephanensis<br>KBAB4 plasmid<br>pBWB403 | 43.4 | 64977  |
| Bacillus<br>weihenstephanensis<br>KBAB4 | 35.6 | 5262775 | Bacillus<br>weihenstephanensis<br>KBAB4 plasmid<br>pBWB404 | 35.4 | 52830  |
| Bacteroides fragilis<br>NCTC 9343       | 43.2 | 5205140 | Bacteroides fragilis<br>NCTC 9343 plasmid                  | 32.2 | 36560  |
| Bacteroides fragilis<br>YCH46           | 43.3 | 5277274 | Bacteroides fragilis<br>YCH46 plasmid                      | 33.5 | 33716  |
| Bacteroides salanitronis<br>DSM 18170   | 46.6 | 4242803 | Bacteroides salanitronis<br>DSM 18170 plasmid<br>pBACSA01  | 32.4 | 40303  |
| Bacteroides salanitronis<br>DSM 18170   | 46.6 | 4242803 | Bacteroides salanitronis<br>DSM 18170 plasmid<br>pBACSA02  | 43.2 | 19280  |
| Bacteroides salanitronis<br>DSM 18170   | 46.6 | 4242803 | Bacteroides salanitronis<br>DSM 18170 plasmid<br>pBACSA03  | 40.3 | 6277   |
| Bartonella grahamii<br>as4aup           | 38.1 | 2341328 | Bartonella grahamii<br>as4aup plasmid pBGR3                | 36.4 | 28192  |
| Bartonella tribocorum<br>CIP 105476     | 38.9 | 2619061 | Bartonella tribocorum<br>CIP 105476 plasmidBtr             | 35   | 23343  |

|                                                              |      |         |                                                                                |      |        |
|--------------------------------------------------------------|------|---------|--------------------------------------------------------------------------------|------|--------|
| Beijerinckia indica<br>subsp. indica ATCC<br>9039            | 57.1 | 4170153 | Beijerinckia indica<br>subsp. indica ATCC<br>9039 plasmid pBIND01              | 56.2 | 181736 |
| Beijerinckia indica<br>subsp. indica ATCC<br>9039            | 57.1 | 4170153 | Beijerinckia indica<br>subsp. indica ATCC<br>9039 plasmid pBIND02              | 54.3 | 66727  |
| Bifidobacterium longum<br>DJO10A                             | 60.1 | 2375792 | Bifidobacterium longum<br>DJO10A plasmid<br>pDOJH10L                           | 62.2 | 10073  |
| Bifidobacterium longum<br>DJO10A                             | 60.1 | 2375792 | Bifidobacterium longum<br>DJO10A plasmid<br>pDOJH10S                           | 66.2 | 3661   |
| Bifidobacterium longum<br>subsp. infantis 157F               | 60.1 | 2400312 | Bifidobacterium longum<br>subsp. infantis 157F<br>plasmid p157F-NC1            | 61.9 | 4895   |
| Bifidobacterium longum<br>subsp. infantis 157F               | 60.1 | 2400312 | Bifidobacterium longum<br>subsp. infantis 157F<br>plasmid p157F-NC2            | 65   | 3624   |
| Blattabacterium sp.<br>(Periplaneta americana)<br>str. BPLAN | 28.2 | 636994  | Blattabacterium sp.<br>(Periplaneta americana)<br>str. BPLAN plasmid<br>pBPLAN | 28.5 | 3448   |
| Borrelia afzelii PKo                                         | 28.3 | 905394  | Borrelia afzelii PKo<br>plasmid cp30                                           | 29.2 | 30017  |
| Borrelia afzelii PKo                                         | 28.3 | 905394  | Borrelia afzelii PKo<br>plasmid cp27                                           | 25.9 | 26533  |
| Borrelia burgdorferi                                         | 28.6 | 910724  | Borrelia burgdorferi<br>plasmid cp32-1                                         | 29.4 | 30750  |
| Borrelia burgdorferi                                         | 28.6 | 910724  | Borrelia burgdorferi<br>plasmid cp32-3                                         | 28.9 | 30223  |
| Borrelia burgdorferi                                         | 28.6 | 910724  | Borrelia burgdorferi<br>plasmid cp32-4                                         | 29.3 | 30299  |
| Borrelia burgdorferi                                         | 28.6 | 910724  | Borrelia burgdorferi<br>plasmid cp32-6                                         | 29.3 | 29838  |

|                      |      |        |                                        |      |       |
|----------------------|------|--------|----------------------------------------|------|-------|
| Borrelia burgdorferi | 28.6 | 910724 | Borrelia burgdorferi<br>plasmid cp32-7 | 29.1 | 30800 |
| Borrelia burgdorferi | 28.6 | 910724 | Borrelia burgdorferi<br>plasmid cp32-8 | 29.1 | 30885 |
| Borrelia burgdorferi | 28.6 | 910724 | Borrelia burgdorferi<br>plasmid cp32-9 | 29.3 | 30651 |
| Borrelia burgdorferi | 28.6 | 910724 | Borrelia burgdorferi<br>plasmid lp21   | 20.7 | 18753 |
| Borrelia burgdorferi | 28.6 | 910724 | Borrelia burgdorferi<br>plasmid lp56   | 27.3 | 52971 |
| Borrelia burgdorferi | 28.6 | 910724 | Borrelia burgdorferi<br>plasmid lp5    | 23.8 | 5228  |
| Borrelia burgdorferi | 28.6 | 910724 | Borrelia burgdorferi<br>plasmid lp17   | 23.1 | 16823 |
| Borrelia burgdorferi | 28.6 | 910724 | Borrelia burgdorferi<br>plasmid lp25   | 23.4 | 24177 |
| Borrelia burgdorferi | 28.6 | 910724 | Borrelia burgdorferi<br>plasmid lp28-1 | 32.3 | 26921 |
| Borrelia burgdorferi | 28.6 | 910724 | Borrelia burgdorferi<br>plasmid lp28-2 | 31.6 | 29766 |
| Borrelia burgdorferi | 28.6 | 910724 | Borrelia burgdorferi<br>plasmid lp28-3 | 25   | 28601 |
| Borrelia burgdorferi | 28.6 | 910724 | Borrelia burgdorferi<br>plasmid lp28-4 | 24.5 | 27323 |
| Borrelia burgdorferi | 28.6 | 910724 | Borrelia burgdorferi<br>plasmid lp36   | 26.9 | 36849 |
| Borrelia burgdorferi | 28.6 | 910724 | Borrelia burgdorferi<br>plasmid lp38   | 26.1 | 38829 |
| Borrelia burgdorferi | 28.6 | 910724 | Borrelia burgdorferi<br>plasmid lp54   | 28.2 | 53561 |
| Borrelia burgdorferi | 28.6 | 910724 | Borrelia burgdorferi<br>plasmid cp26   | 26.3 | 26498 |
| Borrelia burgdorferi | 28.6 | 910724 | Borrelia burgdorferi<br>plasmid cp9    | 23.7 | 9386  |

|                             |      |        |                                               |      |        |
|-----------------------------|------|--------|-----------------------------------------------|------|--------|
| Borrelia burgdorferi<br>ZS7 | 28.5 | 906707 | Borrelia burgdorferi<br>ZS7 plasmid ZS7_cp32- | 28   | 48168  |
| Borrelia burgdorferi<br>ZS7 | 28.5 | 906707 | Borrelia burgdorferi<br>ZS7 plasmid ZS7_cp32- | 29.3 | 30467  |
| Borrelia burgdorferi<br>ZS7 | 28.5 | 906707 | Borrelia burgdorferi<br>ZS7 plasmid ZS7_cp26  | 26.3 | 26514  |
| Borrelia burgdorferi<br>ZS7 | 28.5 | 906707 | Borrelia burgdorferi<br>ZS7 plasmid ZS7_cp32- | 29.1 | 30330  |
| Borrelia burgdorferi<br>ZS7 | 28.5 | 906707 | Borrelia burgdorferi<br>ZS7 plasmid ZS7_cp32- | 29.3 | 29806  |
| Borrelia burgdorferi<br>ZS7 | 28.5 | 906707 | Borrelia burgdorferi<br>ZS7 plasmid ZS7_cp32- | 29   | 30964  |
| Borrelia duttonii Ly        | 27.6 | 931674 | Borrelia duttonii Ly<br>plasmid p111          | 25.3 | 11226  |
| Borrelia duttonii Ly        | 27.6 | 931674 | Borrelia duttonii Ly<br>plasmid p115          | 28.1 | 15049  |
| Borrelia duttonii Ly        | 27.6 | 931674 | Borrelia duttonii Ly<br>plasmid p128          | 28.9 | 28343  |
| Borrelia duttonii Ly        | 27.6 | 931674 | Borrelia duttonii Ly<br>plasmid p1165         | 26.6 | 163884 |
| Borrelia duttonii Ly        | 27.6 | 931674 | Borrelia duttonii Ly<br>plasmid p135          | 31.6 | 35286  |
| Borrelia duttonii Ly        | 27.6 | 931674 | Borrelia duttonii Ly<br>plasmid p136          | 29.5 | 35831  |
| Borrelia duttonii Ly        | 27.6 | 931674 | Borrelia duttonii Ly<br>plasmid p140          | 29.9 | 40353  |
| Borrelia duttonii Ly        | 27.6 | 931674 | Borrelia duttonii Ly<br>plasmid p141          | 29.4 | 41259  |
| Borrelia duttonii Ly        | 27.6 | 931674 | Borrelia duttonii Ly<br>plasmid p142          | 30.2 | 42153  |
| Borrelia duttonii Ly        | 27.6 | 931674 | Borrelia duttonii Ly<br>plasmid p170          | 30.2 | 66407  |
| Borrelia duttonii Ly        | 27.6 | 931674 | Borrelia duttonii Ly<br>plasmid p123          | 26.4 | 23303  |

|                                                              |      |         |                                                                                       |      |        |
|--------------------------------------------------------------|------|---------|---------------------------------------------------------------------------------------|------|--------|
| <i>Borrelia duttonii</i> Ly                                  | 27.6 | 931674  | <i>Borrelia duttonii</i> Ly<br>plasmid pI23b                                          | 29   | 23036  |
| <i>Borrelia duttonii</i> Ly                                  | 27.6 | 931674  | <i>Borrelia duttonii</i> Ly<br>plasmid pI26                                           | 28.9 | 26917  |
| <i>Borrelia duttonii</i> Ly                                  | 27.6 | 931674  | <i>Borrelia duttonii</i> Ly<br>plasmid pI31                                           | 27.8 | 31021  |
| <i>Borrelia duttonii</i> Ly                                  | 27.6 | 931674  | <i>Borrelia duttonii</i> Ly<br>plasmid pI32                                           | 30.2 | 31663  |
| <i>Borrelia duttonii</i> Ly                                  | 27.6 | 931674  | <i>Borrelia duttonii</i> Ly<br>plasmid pI27                                           | 28.5 | 27476  |
| <i>Borrelia recurrentis</i> A1                               | 27.5 | 930981  | <i>Borrelia recurrentis</i> A1<br>plasmid pI124                                       | 26.1 | 123937 |
| <i>Borrelia recurrentis</i> A1                               | 27.5 | 930981  | <i>Borrelia recurrentis</i> A1<br>plasmid pI23                                        | 25.7 | 22945  |
| <i>Borrelia recurrentis</i> A1                               | 27.5 | 930981  | <i>Borrelia recurrentis</i> A1<br>plasmid pI33                                        | 29.5 | 33213  |
| <i>Borrelia recurrentis</i> A1                               | 27.5 | 930981  | <i>Borrelia recurrentis</i> A1<br>plasmid pI35                                        | 27.3 | 35315  |
| <i>Borrelia recurrentis</i> A1                               | 27.5 | 930981  | <i>Borrelia recurrentis</i> A1<br>plasmid pI37                                        | 29.4 | 36869  |
| <i>Borrelia recurrentis</i> A1                               | 27.5 | 930981  | <i>Borrelia recurrentis</i> A1<br>plasmid pI53                                        | 29   | 52772  |
| <i>Borrelia recurrentis</i> A1                               | 27.5 | 930981  | <i>Borrelia recurrentis</i> A1<br>plasmid pI6                                         | 30.9 | 6131   |
| <i>Brachyspira</i><br><i>hyodysenteriae</i> WA1              | 27.1 | 3000694 | <i>Brachyspira</i><br><i>hyodysenteriae</i> WA1<br>plasmid pBHWA1                     | 21.8 | 35940  |
| <i>Bradyrhizobium</i> sp.<br>BTai1                           | 64.9 | 8264687 | <i>Bradyrhizobium</i> sp.<br>BTai1 plasmid                                            | 60.7 | 228826 |
| <i>Buchnera aphidicola</i><br>( <i>Baizongia pistaciae</i> ) | 25.3 | 615980  | <i>Buchnera aphidicola</i> str.<br>Bp ( <i>Baizongia pistaciae</i> )<br>plasmid pBBp1 | 25.4 | 2399   |
| <i>Buchnera</i> sp. APS                                      | 26.3 | 640681  | <i>Buchnera</i> sp. APS<br>plasmid pTrp                                               | 30.6 | 7258   |



|                                               |      |         |                                                          |      |        |
|-----------------------------------------------|------|---------|----------------------------------------------------------|------|--------|
| Buchnera sp. APS                              | 26.3 | 640681  | Buchnera sp. APS                                         | 26.7 | 7786   |
| Burkholderia ambifaria<br>MC40-6 chromosome 1 | 66.9 | 3443583 | plasmid pLeu<br>Burkholderia ambifaria<br>MC40-6 plasmid | 61.2 | 301592 |
| Burkholderia ambifaria<br>MC40-6 chromosome 2 | 66.5 | 2769414 | pBMC401<br>Burkholderia ambifaria<br>MC40-6 plasmid      | 61.2 | 301592 |
| Burkholderia ambifaria<br>MC40-6 chromosome 3 | 65.9 | 1127947 | pBMC401<br>Burkholderia ambifaria<br>MC40-6 plasmid      | 61.2 | 301592 |
| Burkholderia<br>cenocepacia HI2424            | 66.8 | 3483902 | pBMC401<br>Burkholderia<br>cenocepacia HI2424            | 61.8 | 164857 |
| Burkholderia<br>cenocepacia HI2424            | 66.9 | 2998664 | Burkholderia<br>cenocepacia HI2424                       | 61.8 | 164857 |
| Burkholderia<br>cenocepacia HI2424            | 67.3 | 1055417 | Burkholderia<br>cenocepacia HI2424                       | 61.8 | 164857 |
| Burkholderia<br>cenocepacia J2315             | 66.7 | 3870082 | Burkholderia<br>cenocepacia J2315                        | 62.8 | 92661  |
| Burkholderia<br>cenocepacia J2315             | 67.3 | 3217062 | Burkholderia<br>cenocepacia J2315                        | 62.8 | 92661  |
| Burkholderia<br>cenocepacia J2315             | 66.9 | 875977  | Burkholderia<br>cenocepacia J2315                        | 62.8 | 92661  |
| Burkholderia<br>cenocepacia MC0-3             | 66.7 | 3532883 | Burkholderia cepacia<br>AMMD plasmid 1                   | 65.8 | 43581  |
| Burkholderia<br>cenocepacia MC0-3             | 66.6 | 3213911 | Burkholderia cepacia<br>AMMD plasmid 1                   | 65.8 | 43581  |
| Burkholderia<br>cenocepacia MC0-3             | 66.2 | 1224595 | Burkholderia cepacia<br>AMMD plasmid 1                   | 65.8 | 43581  |
| Burkholderia cepacia<br>AMMD chromosome 1     | 66.9 | 3556545 | Burkholderia cepacia<br>AMMD plasmid 1                   | 65.8 | 43581  |
| Burkholderia cepacia<br>AMMD chromosome 2     | 66.8 | 2646969 | Burkholderia cepacia<br>AMMD plasmid 1                   | 65.8 | 43581  |
| Burkholderia cepacia<br>AMMD chromosome 3     | 66.5 | 1281472 | Burkholderia cepacia<br>AMMD plasmid 1                   | 65.8 | 43581  |

|                                               |      |         |                                                       |      |        |
|-----------------------------------------------|------|---------|-------------------------------------------------------|------|--------|
| Burkholderia gladioli<br>BSR3                 | 67.5 | 4413616 | Burkholderia gladioli<br>BSR3 plasmid bgla_1p         | 63.3 | 276215 |
| Burkholderia gladioli<br>BSR3                 | 67.5 | 4413616 | Burkholderia gladioli<br>BSR3 plasmid bgla_2p         | 62.8 | 129399 |
| Burkholderia gladioli<br>BSR3                 | 67.5 | 4413616 | Burkholderia gladioli<br>BSR3 plasmid bgla_3p         | 59.6 | 128650 |
| Burkholderia gladioli<br>BSR3                 | 67.5 | 4413616 | Burkholderia gladioli<br>BSR3 plasmid bgla_4p         | 62.4 | 403586 |
| Burkholderia gladioli<br>BSR3 chromosome 2    | 68.6 | 3700833 | Burkholderia gladioli<br>BSR3 plasmid bgla_1p         | 63.3 | 276215 |
| Burkholderia gladioli<br>BSR3 chromosome 2    | 68.6 | 3700833 | Burkholderia gladioli<br>BSR3 plasmid bgla_2p         | 62.8 | 129399 |
| Burkholderia gladioli<br>BSR3 chromosome 2    | 68.6 | 3700833 | Burkholderia gladioli<br>BSR3 plasmid bgla_3p         | 59.6 | 128650 |
| Burkholderia gladioli<br>BSR3 chromosome 2    | 68.6 | 3700833 | Burkholderia gladioli<br>BSR3 plasmid bgla_4p         | 62.4 | 403586 |
| Burkholderia glumae<br>BGR1                   | 68.1 | 3906529 | Burkholderia glumae<br>BGR1 plasmid bglu_1p           | 60.6 | 133591 |
| Burkholderia glumae<br>BGR1                   | 68.1 | 3906529 | Burkholderia glumae<br>BGR1 plasmid bglu_2p           | 63.2 | 141792 |
| Burkholderia glumae<br>BGR1                   | 68.1 | 3906529 | Burkholderia glumae<br>BGR1 plasmid bglu_3p           | 62.7 | 141067 |
| Burkholderia glumae<br>BGR1                   | 68.1 | 3906529 | Burkholderia glumae<br>BGR1 plasmid bglu_4p           | 62.7 | 134349 |
| Burkholderia glumae<br>BGR1 chromosome 2      | 68.8 | 2827355 | Burkholderia glumae<br>BGR1 plasmid bglu_1p           | 60.6 | 133591 |
| Burkholderia glumae<br>BGR1 chromosome 2      | 68.8 | 2827355 | Burkholderia glumae<br>BGR1 plasmid bglu_2p           | 63.2 | 141792 |
| Burkholderia glumae<br>BGR1 chromosome 2      | 68.8 | 2827355 | Burkholderia glumae<br>BGR1 plasmid bglu_3p           | 62.7 | 141067 |
| Burkholderia glumae<br>BGR1 chromosome 2      | 68.8 | 2827355 | Burkholderia glumae<br>BGR1 plasmid bglu_4p           | 62.7 | 134349 |
| Burkholderia<br>multivorans ATCC<br>17616 JGI | 66.9 | 3448466 | Burkholderia<br>multivorans ATCC<br>17616 JGI plasmid | 61.3 | 167422 |

|                                                          |      |         |                                                          |      |         |
|----------------------------------------------------------|------|---------|----------------------------------------------------------|------|---------|
| Burkholderia<br>multivorans ATCC<br>17616 JGI chromosome | 67.1 | 2472928 | Burkholderia<br>multivorans ATCC<br>17616 JGI plasmid    | 61.3 | 167422  |
| Burkholderia<br>multivorans ATCC<br>17616 JGI chromosome | 65.8 | 919806  | Burkholderia<br>multivorans ATCC<br>17616 JGI plasmid    | 61.3 | 167422  |
| Burkholderia<br>multivorans ATCC<br>17616 Tohoku         | 66.9 | 3448421 | Burkholderia<br>multivorans ATCC<br>17616 Tohoku plasmid | 61.3 | 167422  |
| Burkholderia<br>multivorans ATCC<br>17616 Tohoku         | 67.1 | 2473162 | Burkholderia<br>multivorans ATCC<br>17616 Tohoku plasmid | 61.3 | 167422  |
| Burkholderia<br>multivorans ATCC<br>17616 Tohoku         | 65.8 | 919805  | Burkholderia<br>multivorans ATCC<br>17616 Tohoku plasmid | 61.3 | 167422  |
| Burkholderia phymatum<br>STM815                          | 63   | 3479187 | Burkholderia phymatum<br>STM815 plasmid<br>pBPHY01       | 61.9 | 1904893 |
| Burkholderia phymatum<br>STM815                          | 63   | 3479187 | Burkholderia phymatum<br>STM815 plasmid<br>pBPHY02       | 59.2 | 595108  |
| Burkholderia phymatum<br>STM815 chromosome 2             | 62.3 | 2697374 | Burkholderia phymatum<br>STM815 plasmid<br>pBPHY01       | 61.9 | 1904893 |
| Burkholderia phymatum<br>STM815 chromosome 2             | 62.3 | 2697374 | Burkholderia phymatum<br>STM815 plasmid<br>pBPHY02       | 59.2 | 595108  |
| Burkholderia<br>phytofirmans PsJN                        | 62.6 | 4467537 | Burkholderia<br>phytofirmans PsJN                        | 58.3 | 121122  |
| Burkholderia<br>phytofirmans PsJN                        | 62.1 | 3625999 | Burkholderia<br>phytofirmans PsJN                        | 58.3 | 121122  |
| Burkholderia sp.<br>CCGE1002                             | 64.1 | 3518940 | Burkholderia sp.<br>CCGE1002 plasmid<br>pBC201           | 59.2 | 489136  |

|                                              |      |         |                                                |      |        |
|----------------------------------------------|------|---------|------------------------------------------------|------|--------|
| Burkholderia sp.<br>CCGE1002<br>chromosome 2 | 63.2 | 2593966 | Burkholderia sp.<br>CCGE1002 plasmid<br>pBC201 | 59.2 | 489136 |
| Burkholderia sp.<br>CCGE1002<br>chromosome 3 | 62.6 | 1282816 | Burkholderia sp.<br>CCGE1002 plasmid<br>pBC201 | 59.2 | 489136 |
| Burkholderia<br>vietnamiensis G4             | 66.5 | 3652814 | Burkholderia<br>vietnamiensis G4               | 61.7 | 88096  |
| Burkholderia<br>vietnamiensis G4             | 66.5 | 3652814 | Burkholderia<br>vietnamiensis G4               | 61.8 | 265616 |
| Burkholderia<br>vietnamiensis G4             | 66.5 | 3652814 | Burkholderia<br>vietnamiensis G4               | 61   | 107231 |
| Burkholderia<br>vietnamiensis G4             | 66.5 | 3652814 | Burkholderia<br>vietnamiensis G4               | 59.8 | 226679 |
| Burkholderia<br>vietnamiensis G4             | 66.5 | 3652814 | Burkholderia<br>vietnamiensis G4               | 58.2 | 397868 |
| Burkholderia<br>vietnamiensis G4             | 66.8 | 2411759 | Burkholderia<br>vietnamiensis G4               | 61.7 | 88096  |
| Burkholderia<br>vietnamiensis G4             | 66.8 | 2411759 | Burkholderia<br>vietnamiensis G4               | 61.8 | 265616 |
| Burkholderia<br>vietnamiensis G4             | 66.8 | 2411759 | Burkholderia<br>vietnamiensis G4               | 61   | 107231 |
| Burkholderia<br>vietnamiensis G4             | 66.8 | 2411759 | Burkholderia<br>vietnamiensis G4               | 59.8 | 226679 |
| Burkholderia<br>vietnamiensis G4             | 66.8 | 2411759 | Burkholderia<br>vietnamiensis G4               | 58.2 | 397868 |
| Burkholderia<br>vietnamiensis G4             | 66.4 | 1241007 | Burkholderia<br>vietnamiensis G4               | 61.7 | 88096  |
| Burkholderia<br>vietnamiensis G4             | 66.4 | 1241007 | Burkholderia<br>vietnamiensis G4               | 61.8 | 265616 |
| Burkholderia<br>vietnamiensis G4             | 66.4 | 1241007 | Burkholderia<br>vietnamiensis G4               | 61   | 107231 |
| Burkholderia<br>vietnamiensis G4             | 66.4 | 1241007 | Burkholderia<br>vietnamiensis G4               | 59.8 | 226679 |

|                                                |      |         |                                                             |      |        |
|------------------------------------------------|------|---------|-------------------------------------------------------------|------|--------|
| Burkholderia vietnamiensis G4                  | 66.4 | 1241007 | Burkholderia vietnamiensis G4                               | 58.2 | 397868 |
| Butyrivibrio proteoclasticus B316              | 40.2 | 3554804 | Butyrivibrio proteoclasticus B316                           | 39   | 361399 |
| Butyrivibrio proteoclasticus B316              | 40.2 | 3554804 | Butyrivibrio proteoclasticus B316                           | 38.1 | 186325 |
| Butyrivibrio proteoclasticus B316              | 40   | 302358  | Butyrivibrio proteoclasticus B316                           | 39   | 361399 |
| Butyrivibrio proteoclasticus B316              | 40   | 302358  | Butyrivibrio proteoclasticus B316                           | 38.1 | 186325 |
| Caldicellulosiruptor kristjanssonii 177R1B     | 36.1 | 2786473 | Caldicellulosiruptor kristjanssonii 177R1B                  | 35.8 | 15970  |
| Calditerrivibrio nitroreducens DSM 19672       | 35.8 | 2157835 | Calditerrivibrio nitroreducens DSM 19672 plasmid            | 31.1 | 58717  |
| Campylobacter concisus 13826                   | 39.4 | 2052007 | Campylobacter concisus 13826 plasmid                        | 31.6 | 30949  |
| Campylobacter concisus 13826                   | 39.4 | 2052007 | Campylobacter concisus 13826 plasmid                        | 33.5 | 16457  |
| Campylobacter hominis ATCC BAA-381             | 31.7 | 1711273 | Campylobacter hominis ATCC BAA-381 plasmid pCH4             | 34.1 | 3678   |
| Campylobacter jejuni subsp. jejuni 81-176      | 30.6 | 1616554 | Campylobacter jejuni subsp. jejuni 81-176 plasmid pVir      | 25.9 | 37473  |
| Campylobacter jejuni subsp. jejuni 81-176      | 30.6 | 1616554 | Campylobacter jejuni subsp. jejuni 81-176 plasmid pTet      | 29.1 | 45025  |
| Campylobacter jejuni subsp. jejuni ICDCCJ07001 | 30.6 | 1664840 | Campylobacter jejuni subsp. jejuni ICDCCJ07001 plasmid pTet | 28.7 | 44084  |

|                                                                        |      |         |                                                                                          |      |        |
|------------------------------------------------------------------------|------|---------|------------------------------------------------------------------------------------------|------|--------|
| Campylobacter lari<br>RM2100                                           | 29.7 | 1525460 | Campylobacter lari<br>RM2100 megaplasmid<br>pCL2100                                      | 26.9 | 46201  |
| Candidatus<br>Accumulibacter<br>phosphatis clade IIA str.<br>UW-1      | 64.1 | 5058518 | Candidatus<br>Accumulibacter<br>phosphatis clade IIA str.<br>UW-1 plasmid pAph01         | 61.6 | 167595 |
| Candidatus<br>Accumulibacter<br>phosphatis clade IIA str.<br>UW-1      | 64.1 | 5058518 | Candidatus<br>Accumulibacter<br>phosphatis clade IIA str.<br>UW-1 plasmid pAph02         | 60.7 | 42325  |
| Candidatus<br>Accumulibacter<br>phosphatis clade IIA str.<br>UW-1      | 64.1 | 5058518 | Candidatus<br>Accumulibacter<br>phosphatis clade IIA str.<br>UW-1 plasmid pAph03         | 59.3 | 37695  |
| Candidatus<br>Azobacteroides<br>pseudotrichonymphae<br>genomovar. CFP2 | 32.7 | 1114206 | Candidatus<br>Azobacteroides<br>pseudotrichonymphae<br>genomovar. CFP2<br>plasmid pCFPG1 | 36   | 37560  |
| Candidatus<br>Azobacteroides<br>pseudotrichonymphae<br>genomovar. CFP2 | 32.7 | 1114206 | Candidatus<br>Azobacteroides<br>pseudotrichonymphae<br>genomovar. CFP2<br>plasmid pCFPG2 | 35   | 37111  |
| Candidatus<br>Azobacteroides<br>pseudotrichonymphae<br>genomovar. CFP2 | 32.7 | 1114206 | Candidatus<br>Azobacteroides<br>pseudotrichonymphae<br>genomovar. CFP2<br>plasmid pCFPG3 | 35.6 | 31893  |
| Candidatus<br>Azobacteroides<br>pseudotrichonymphae<br>genomovar. CFP2 | 32.7 | 1114206 | Candidatus<br>Azobacteroides<br>pseudotrichonymphae<br>genomovar. CFP2<br>plasmid pCFPG4 | 44.3 | 4149   |

|                                                                   |      |         |
|-------------------------------------------------------------------|------|---------|
| Candidatus<br>Hamiltonella defensa<br>5AT (Acyrtosiphon<br>pisum) | 40.3 | 2110331 |
| Candidatus Riesia<br>pediculicola USDA                            | 28.5 | 574390  |
| Carnobacterium sp. 17-4                                           | 35.3 | 2635294 |
| Caulobacter sp. K31                                               | 67.5 | 5477872 |
| Caulobacter sp. K31                                               | 67.5 | 5477872 |
| Chlamydia muridarum                                               | 40.3 | 1072950 |
| Chlamydomphila caviae<br>GPIC                                     | 39.2 | 1173390 |
| Chlamydomphila felis<br>Fe C-56                                   | 39.4 | 1166239 |
| Chlamydomphila psittaci<br>6BC                                    | 39.1 | 1171660 |
| Citrobacter koseri<br>ATCC BAA-895                                | 53.8 | 4720462 |
| Citrobacter koseri<br>ATCC BAA-895                                | 53.8 | 4720462 |
| Citrobacter rodentium<br>ICC168                                   | 54.7 | 5346659 |
| Citrobacter rodentium<br>ICC168                                   | 54.7 | 5346659 |
| Citrobacter rodentium<br>ICC168                                   | 54.7 | 5346659 |
| Clavibacter<br>michiganensis subsp.<br>michiganensis NCPPB<br>382 | 72.7 | 3297891 |

|                                                                                |      |        |
|--------------------------------------------------------------------------------|------|--------|
| Candidatus<br>Hamiltonella defensa<br>5AT (Acyrtosiphon<br>pisum) plasmid      | 45.3 | 59032  |
| Candidatus Riesia<br>pediculicola USDA<br>plasmid pPAN                         | 35.2 | 7737   |
| Carnobacterium sp. 17-4<br>plasmid pCAR50                                      | 31.5 | 50105  |
| Caulobacter sp. K31<br>plasmid pCAUL01                                         | 67   | 233649 |
| Caulobacter sp. K31<br>plasmid pCAUL02                                         | 64.3 | 177878 |
| Chlamydia muridarum<br>plasmid pMoPn                                           | 35.7 | 7501   |
| Chlamydomphila caviae<br>GPIC plasmid                                          | 33.7 | 7966   |
| Chlamydomphila felis<br>Fe C-56 plasmid pCfe1                                  | 33.9 | 7552   |
| Chlamydomphila psittaci<br>6BC plasmid p6BC                                    | 32.9 | 7553   |
| Citrobacter koseri<br>ATCC BAA-895                                             | 55.2 | 9294   |
| Citrobacter koseri<br>ATCC BAA-895                                             | 51.3 | 5601   |
| Citrobacter rodentium<br>ICC168 plasmid                                        | 47.2 | 54449  |
| Citrobacter rodentium<br>ICC168 plasmid                                        | 41.7 | 39265  |
| Citrobacter rodentium<br>ICC168 plasmid                                        | 51   | 3910   |
| Clavibacter<br>michiganensis subsp.<br>michiganensis NCPPB<br>382 plasmid pCM1 | 67.6 | 27357  |

|                                                          |      |         |                                                                       |      |        |
|----------------------------------------------------------|------|---------|-----------------------------------------------------------------------|------|--------|
| Clavibacter michiganensis subsp. michiganensis NCPPB 382 | 72.7 | 3297891 | Clavibacter michiganensis subsp. michiganensis NCPPB 382 plasmid pCM2 | 66.5 | 69989  |
| Clostridium acetobutylicum                               | 30.9 | 3940880 | Clostridium acetobutylicum plasmid                                    | 30.9 | 192000 |
| Clostridium botulinum A str. ATCC 3502                   | 28.2 | 3886916 | Clostridium botulinum A str. ATCC 3502 plasmid pBOT3502               | 26.8 | 16344  |
| Clostridium botulinum A3 str. Loch Maree                 | 28.3 | 3992906 | Clostridium botulinum A3 str. Loch Maree plasmid pCLK                 | 25.6 | 266785 |
| Clostridium botulinum B str. Eklund 17B                  | 27.5 | 3800327 | Clostridium botulinum B str. Eklund 17B plasmid pCLL                  | 25   | 47642  |
| Clostridium botulinum B1 str. Okra                       | 28.3 | 3958233 | Clostridium botulinum B1 str. Okra plasmid                            | 25.4 | 148780 |
| Clostridium botulinum BKT015925                          | 28.5 | 2773157 | Clostridium botulinum BKT015925 plasmid p1BKT015925                   | 26.5 | 203287 |
| Clostridium botulinum BKT015925                          | 28.5 | 2773157 | Clostridium botulinum BKT015925 plasmid p2BKT015925                   | 26.1 | 98732  |
| Clostridium botulinum BKT015925                          | 28.5 | 2773157 | Clostridium botulinum BKT015925 plasmid p3BKT015925                   | 26.8 | 80365  |
| Clostridium botulinum BKT015925                          | 28.5 | 2773157 | Clostridium botulinum BKT015925 plasmid p4BKT015925                   | 28.1 | 39648  |
| Clostridium botulinum BKT015925                          | 28.5 | 2773157 | Clostridium botulinum BKT015925 plasmid p5BKT015925                   | 26.3 | 12403  |
| Clostridium botulinum Ba4 str. 657                       | 28.2 | 3977794 | Clostridium botulinum Ba4 str. 657 plasmid                            | 25.6 | 270022 |



|                                               |      |         |                                                           |      |        |
|-----------------------------------------------|------|---------|-----------------------------------------------------------|------|--------|
| Clostridium botulinum<br>Ba4 str. 657         | 28.2 | 3977794 | Clostridium botulinum<br>Ba4 str. 657 plasmid             | 24.1 | 9953   |
| Clostridium botulinum<br>F str. Langeland     | 28.3 | 3995387 | Clostridium botulinum<br>F str. Langeland<br>plasmid pCLI | 26.1 | 17531  |
| Clostridium difficile<br>630                  | 29.1 | 4290252 | Clostridium difficile<br>630 plasmid pCD630               | 27.9 | 7881   |
| Clostridium kluyveri<br>DSM 555               | 32   | 3964618 | Clostridium kluyveri<br>DSM 555 plasmid                   | 33.4 | 59182  |
| Clostridium kluyveri<br>NBRC 12016            | 32   | 3896121 | Clostridium kluyveri<br>NBRC 12016 plasmid<br>pCKL1       | 33.4 | 59182  |
| Clostridium perfringens                       | 28.6 | 3031430 | Clostridium perfringens<br>plasmid pCP13                  | 25.5 | 54310  |
| Clostridium perfringens<br>SM101              | 28.2 | 2897393 | Clostridium perfringens<br>SM101 plasmid 1                | 26.7 | 12397  |
| Clostridium perfringens<br>SM101              | 28.2 | 2897393 | Clostridium perfringens<br>SM101 plasmid 2                | 25.8 | 12206  |
| Corynebacterium<br>aurimucosum ATCC<br>700975 | 60.6 | 2790189 | Corynebacterium<br>aurimucosum plasmid<br>pET44827        | 53.3 | 29037  |
| Corynebacterium<br>glutamicum R               | 54.1 | 3314179 | Corynebacterium<br>glutamicum R plasmid<br>pCGR1          | 53.9 | 49120  |
| Coxiella burnetii<br>CbuK_Q154                | 42.7 | 2063100 | Coxiella burnetii<br>CbuK_Q154 plasmid<br>pQpRS K Q154    | 39.7 | 39280  |
| Coxiella burnetii<br>Dugway 7E9-12            | 42.4 | 2158758 | Coxiella burnetii<br>Dugway 7E9-12                        | 39.8 | 54179  |
| Coxiella burnetii RSA<br>331                  | 42.8 | 2016427 | Coxiella burnetii RSA<br>331 plasmid QpH1                 | 39.3 | 37317  |
| Cronobacter turicensis                        | 57.4 | 4384526 | Cronobacter turicensis<br>plasmid pCTU1                   | 56.1 | 138339 |
| Cronobacter turicensis                        | 57.4 | 4384526 | Cronobacter turicensis<br>plasmid pCTU2                   | 49.2 | 22448  |

|                                                     |      |         |                                             |      |        |
|-----------------------------------------------------|------|---------|---------------------------------------------|------|--------|
| Cronobacter turicensis                              | 57.4 | 4384526 | Cronobacter turicensis<br>plasmid pCTU3     | 50   | 53842  |
| Cupriavidus taiwanensis                             | 67.5 | 3416911 | Cupriavidus taiwanensis<br>plasmid pRALTA   | 59.7 | 557200 |
| Cupriavidus taiwanensis<br>chromosome 2             | 67.9 | 2502411 | Cupriavidus taiwanensis<br>plasmid pRALTA   | 59.7 | 557200 |
| Cyanothece sp. ATCC<br>51142 chromosome<br>circular | 37.9 | 4934271 | Cyanothece sp. ATCC<br>51142 plasmid A      | 36.8 | 39620  |
| Cyanothece sp. ATCC<br>51142 chromosome<br>circular | 37.9 | 4934271 | Cyanothece sp. ATCC<br>51142 plasmid B      | 41.5 | 31856  |
| Cyanothece sp. ATCC<br>51142 chromosome<br>circular | 37.9 | 4934271 | Cyanothece sp. ATCC<br>51142 plasmid C      | 38.1 | 14685  |
| Cyanothece sp. ATCC<br>51142 chromosome<br>circular | 37.9 | 4934271 | Cyanothece sp. ATCC<br>51142 plasmid D      | 37   | 10244  |
| Cyanothece sp. ATCC<br>51142 chromosome             | 38.6 | 429701  | Cyanothece sp. ATCC<br>51142 plasmid A      | 36.8 | 39620  |
| Cyanothece sp. ATCC<br>51142 chromosome             | 38.6 | 429701  | Cyanothece sp. ATCC<br>51142 plasmid B      | 41.5 | 31856  |
| Cyanothece sp. ATCC<br>51142 chromosome             | 38.6 | 429701  | Cyanothece sp. ATCC<br>51142 plasmid C      | 38.1 | 14685  |
| Cyanothece sp. ATCC<br>51142 chromosome             | 38.6 | 429701  | Cyanothece sp. ATCC<br>51142 plasmid D      | 37   | 10244  |
| Cyanothece sp. PCC<br>7424                          | 38.6 | 5942652 | Cyanothece sp. PCC<br>7424 plasmid pP742401 | 37.1 | 328635 |
| Cyanothece sp. PCC<br>7424                          | 38.6 | 5942652 | Cyanothece sp. PCC<br>7424 plasmid pP742402 | 37.4 | 197705 |
| Cyanothece sp. PCC<br>7424                          | 38.6 | 5942652 | Cyanothece sp. PCC<br>7424 plasmid pP742403 | 40.7 | 29239  |
| Cyanothece sp. PCC<br>7424                          | 38.6 | 5942652 | Cyanothece sp. PCC<br>7424 plasmid pP742404 | 39.4 | 22636  |

|                                     |      |         |                                                           |      |        |
|-------------------------------------|------|---------|-----------------------------------------------------------|------|--------|
| Cyanothece sp. PCC<br>7424          | 38.6 | 5942652 | Cyanothece sp. PCC<br>7424 plasmid pP742405               | 38.2 | 18083  |
| Cyanothece sp. PCC<br>7424          | 38.6 | 5942652 | Cyanothece sp. PCC<br>7424 plasmid pP742406               | 40.2 | 15219  |
| Cyanothece sp. PCC<br>7425          | 50.8 | 5374574 | Cyanothece sp. PCC<br>7425 plasmid pP742501               | 48.9 | 196837 |
| Cyanothece sp. PCC<br>7425          | 50.8 | 5374574 | Cyanothece sp. PCC<br>7425 plasmid pP742502               | 49.1 | 179973 |
| Cyanothece sp. PCC<br>7425          | 50.8 | 5374574 | Cyanothece sp. PCC<br>7425 plasmid pP742503               | 47.1 | 34726  |
| Cyanothece sp. PCC<br>7822          | 40.2 | 6091620 | Cyanothece sp. PCC<br>7822 plasmid Cy782203               | 39   | 291993 |
| Cyanothece sp. PCC<br>7822          | 40.2 | 6091620 | Cyanothece sp. PCC<br>7822 plasmid Cy782204               | 39   | 47550  |
| Cyanothece sp. PCC<br>7822          | 40.2 | 6091620 | Cyanothece sp. PCC<br>7822 plasmid Cy782205               | 41.8 | 43617  |
| Cyanothece sp. PCC<br>8801          | 39.8 | 4679413 | Cyanothece sp. PCC<br>8801 plasmid pP880101               | 38.9 | 50894  |
| Cyanothece sp. PCC<br>8801          | 39.8 | 4679413 | Cyanothece sp. PCC<br>8801 plasmid pP880102               | 40.2 | 40786  |
| Cyanothece sp. PCC<br>8801          | 39.8 | 4679413 | Cyanothece sp. PCC<br>8801 plasmid pP880103               | 40.4 | 16601  |
| Cyanothece sp. PCC<br>8802          | 39.8 | 4669813 | Cyanothece sp. PCC<br>8802 plasmid pP880201               | 39.5 | 75678  |
| Cyanothece sp. PCC<br>8802          | 39.8 | 4669813 | Cyanothece sp. PCC<br>8802 plasmid pP880202               | 41.5 | 23870  |
| Cyanothece sp. PCC<br>8802          | 39.8 | 4669813 | Cyanothece sp. PCC<br>8802 plasmid pP880203               | 39.3 | 22723  |
| Cyanothece sp. PCC<br>8802          | 39.8 | 4669813 | Cyanothece sp. PCC<br>8802 plasmid pP880204               | 38.3 | 11263  |
| Deferribacter<br>desulfuricans SSM1 | 31.1 | 2234389 | Deferribacter<br>desulfuricans SSM1<br>megaplasmid pDF308 | 24.5 | 308544 |
| Deinococcus deserti<br>VCD115       | 63.4 | 2819842 | Deinococcus deserti<br>VCD115 plasmid 1                   | 60.7 | 324711 |

|                                                        |      |         |                                                          |      |        |
|--------------------------------------------------------|------|---------|----------------------------------------------------------|------|--------|
| Deinococcus deserti<br>VCD115                          | 63.4 | 2819842 | Deinococcus deserti<br>VCD115 plasmid 2                  | 63.5 | 314317 |
| Deinococcus deserti<br>VCD115                          | 63.4 | 2819842 | Deinococcus deserti<br>VCD115 plasmid 3                  | 61.4 | 396459 |
| Deinococcus<br>proteolyticus MRP                       | 66.2 | 2147060 | Deinococcus<br>proteolyticus MRP                         | 66.5 | 314518 |
| Deinococcus<br>proteolyticus MRP                       | 66.2 | 2147060 | Deinococcus<br>proteolyticus MRP                         | 61.4 | 195800 |
| Deinococcus<br>proteolyticus MRP                       | 66.2 | 2147060 | Deinococcus<br>proteolyticus MRP                         | 66.1 | 132270 |
| Deinococcus<br>proteolyticus MRP                       | 66.2 | 2147060 | Deinococcus<br>proteolyticus MRP                         | 59.2 | 97188  |
| Deinococcus<br>radiodurans R1                          | 67   | 2648638 | Deinococcus<br>radiodurans plasmid                       | 63.2 | 177466 |
| Deinococcus<br>radiodurans R1                          | 67   | 2648638 | Deinococcus<br>radiodurans plasmid                       | 56.2 | 45704  |
| Deinococcus<br>radiodurans R1<br>complete chromosome 2 | 66.7 | 412348  | Deinococcus<br>radiodurans plasmid<br>MP1                | 63.2 | 177466 |
| Deinococcus<br>radiodurans R1<br>complete chromosome 2 | 66.7 | 412348  | Deinococcus<br>radiodurans plasmid<br>CP1                | 56.2 | 45704  |
| Desulfobacterium<br>autotrophicum HRM2                 | 48.8 | 5589073 | Desulfobacterium<br>autotrophicum HRM2<br>plasmid pHRM2a | 42   | 68709  |
| Desulfohalobium<br>retbaense DSM 5692                  | 57.5 | 2864304 | Desulfohalobium<br>retbaense DSM 5692<br>plasmid pDRET01 | 44.1 | 45263  |
| Desulfotalea<br>psychrophila LSv54                     | 46.8 | 3523383 | Desulfotalea<br>psychrophila LSv54                       | 43.6 | 121587 |
| Desulfotalea<br>psychrophila LSv54                     | 46.8 | 3523383 | Desulfotalea<br>psychrophila LSv54                       | 28.6 | 14664  |
| Desulfovibrio<br>magneticus RS-1                       | 62.8 | 5248049 | Desulfovibrio<br>magneticus RS-1                         | 58   | 58704  |

|                                                                 |      |         |                                                                                |      |        |
|-----------------------------------------------------------------|------|---------|--------------------------------------------------------------------------------|------|--------|
| Desulfovibrio<br>magneticus RS-1                                | 62.8 | 5248049 | Desulfovibrio<br>magneticus RS-1                                               | 37.2 | 8867   |
| Desulfovibrio vulgaris<br>subsp. vulgaris DP4                   | 63   | 3462887 | Desulfovibrio vulgaris<br>subsp. vulgaris DP4<br>plasmid pDVUL01               | 65.7 | 198504 |
| Desulfovibrio vulgaris<br>subsp. vulgaris str.<br>Hildenborough | 63.1 | 3570858 | Desulfovibrio vulgaris<br>subsp. vulgaris str.<br>Hildenborough<br>megaplasmid | 65.7 | 202301 |
| Dinoroseobacter shibae<br>DFL 12                                | 66   | 3789584 | Dinoroseobacter shibae<br>DFL 12 plasmid                                       | 60.1 | 190506 |
| Dinoroseobacter shibae<br>DFL 12                                | 66   | 3789584 | Dinoroseobacter shibae<br>DFL 12 plasmid                                       | 65.2 | 152970 |
| Dinoroseobacter shibae<br>DFL 12                                | 66   | 3789584 | Dinoroseobacter shibae<br>DFL 12 plasmid                                       | 60.5 | 126304 |
| Dinoroseobacter shibae<br>DFL 12                                | 66   | 3789584 | Dinoroseobacter shibae<br>DFL 12 plasmid                                       | 61   | 86208  |
| Dinoroseobacter shibae<br>DFL 12                                | 66   | 3789584 | Dinoroseobacter shibae<br>DFL 12 plasmid                                       | 68.9 | 72296  |
| Edwardsiella tarda<br>EIB202                                    | 59.7 | 3760463 | Edwardsiella tarda<br>EIB202 plasmid                                           | 57.3 | 43703  |
| Enterobacter cloacae<br>subsp. cloacae ATCC<br>13047            | 54.8 | 5314581 | Enterobacter cloacae<br>subsp. cloacae ATCC<br>13047 plasmid pECL A            | 52.5 | 199562 |
| Enterobacter cloacae<br>subsp. cloacae ATCC<br>13047            | 54.8 | 5314581 | Enterobacter cloacae<br>subsp. cloacae ATCC<br>13047 plasmid pECL B            | 46.8 | 84653  |
| Enterobacter sakazakii<br>ATCC BAA-894                          | 56.8 | 4368373 | Enterobacter sakazakii<br>ATCC BAA-894<br>plasmid pESA2                        | 51.6 | 31208  |
| Enterobacter sakazakii<br>ATCC BAA-894                          | 56.8 | 4368373 | Enterobacter sakazakii<br>ATCC BAA-894<br>plasmid pESA3                        | 56.8 | 131196 |
| Enterobacter sp. 638                                            | 53   | 4518712 | Enterobacter sp. 638<br>plasmid pENTE01                                        | 50.6 | 157749 |

|                                      |      |         |                                                          |      |        |
|--------------------------------------|------|---------|----------------------------------------------------------|------|--------|
| Erwinia amylovora<br>ATCC 49946      | 53.6 | 3805874 | Erwinia amylovora<br>ATCC 49946 plasmid 1                | 50.2 | 28243  |
| Erwinia amylovora<br>ATCC 49946      | 53.6 | 3805874 | Erwinia amylovora<br>ATCC 49946 plasmid 2                | 55.7 | 71487  |
| Erwinia billingiae<br>Eb661          | 55.2 | 5100167 | Erwinia billingiae<br>Eb661 plasmid pEB102               | 51.7 | 102323 |
| Erwinia billingiae<br>Eb661          | 55.2 | 5100167 | Erwinia billingiae<br>Eb661 plasmid pEB170               | 52.3 | 169778 |
| Erwinia pyrifoliae<br>Ep1/96         | 53.4 | 4026322 | Erwinia pyrifoliae<br>Ep1/96 plasmid pEP36               | 49.9 | 35909  |
| Erwinia pyrifoliae<br>Ep1/96         | 53.4 | 4026322 | Erwinia pyrifoliae<br>Ep1/96 plasmid pEP03               | 49   | 3070   |
| Erwinia pyrifoliae<br>Ep1/96         | 53.4 | 4026322 | Erwinia pyrifoliae<br>Ep1/96 plasmid pEP05               | 53.2 | 4955   |
| Erwinia tasmaniensis                 | 53.7 | 3883467 | Erwinia tasmaniensis<br>plasmid pET46                    | 49   | 46159  |
| Erwinia tasmaniensis                 | 53.7 | 3883467 | Erwinia tasmaniensis<br>plasmid pET09                    | 47   | 9299   |
| Erwinia tasmaniensis                 | 53.7 | 3883467 | Erwinia tasmaniensis<br>plasmid pET35                    | 40   | 35494  |
| Erwinia tasmaniensis                 | 53.7 | 3883467 | Erwinia tasmaniensis<br>plasmid pET49                    | 43.7 | 48751  |
| Erwinia tasmaniensis                 | 53.7 | 3883467 | Erwinia tasmaniensis<br>plasmid pET45                    | 50.8 | 44694  |
| Escherichia coli<br>0127:H6 E2348/69 | 50.6 | 4965553 | Escherichia coli<br>0127:H6 E2348/69<br>plasmid pE2348-2 | 52.8 | 6147   |
| Escherichia coli<br>0127:H6 E2348/69 | 50.6 | 4965553 | Escherichia coli<br>0127:H6 E2348/69                     | 48   | 97978  |
| Escherichia coli<br>E24377A          | 50.6 | 4979619 | Escherichia coli<br>E24377A plasmid                      | 47.3 | 79237  |
| Escherichia coli<br>E24377A          | 50.6 | 4979619 | Escherichia coli<br>E24377A plasmid                      | 51.6 | 34367  |
| Escherichia coli<br>E24377A          | 50.6 | 4979619 | Escherichia coli<br>E24377A plasmid                      | 50.2 | 70609  |

|                                         |      |         |                                                            |      |        |
|-----------------------------------------|------|---------|------------------------------------------------------------|------|--------|
| Escherichia coli<br>E24377A             | 50.6 | 4979619 | Escherichia coli<br>E24377A plasmid                        | 52.6 | 6199   |
| Escherichia coli<br>E24377A             | 50.6 | 4979619 | Escherichia coli<br>E24377A plasmid                        | 49.8 | 74224  |
| Escherichia coli<br>E24377A             | 50.6 | 4979619 | Escherichia coli<br>E24377A plasmid                        | 49.6 | 5033   |
| Escherichia coli<br>O103:H2 str. 12009  | 50.7 | 5449314 | Escherichia coli<br>O103:H2 str. 12009                     | 49.1 | 75546  |
| Escherichia coli<br>O111:H- str. 11128  | 50.6 | 5371077 | Escherichia coli<br>O111:H- str. 11128<br>plasmid pO111 1  | 47   | 204604 |
| Escherichia coli<br>O111:H- str. 11128  | 50.6 | 5371077 | Escherichia coli<br>O111:H- str. 11128<br>plasmid pO111 2  | 48.2 | 97897  |
| Escherichia coli<br>O111:H- str. 11128  | 50.6 | 5371077 | Escherichia coli<br>O111:H- str. 11128<br>plasmid pO111 3  | 50   | 77690  |
| Escherichia coli<br>O111:H- str. 11128  | 50.6 | 5371077 | Escherichia coli<br>O111:H- str. 11128<br>plasmid pO111 4  | 49.6 | 8140   |
| Escherichia coli<br>O111:H- str. 11128  | 50.6 | 5371077 | Escherichia coli<br>O111:H- str. 11128<br>plasmid pO111 5  | 50.2 | 6673   |
| Escherichia coli<br>O157:H7             | 50.5 | 5498450 | Escherichia coli<br>O157H7 plasmid                         | 43.4 | 3306   |
| Escherichia coli<br>O157:H7             | 50.5 | 5498450 | Escherichia coli<br>O157:H7 plasmid                        | 47.6 | 92721  |
| Escherichia coli<br>O157:H7 str. EC4115 | 50.5 | 5572075 | Escherichia coli<br>O157:H7 str. EC4115<br>plasmid pO157   | 47.9 | 94644  |
| Escherichia coli<br>O157:H7 str. EC4115 | 50.5 | 5572075 | Escherichia coli<br>O157:H7 str. EC4115<br>plasmid pEC4115 | 39.7 | 37452  |

|                                          |      |         |                                                           |      |        |
|------------------------------------------|------|---------|-----------------------------------------------------------|------|--------|
| Escherichia coli<br>O157:H7 str. TW14359 | 50.5 | 5528136 | Escherichia coli<br>O157:H7 str. TW14359<br>plasmid pO157 | 47.9 | 94601  |
| Escherichia coli<br>O26:H11 str. 11368   | 50.7 | 5697240 | Escherichia coli<br>O26:H11 str. 11368                    | 47.5 | 85167  |
| Escherichia coli<br>O26:H11 str. 11368   | 50.7 | 5697240 | Escherichia coli<br>O26:H11 str. 11368                    | 52.5 | 63365  |
| Escherichia coli<br>O26:H11 str. 11368   | 50.7 | 5697240 | Escherichia coli<br>O26:H11 str. 11368                    | 46.2 | 5686   |
| Escherichia coli O55:H7<br>str. CB9615   | 50.5 | 5386352 | Escherichia coli O55:H7<br>str. CB9615 plasmid            | 48.9 | 66001  |
| Escherichia coli SE11                    | 50.8 | 4887515 | Escherichia coli SE11<br>plasmid pSE11-1                  | 50.5 | 100021 |
| Escherichia coli SE11                    | 50.8 | 4887515 | Escherichia coli SE11<br>plasmid pSE11-2                  | 50.2 | 91158  |
| Escherichia coli SE11                    | 50.8 | 4887515 | Escherichia coli SE11<br>plasmid pSE11-3                  | 48.6 | 60555  |
| Escherichia coli SE11                    | 50.8 | 4887515 | Escherichia coli SE11<br>plasmid pSE11-4                  | 48   | 6929   |
| Escherichia coli SE11                    | 50.8 | 4887515 | Escherichia coli SE11<br>plasmid pSE11-5                  | 46.2 | 5366   |
| Escherichia coli SE11                    | 50.8 | 4887515 | Escherichia coli SE11<br>plasmid pSE11-6                  | 49.4 | 4082   |
| Escherichia coli SMS-3-<br>5             | 50.5 | 5068389 | Escherichia coli SMS-3-<br>5 plasmid pSMS35 8             | 46.8 | 8909   |
| Escherichia coli SMS-3-<br>5             | 50.5 | 5068389 | Escherichia coli SMS-3-<br>5 plasmid pSMS35 4             | 49.6 | 4074   |
| Escherichia coli SMS-3-<br>5             | 50.5 | 5068389 | Escherichia coli SMS-3-<br>5 plasmid pSMS35 3             | 43   | 3565   |
| Escherichia coli SMS-3-<br>5             | 50.5 | 5068389 | Escherichia coli SMS-3-<br>5 plasmid pSMS35 130           | 50.8 | 130440 |
| Escherichia coli UTI89                   | 50.6 | 5065741 | Escherichia coli UTI89<br>plasmid pUTI89                  | 51   | 114230 |



|                                                               |      |         |                                                                       |      |        |
|---------------------------------------------------------------|------|---------|-----------------------------------------------------------------------|------|--------|
| Eubacterium eligens<br>ATCC 27750                             | 37.7 | 2144190 | Eubacterium eligens<br>ATCC 27750 plasmid<br>unnamed                  | 36.8 | 626744 |
| Eubacterium eligens<br>ATCC 27750                             | 37.7 | 2144190 | Eubacterium eligens<br>ATCC 27750 plasmid<br>unnamed                  | 40.8 | 60455  |
| Exiguobacterium<br>sibiricum 255-15                           | 47.7 | 3034136 | Exiguobacterium<br>sibiricum 255-15                                   | 37.1 | 4885   |
| Exiguobacterium<br>sibiricum 255-15                           | 47.7 | 3034136 | Exiguobacterium<br>sibiricum 255-15                                   | 41.4 | 1765   |
| Finegoldia magna<br>ATCC 29328                                | 32.3 | 1797577 | Finegoldia magna<br>ATCC 29328 plasmid                                | 29.7 | 189163 |
| Francisella philomiragia<br>subsp. philomiragia<br>ATCC 25017 | 32.6 | 2045775 | Francisella philomiragia<br>subsp. philomiragia<br>ATCC 25017 plasmid | 28.4 | 3936   |
| Frankia symbiont of<br>Datisca glomerata                      | 70   | 5323186 | Frankia symbiont of<br>Datisca glomerata<br>plasmid pFSYMDG01         | 67.8 | 12355  |
| Frankia symbiont of<br>Datisca glomerata                      | 70   | 5323186 | Frankia symbiont of<br>Datisca glomerata<br>plasmid pFSYMDG02         | 43.1 | 5448   |
| Gallibacterium anatis<br>UMN179                               | 39.9 | 2687335 | Gallibacterium anatis<br>UMN179 plasmid<br>pUMN179                    | 35.8 | 6804   |
| Geobacillus<br>kaustophilus HTA426                            | 52.1 | 3544776 | Geobacillus<br>kaustophilus HTA426<br>plasmid pHTA426                 | 44.2 | 47890  |
| Geobacillus sp. WCH70                                         | 42.8 | 3464618 | Geobacillus sp. WCH70<br>plasmid pWCH7001                             | 39.6 | 33899  |
| Geobacillus sp. WCH70                                         | 42.8 | 3464618 | Geobacillus sp. WCH70<br>plasmid pWCH7002                             | 39.6 | 10287  |
| Geobacillus sp.<br>Y4.1MC1                                    | 44   | 3840330 | Geobacillus sp.<br>Y4.1MC1 plasmid                                    | 43.8 | 71617  |

|                                              |      |         |                                                                 |      |        |
|----------------------------------------------|------|---------|-----------------------------------------------------------------|------|--------|
| Geobacillus sp.<br>Y412MC52                  | 52.4 | 3628883 | Geobacillus sp.<br>Y412MC52 plasmid<br>pGYMC5201                | 45.3 | 45057  |
| Geobacillus sp.<br>Y412MC61                  | 52.4 | 3622844 | Geobacillus sp.<br>Y412MC61 plasmid<br>pGYMC6101                | 45.3 | 45057  |
| Geobacillus<br>thermodenitrificans<br>NG80-2 | 49   | 3550319 | Geobacillus<br>thermodenitrificans<br>NG80-2 plasmid            | 39.7 | 57693  |
| Geobacter lovleyi SZ                         | 54.8 | 3917761 | Geobacter lovleyi SZ<br>plasmid pGLOV01                         | 53   | 77113  |
| Geobacter<br>metallireducens GS-15           | 59.5 | 3997420 | Geobacter<br>metallireducens GS-15                              | 52.5 | 13762  |
| Glaciecola sp. 4H-3-<br>7+YE-5               | 44.2 | 5052309 | Glaciecola agarilytica<br>4H-3-7+YE-5 plasmid<br>pGLAAG01       | 42   | 341282 |
| Gluconacetobacter<br>diazotrophicus PAI 5    | 66.4 | 3944163 | Gluconacetobacter<br>diazotrophicus PAI 5<br>plasmid pGDIPal5I  | 56.8 | 38818  |
| Gluconacetobacter<br>diazotrophicus PAI 5    | 66.4 | 3944163 | Gluconacetobacter<br>diazotrophicus PAI 5<br>plasmid pGDIPal5II | 64   | 16610  |
| Gluconacetobacter<br>diazotrophicus PAI 5    | 66.4 | 3887492 | Gluconacetobacter<br>diazotrophicus PAI 5<br>plasmid pGDIA01    | 58.5 | 27455  |
| Gluconobacter oxydans<br>621H                | 61.1 | 2702173 | Gluconobacter oxydans<br>621H plasmid pGOX1                     | 58.3 | 163186 |
| Gluconobacter oxydans<br>621H                | 61.1 | 2702173 | Gluconobacter oxydans<br>621H plasmid pGOX2                     | 56.1 | 26568  |
| Gluconobacter oxydans<br>621H                | 61.1 | 2702173 | Gluconobacter oxydans<br>621H plasmid pGOX3                     | 56   | 14547  |
| Gluconobacter oxydans<br>621H                | 61.1 | 2702173 | Gluconobacter oxydans<br>621H plasmid pGOX4                     | 54.4 | 13223  |
| Gluconobacter oxydans<br>621H                | 61.1 | 2702173 | Gluconobacter oxydans<br>621H plasmid pGOX5                     | 60   | 2687   |

|                                            |      |         |                                                             |      |        |
|--------------------------------------------|------|---------|-------------------------------------------------------------|------|--------|
| Gordonia bronchialis<br>DSM 43247          | 67.1 | 5208602 | Gordonia bronchialis<br>DSM 43247 plasmid                   | 65.1 | 81410  |
| Haemophilus somnus<br>129PT                | 37.2 | 2007700 | Haemophilus somnus<br>129PT plasmid pHS129                  | 35   | 5178   |
| Haliscomenobacter<br>hydrossis DSM 1100    | 47.1 | 8371686 | Haliscomenobacter<br>hydrossis DSM 1100<br>plasmid pHALHY01 | 46.2 | 164019 |
| Haliscomenobacter<br>hydrossis DSM 1100    | 47.1 | 8371686 | Haliscomenobacter<br>hydrossis DSM 1100<br>plasmid pHALHY02 | 46.4 | 143757 |
| Haliscomenobacter<br>hydrossis DSM 1100    | 47.1 | 8371686 | Haliscomenobacter<br>hydrossis DSM 1100<br>plasmid pHALHY02 | 47   | 92189  |
| Helicobacter<br>acinonychis str. Sheeba    | 38.2 | 1553927 | Helicobacter<br>acinonychis str. Sheeba                     | 34.6 | 3661   |
| Helicobacter pylori B8                     | 38.8 | 1673997 | Helicobacter pylori<br>plasmid HPB8p                        | 35.9 | 6032   |
| Helicobacter pylori G27                    | 38.9 | 1652982 | Helicobacter pylori G27<br>plasmid pHPG27                   | 34.9 | 10031  |
| Helicobacter pylori<br>HPAG1               | 39.1 | 1596366 | Helicobacter pylori<br>HPAG1 plasmid                        | 36.4 | 9370   |
| Helicobacter pylori P12                    | 38.8 | 1673813 | Helicobacter pylori P12<br>plasmid HPP12                    | 35.1 | 10225  |
| Helicobacter pylori<br>PeCan4              | 38.9 | 1629557 | Helicobacter pylori<br>PeCan4 plasmid                       | 32.9 | 8712   |
| Herpetosiphon<br>aurantiacus ATCC<br>23779 | 50.7 | 6346587 | Herpetosiphon<br>aurantiacus ATCC<br>23779 plasmid pHAU01   | 53.7 | 339639 |
| Herpetosiphon<br>aurantiacus ATCC<br>23779 | 50.7 | 6346587 | Herpetosiphon<br>aurantiacus ATCC<br>23779 plasmid pHAU02   | 53.1 | 99204  |
| Hirschia baltica ATCC<br>49814             | 45.2 | 3455622 | Hirschia baltica ATCC<br>49814 plasmid pHbal01              | 43.5 | 84492  |
| Ilyobacter polytropus<br>DSM 2926          | 34.5 | 2046464 | Ilyobacter polytropus<br>DSM 2926 plasmid                   | 34.3 | 961624 |

|                                                         |      |         |                                                                 |      |        |
|---------------------------------------------------------|------|---------|-----------------------------------------------------------------|------|--------|
| Ilyobacter polytropus<br>DSM 2926                       | 34.5 | 2046464 | Ilyobacter polytropus<br>DSM 2926 plasmid                       | 32.4 | 124226 |
| Isosphaera pallida<br>ATCC 43644                        | 62.4 | 5472964 | Isosphaera pallida<br>ATCC 43644 plasmid                        | 67   | 56340  |
| Jannaschia sp. CCS1                                     | 62.3 | 4317977 | Jannaschia sp. CCS1<br>plasmid1                                 | 57.8 | 86072  |
| Ketogulonicigenium<br>vulgare Y25                       | 61.7 | 2776084 | Ketogulonicigenium<br>vulgare Y25 plasmid                       | 61.4 | 268675 |
| Ketogulonicigenium<br>vulgare Y25                       | 61.7 | 2776084 | Ketogulonicigenium<br>vulgare Y25 plasmid<br>pYP12              | 62.6 | 243645 |
| Kineococcus<br>radiotolerans SRS30216                   | 74.4 | 4761183 | Kineococcus<br>radiotolerans SRS30216<br>plasmid pKRAD02        | 72.3 | 12917  |
| Klebsiella pneumoniae<br>342                            | 57.3 | 5641239 | Klebsiella pneumoniae<br>342 plasmid pKP91                      | 51.1 | 91096  |
| Klebsiella pneumoniae<br>342                            | 57.3 | 5641239 | Klebsiella pneumoniae<br>342 plasmid pKP187                     | 47.2 | 187922 |
| Klebsiella pneumoniae<br>subsp. pneumoniae<br>MGH 78578 | 57.5 | 5315120 | Klebsiella pneumoniae<br>subsp. pneumoniae<br>MGH 78578 plasmid | 51.7 | 175879 |
| Klebsiella pneumoniae<br>subsp. pneumoniae<br>MGH 78578 | 57.5 | 5315120 | Klebsiella pneumoniae<br>subsp. pneumoniae<br>MGH 78578 plasmid | 53.4 | 107576 |
| Klebsiella pneumoniae<br>subsp. pneumoniae<br>MGH 78578 | 57.5 | 5315120 | Klebsiella pneumoniae<br>subsp. pneumoniae<br>MGH 78578 plasmid | 53.8 | 88582  |
| Klebsiella pneumoniae<br>subsp. pneumoniae<br>MGH 78578 | 57.5 | 5315120 | Klebsiella pneumoniae<br>subsp. pneumoniae<br>MGH 78578 plasmid | 41.4 | 4259   |
| Klebsiella pneumoniae<br>subsp. pneumoniae<br>MGH 78578 | 57.5 | 5315120 | Klebsiella pneumoniae<br>subsp. pneumoniae<br>MGH 78578 plasmid | 45.7 | 3478   |

|                                                  |      |         |                                                                 |      |        |
|--------------------------------------------------|------|---------|-----------------------------------------------------------------|------|--------|
| Lactobacillus acidophilus 30SC                   | 38.1 | 2078001 | Lactobacillus acidophilus 30SC plasmid pRKC30SC1                | 35.1 | 7197   |
| Lactobacillus acidophilus 30SC                   | 38.1 | 2078001 | Lactobacillus acidophilus 30SC plasmid pRKC30SC2                | 36.6 | 12568  |
| Lactobacillus brevis ATCC 367                    | 46.2 | 2291220 | Lactobacillus brevis ATCC 367 plasmid 1                         | 38.6 | 13413  |
| Lactobacillus brevis ATCC 367                    | 46.2 | 2291220 | Lactobacillus brevis ATCC 367 plasmid 2                         | 38.5 | 35595  |
| Lactobacillus buchneri NRRL B-30929              | 44.4 | 2506301 | Lactobacillus buchneri NRRL B-30929 plasmid pLBUC01             | 38.1 | 52697  |
| Lactobacillus buchneri NRRL B-30929              | 44.4 | 2506301 | Lactobacillus buchneri NRRL B-30929 plasmid pLBUC02             | 40.4 | 18513  |
| Lactobacillus buchneri NRRL B-30929              | 44.4 | 2506301 | Lactobacillus buchneri NRRL B-30929 plasmid pLBUC03             | 37.6 | 10798  |
| Lactobacillus casei ATCC 334                     | 46.6 | 2895264 | Lactobacillus casei ATCC 334 plasmid 1                          | 42.2 | 29061  |
| Lactobacillus delbrueckii subsp. bulgaricus ND02 | 49.6 | 2125753 | Lactobacillus delbrueckii subsp. bulgaricus ND02                | 44.7 | 6223   |
| Lactobacillus johnsonii FI9785                   | 34.5 | 1755993 | Lactobacillus johnsonii FI9785 plasmid p9785L                   | 30.4 | 25652  |
| Lactobacillus kefiranofaciens ZW3                | 37.7 | 2113023 | Lactobacillus kefiranofaciens ZW3 plasmid pWW1                  | 34   | 194769 |
| Lactobacillus kefiranofaciens ZW3                | 37.7 | 2113023 | Lactobacillus kefiranofaciens ZW3 plasmid pWW2                  | 36   | 46296  |
| Lactobacillus plantarum subsp. plantarum ST-III  | 44.6 | 3254376 | Lactobacillus plantarum subsp. plantarum ST-III plasmid pST-III | 38.7 | 53560  |

|                                                   |      |         |                                                           |      |        |
|---------------------------------------------------|------|---------|-----------------------------------------------------------|------|--------|
| Lactobacillus rhamnosus Lc 705                    | 46.7 | 2968598 | Lactobacillus rhamnosus Lc 705                            | 43.5 | 64508  |
| Lactobacillus salivarius subsp. salivarius UCC118 | 32.9 | 1827111 | Lactobacillus salivarius subsp. salivarius UCC118 plasmid | 39.1 | 20417  |
| Lactobacillus salivarius subsp. salivarius UCC118 | 32.9 | 1827111 | Lactobacillus salivarius subsp. salivarius UCC118 plasmid | 39.6 | 44013  |
| Lactobacillus salivarius subsp. salivarius UCC118 | 32.9 | 1827111 | Lactobacillus salivarius subsp. salivarius UCC118 plasmid | 32.1 | 242436 |
| Lactococcus lactis subsp. cremoris SK11           | 35.9 | 2438589 | Lactococcus lactis subsp. cremoris SK11                   | 34.4 | 14041  |
| Lactococcus lactis subsp. cremoris SK11           | 35.9 | 2438589 | Lactococcus lactis subsp. cremoris SK11                   | 30.4 | 9554   |
| Lactococcus lactis subsp. cremoris SK11           | 35.9 | 2438589 | Lactococcus lactis subsp. cremoris SK11                   | 35.4 | 74750  |
| Lactococcus lactis subsp. cremoris SK11           | 35.9 | 2438589 | Lactococcus lactis subsp. cremoris SK11                   | 34.8 | 47208  |
| Lactococcus lactis subsp. cremoris SK11           | 35.9 | 2438589 | Lactococcus lactis subsp. cremoris SK11                   | 33.5 | 14206  |
| Lactococcus lactis subsp. lactis KF147            | 34.9 | 2598144 | Lactococcus lactis subsp. lactis KF147 plasmid pKF147A    | 32.4 | 37510  |
| Lawsonia intracellularis PHE/MN1-00               | 33.3 | 1457619 | Lawsonia intracellularis PHE/MN1-00 plasmid 1             | 29   | 27048  |
| Lawsonia intracellularis PHE/MN1-00               | 33.3 | 1457619 | Lawsonia intracellularis PHE/MN1-00 plasmid 2             | 29.2 | 39794  |
| Lawsonia intracellularis PHE/MN1-00               | 33.3 | 1457619 | Lawsonia intracellularis PHE/MN1-00 plasmid 3             | 32.9 | 194553 |
| Legionella pneumophila str. Lens                  | 38.4 | 3345687 | Legionella pneumophila str. Lens plasmid pLPL             | 38.4 | 59832  |
| Legionella pneumophila str. Paris                 | 38.4 | 3503610 | Legionella pneumophila str. Paris plasmid pLPP            | 37.4 | 131885 |

|                                                         |      |         |                                                                 |      |       |
|---------------------------------------------------------|------|---------|-----------------------------------------------------------------|------|-------|
| Leptospira biflexa serovar Patoc strain Patoc 1 (Ames)  | 38.9 | 3603977 | Leptospira biflexa serovar Patoc strain Patoc 1 (Ames) plasmid  | 37.5 | 74117 |
| Leptospira biflexa serovar Patoc strain Patoc 1 (Ames)  | 39.3 | 277995  | Leptospira biflexa serovar Patoc strain Patoc 1 (Ames) plasmid  | 37.5 | 74117 |
| Leptospira biflexa serovar Patoc strain Patoc 1 (Paris) | 38.9 | 3599677 | Leptospira biflexa serovar Patoc strain Patoc 1 (Paris) plasmid | 37.5 | 74116 |
| Leptospira biflexa serovar Patoc strain Patoc 1 (Paris) | 39.3 | 277655  | Leptospira biflexa serovar Patoc strain Patoc 1 (Paris) plasmid | 37.5 | 74116 |
| Leuconostoc citreum KM20                                | 39   | 1796284 | Leuconostoc citreum KM20 plasmid pLCK1                          | 37.4 | 38713 |
| Leuconostoc citreum KM20                                | 39   | 1796284 | Leuconostoc citreum KM20 plasmid pLCK2                          | 38   | 31463 |
| Leuconostoc citreum KM20                                | 39   | 1796284 | Leuconostoc citreum KM20 plasmid pLCK3                          | 33   | 17971 |
| Leuconostoc citreum KM20                                | 39   | 1796284 | Leuconostoc citreum KM20 plasmid pLCK4                          | 36.9 | 12183 |
| Leuconostoc kimchii IMSNU11154                          | 38   | 2002721 | Leuconostoc kimchii IMSNU11154 plasmid LkipL4701                | 34.3 | 21055 |
| Leuconostoc kimchii IMSNU11154                          | 38   | 2002721 | Leuconostoc kimchii IMSNU11154 plasmid LkipL4704                | 35.5 | 23275 |
| Leuconostoc kimchii IMSNU11154                          | 38   | 2002721 | Leuconostoc kimchii IMSNU11154 plasmid LkipL4719                | 39.1 | 21924 |
| Leuconostoc kimchii IMSNU11154                          | 38   | 2002721 | Leuconostoc kimchii IMSNU11154 plasmid LkipL4726                | 35.5 | 29616 |
| Leuconostoc kimchii IMSNU11154                          | 38   | 2002721 | Leuconostoc kimchii IMSNU11154 plasmid LkipL48                  | 37.1 | 3196  |

|                                                                   |      |         |
|-------------------------------------------------------------------|------|---------|
| Leuconostoc<br>mesenteroides subsp.<br>mesenteroides ATCC<br>8293 | 37.7 | 2038396 |
| Listeria innocua<br>Clip11262                                     | 37.4 | 3011208 |
| Lysinibacillus<br>sphaericus C3-41                                | 37.3 | 4639821 |
| Macrococcus<br>caseolyticus JCSC5402                              | 36.9 | 2102324 |
| Macrococcus<br>caseolyticus JCSC5402                              | 36.9 | 2102324 |
| Macrococcus<br>caseolyticus JCSC5402                              | 36.9 | 2102324 |
| Macrococcus<br>caseolyticus JCSC5402                              | 36.9 | 2102324 |
| Macrococcus<br>caseolyticus JCSC5402                              | 36.9 | 2102324 |
| Macrococcus<br>caseolyticus JCSC5402                              | 36.9 | 2102324 |
| Macrococcus<br>caseolyticus JCSC5402                              | 36.9 | 2102324 |
| Macrococcus<br>caseolyticus JCSC5402                              | 36.9 | 2102324 |
| Macrococcus<br>caseolyticus JCSC5402                              | 36.9 | 2102324 |
| Marinobacter aquaeolei<br>VT8                                     | 57.3 | 4326849 |

|                                                                                  |      |        |
|----------------------------------------------------------------------------------|------|--------|
| Leuconostoc<br>mesenteroides subsp.<br>mesenteroides ATCC<br>8293 plasmid pLEUM1 | 35.4 | 37367  |
| Listeria innocua plasmid<br>pLI100                                               | 35.5 | 81905  |
| Lysinibacillus<br>sphaericus C3-41                                               | 33.1 | 177642 |
| Macrococcus<br>caseolyticus JCSC5402<br>plasmid pMCCL1                           | 28.2 | 15667  |
| Macrococcus<br>caseolyticus JCSC5402<br>plasmid pMCCL2                           | 30.8 | 80545  |
| Macrococcus<br>caseolyticus JCSC5402<br>plasmid pMCCL3                           | 32.7 | 2131   |
| Macrococcus<br>caseolyticus JCSC5402<br>plasmid pMCCL4                           | 33.1 | 3417   |
| Macrococcus<br>caseolyticus JCSC5402<br>plasmid pMCCL5                           | 31.6 | 4398   |
| Macrococcus<br>caseolyticus JCSC5402<br>plasmid pMCCL6                           | 35.2 | 4226   |
| Macrococcus<br>caseolyticus JCSC5402<br>plasmid pMCCL7                           | 36.3 | 4061   |
| Macrococcus<br>caseolyticus JCSC5402<br>plasmid pMCCL8                           | 31   | 2968   |
| Marinobacter aquaeolei<br>VT8 plasmid                                            | 54.1 | 239623 |



|                                                      |      |         |                                                                      |      |        |
|------------------------------------------------------|------|---------|----------------------------------------------------------------------|------|--------|
| Marinobacter aquaeolei<br>VT8                        | 57.3 | 4326849 | Marinobacter aquaeolei<br>VT8 plasmid                                | 53.2 | 213290 |
| Marivirga tractuosa<br>DSM 4126                      | 35.5 | 4511574 | Marivirga tractuosa<br>DSM 4126 plasmid                              | 39.7 | 4916   |
| Meiothermus silvanus<br>DSM 9946                     | 62.4 | 3249394 | Meiothermus silvanus<br>DSM 9946 plasmid                             | 64.6 | 347854 |
| Meiothermus silvanus<br>DSM 9946                     | 62.4 | 3249394 | pMESIL01<br>Meiothermus silvanus<br>DSM 9946 plasmid                 | 66.7 | 124421 |
| Melissococcus plutonius<br>ATCC 35311                | 31.4 | 1891014 | pMESIL02<br>Melissococcus plutonius<br>ATCC 35311 plasmid            | 29.2 | 177718 |
| Mesorhizobium ciceri<br>biovar biserrulae<br>WSM1271 | 62.7 | 6264489 | pMP1<br>Mesorhizobium ciceri<br>biovar biserrulae<br>WSM1271 plasmid | 60.7 | 425539 |
| Mesorhizobium loti<br>MAFF303099                     | 62.7 | 7036071 | pMESCI01<br>Mesorhizobium loti<br>MAFF303099 plasmid                 | 59.3 | 351911 |
| Mesorhizobium loti<br>MAFF303099                     | 62.7 | 7036071 | pMLa<br>Mesorhizobium loti<br>MAFF303099 plasmid                     | 59.9 | 208315 |
| Mesorhizobium sp.<br>BNC1                            | 61.1 | 4412446 | pMLb<br>Mesorhizobium sp.<br>BNC1 plasmid 1                          | 61.7 | 343931 |
| Mesorhizobium sp.<br>BNC1                            | 61.1 | 4412446 | Mesorhizobium sp.<br>BNC1 plasmid 2                                  | 60.2 | 131247 |
| Mesorhizobium sp.<br>BNC1                            | 61.1 | 4412446 | Mesorhizobium sp.<br>BNC1 plasmid 3                                  | 61.5 | 47561  |
| Methylibium<br>petroleiphilum PM1                    | 69.2 | 4044195 | Methylibium<br>petroleiphilum PM1                                    | 66   | 599444 |
| Methylobacterium<br>chloromethanicum CM4             | 68.2 | 5777908 | Methylobacterium<br>chloromethanicum CM4<br>plasmid pMCHL01          | 66.3 | 380207 |

|                                          |      |         |                                                             |      |         |
|------------------------------------------|------|---------|-------------------------------------------------------------|------|---------|
| Methylobacterium<br>chloromethanicum CM4 | 68.2 | 5777908 | Methylobacterium<br>chloromethanicum CM4<br>plasmid pMCHL02 | 63.9 | 22617   |
| Methylobacterium<br>extorquens AM1       | 68.7 | 5511322 | Methylobacterium<br>extorquens AM1<br>megaplasmid           | 67.6 | 1261460 |
| Methylobacterium<br>extorquens AM1       | 68.7 | 5511322 | Methylobacterium<br>extorquens AM1<br>plasmid p1META1       | 67.9 | 44195   |
| Methylobacterium<br>extorquens AM1       | 68.7 | 5511322 | Methylobacterium<br>extorquens AM1<br>plasmid p2META1       | 65.2 | 37858   |
| Methylobacterium<br>extorquens AM1       | 68.7 | 5511322 | Methylobacterium<br>extorquens AM1<br>plasmid p3META1       | 66.9 | 24943   |
| Methylobacterium<br>extorquens DM4       | 68.1 | 5943768 | Methylobacterium<br>extorquens DM4<br>plasmid p1METDI       | 65.3 | 141504  |
| Methylobacterium<br>extorquens DM4       | 68.1 | 5943768 | Methylobacterium<br>extorquens DM4<br>plasmid p2METDI       | 63.7 | 38579   |
| Methylobacterium<br>nodulans ORS 2060    | 68.9 | 7772460 | Methylobacterium<br>nodulans ORS 2060<br>plasmid pMNOD01    | 65.9 | 487734  |
| Methylobacterium<br>nodulans ORS 2060    | 68.9 | 7772460 | Methylobacterium<br>nodulans ORS 2060<br>plasmid pMNOD02    | 65.7 | 458070  |
| Methylobacterium<br>nodulans ORS 2060    | 68.9 | 7772460 | Methylobacterium<br>nodulans ORS 2060<br>plasmid pMNOD03    | 64.2 | 40463   |
| Methylobacterium<br>nodulans ORS 2060    | 68.9 | 7772460 | Methylobacterium<br>nodulans ORS 2060<br>plasmid pMNOD04    | 61.6 | 37542   |

|                                         |      |         |                                                         |      |        |
|-----------------------------------------|------|---------|---------------------------------------------------------|------|--------|
| Methylobacterium nodulans ORS 2060      | 68.9 | 7772460 | Methylobacterium nodulans ORS 2060 plasmid pMNOD05      | 61.4 | 20286  |
| Methylobacterium nodulans ORS 2060      | 68.9 | 7772460 | Methylobacterium nodulans ORS 2060 plasmid pMNOD06      | 60.5 | 12638  |
| Methylobacterium nodulans ORS 2060      | 68.9 | 7772460 | Methylobacterium nodulans ORS 2060 plasmid pMNOD07      | 67.2 | 9829   |
| Methylobacterium populi BJ001           | 69.4 | 5800441 | Methylobacterium populi BJ001 plasmid                   | 64.9 | 25164  |
| Methylobacterium populi BJ001           | 69.4 | 5800441 | Methylobacterium populi BJ001 plasmid                   | 66.8 | 23392  |
| Methylobacterium radiotolerans JCM 2831 | 71.5 | 6077833 | Methylobacterium radiotolerans JCM 2831 plasmid pMRAD01 | 69.6 | 586164 |
| Methylobacterium radiotolerans JCM 2831 | 71.5 | 6077833 | Methylobacterium radiotolerans JCM 2831 plasmid pMRAD02 | 62.5 | 47003  |
| Methylobacterium radiotolerans JCM 2831 | 71.5 | 6077833 | Methylobacterium radiotolerans JCM 2831 plasmid pMRAD03 | 63.2 | 42985  |
| Methylobacterium radiotolerans JCM 2831 | 71.5 | 6077833 | Methylobacterium radiotolerans JCM 2831 plasmid pMRAD04 | 63.7 | 37743  |
| Methylobacterium radiotolerans JCM 2831 | 71.5 | 6077833 | Methylobacterium radiotolerans JCM 2831 plasmid pMRAD05 | 62   | 36410  |
| Methylobacterium radiotolerans JCM 2831 | 71.5 | 6077833 | Methylobacterium radiotolerans JCM 2831 plasmid pMRAD06 | 61   | 27836  |
| Methylobacterium radiotolerans JCM 2831 | 71.5 | 6077833 | Methylobacterium radiotolerans JCM 2831 plasmid pMRAD07 | 61.1 | 22114  |

|                                         |      |         |                                                         |      |        |
|-----------------------------------------|------|---------|---------------------------------------------------------|------|--------|
| Methylobacterium radiotolerans JCM 2831 | 71.5 | 6077833 | Methylobacterium radiotolerans JCM 2831 plasmid pMRAD08 | 65.1 | 21022  |
| Methylobacterium sp. 4-46               | 71.6 | 7659055 | Methylobacterium sp. 4-46 plasmid pM44601               | 65.1 | 57951  |
| Methylobacterium sp. 4-46               | 71.6 | 7659055 | Methylobacterium sp. 4-46 plasmid pM44602               | 59.2 | 20019  |
| Methylovorus sp. SIP3-4                 | 54.9 | 2995511 | Methylovorus sp. SIP3-4 plasmid pMsip01                 | 45.7 | 76680  |
| Methylovorus sp. SIP3-4                 | 54.9 | 2995511 | Methylovorus sp. SIP3-4 plasmid pMsip02                 | 47.4 | 9816   |
| Mycobacterium gilvum PYR-GCK            | 67.9 | 5619607 | Mycobacterium gilvum PYR-GCK plasmid pMFLV01            | 65.1 | 321253 |
| Mycobacterium gilvum PYR-GCK            | 67.9 | 5619607 | Mycobacterium gilvum PYR-GCK plasmid pMFLV02            | 64.2 | 25309  |
| Mycobacterium gilvum PYR-GCK            | 67.9 | 5619607 | Mycobacterium gilvum PYR-GCK plasmid pMFLV03            | 65.2 | 16660  |
| Mycobacterium marinum M                 | 65.7 | 6636827 | Mycobacterium marinum M plasmid                         | 67.9 | 23317  |
| Mycobacterium sp. KMS                   | 68.4 | 5737227 | Mycobacterium sp. KMS plasmid                           | 65.4 | 302089 |
| Mycobacterium sp. KMS                   | 68.4 | 5737227 | Mycobacterium sp. KMS plasmid                           | 66.6 | 216763 |
| Mycobacterium sp. MCS                   | 68.5 | 5705448 | Mycobacterium sp. MCS plasmid1                          | 66.6 | 215075 |
| Mycobacterium sp. Spyr1                 | 67.9 | 5547747 | Mycobacterium sp. Spyr1 plasmid                         | 65.6 | 211864 |
| Mycobacterium sp. Spyr1                 | 67.9 | 5547747 | Mycobacterium sp. Spyr1 plasmid                         | 64.5 | 23681  |

|                                                |      |         |                                                                   |      |        |
|------------------------------------------------|------|---------|-------------------------------------------------------------------|------|--------|
| Natranaerobius<br>thermophilus JW-NM-<br>WN-LF | 36.3 | 3165557 | Natranaerobius<br>thermophilus JW-NM-<br>WN-LF plasmid<br>pNTHE01 | 34.2 | 17207  |
| Natranaerobius<br>thermophilus JW-NM-<br>WN-LF | 36.3 | 3165557 | Natranaerobius<br>thermophilus JW-NM-<br>WN-LF plasmid<br>pNTHE02 | 35.7 | 8689   |
| Neisseria gonorrhoeae<br>NCCP11945             | 52.4 | 2232025 | Neisseria gonorrhoeae<br>NCCP11945 plasmid<br>pNGK                | 51.5 | 4153   |
| Nitrobacter<br>hamburgensis X14                | 61.7 | 4406967 | Nitrobacter<br>hamburgensis X14                                   | 60.4 | 294829 |
| Nitrobacter<br>hamburgensis X14                | 61.7 | 4406967 | Nitrobacter<br>hamburgensis X14                                   | 61.2 | 188318 |
| Nitrobacter<br>hamburgensis X14                | 61.7 | 4406967 | Nitrobacter<br>hamburgensis X14                                   | 61.7 | 121408 |
| Nitrosococcus<br>halophilus Nc4                | 51.6 | 4079427 | Nitrosococcus<br>halophilus Nc4 plasmid                           | 53   | 65833  |
| Nitrosococcus oceani<br>ATCC 19707             | 50.3 | 3481691 | Nitrosococcus oceani<br>ATCC 19707 plasmid A                      | 52.4 | 40420  |
| Nitrosococcus watsoni<br>C-113                 | 50.1 | 3328570 | Nitrosococcus watsoni<br>C-113 plasmid                            | 51.4 | 39105  |
| Nitrosococcus watsoni<br>C-113                 | 50.1 | 3328570 | Nitrosococcus watsoni<br>C-113 plasmid                            | 53.7 | 5611   |
| Nitrosomonas eutropha<br>C71                   | 48.5 | 2661057 | Nitrosomonas eutropha<br>C71 plasmid1                             | 49.8 | 65132  |
| Nitrosomonas eutropha<br>C71                   | 48.5 | 2661057 | Nitrosomonas eutropha<br>C71 plasmid2                             | 49.7 | 55635  |
| Nitrosomonas sp.<br>AL212                      | 44.8 | 3180526 | Nitrosomonas sp.<br>AL212 plasmid                                 | 42.8 | 92707  |
| Nitrosomonas sp.<br>AL212                      | 44.8 | 3180526 | Nitrosomonas sp.<br>AL212 plasmid                                 | 45.4 | 63790  |

|                                                         |      |         |                                                         |      |        |
|---------------------------------------------------------|------|---------|---------------------------------------------------------|------|--------|
| Nitrosospira<br>multiformis ATCC<br>25196 chromosome 1  | 53.9 | 3184243 | Nitrosospira<br>multiformis ATCC<br>25196 plasmid 1     | 49.5 | 18871  |
| Nitrosospira<br>multiformis ATCC<br>25196 chromosome 1  | 53.9 | 3184243 | Nitrosospira<br>multiformis ATCC<br>25196 plasmid 2     | 50   | 17036  |
| Nitrosospira<br>multiformis ATCC<br>25196 chromosome 1  | 53.9 | 3184243 | Nitrosospira<br>multiformis ATCC<br>25196 plasmid 3     | 49.6 | 14159  |
| Nocardia farcinica<br>IFM10152                          | 70.8 | 6021225 | Nocardia farcinica<br>IFM10152 plasmid                  | 67.2 | 184026 |
| Nocardia farcinica<br>IFM10152                          | 70.8 | 6021225 | Nocardia farcinica<br>IFM10152 plasmid                  | 68.4 | 87093  |
| Nocardioides sp. JS614                                  | 71.7 | 4985871 | Nocardioides sp. JS614<br>plasmid pNOCA01               | 68   | 307814 |
| Nocardiopsis<br>dassonvillei subsp.<br>dassonvillei DSM | 72.8 | 5767958 | Nocardiopsis<br>dassonvillei subsp.<br>dassonvillei DSM | 72   | 775354 |
| Nostoc punctiforme<br>PCC 73102                         | 41.4 | 8234322 | Nostoc punctiforme<br>PCC 73102 plasmid                 | 40.5 | 354564 |
| Nostoc punctiforme<br>PCC 73102                         | 41.4 | 8234322 | Nostoc punctiforme<br>PCC 73102 plasmid                 | 40.7 | 254918 |
| Nostoc punctiforme<br>PCC 73102                         | 41.4 | 8234322 | Nostoc punctiforme<br>PCC 73102 plasmid                 | 40.9 | 123028 |
| Nostoc punctiforme<br>PCC 73102                         | 41.4 | 8234322 | Nostoc punctiforme<br>PCC 73102 plasmid                 | 41.5 | 65940  |
| Nostoc punctiforme<br>PCC 73102                         | 41.4 | 8234322 | Nostoc punctiforme<br>PCC 73102 plasmid                 | 42.3 | 26419  |
| Nostoc sp. PCC 7120                                     | 41.3 | 6413771 | Nostoc sp. PCC 7120<br>plasmid pCC7120alpha             | 40.5 | 408101 |
| Nostoc sp. PCC 7120                                     | 41.3 | 6413771 | Nostoc sp. PCC 7120<br>plasmid pCC7120beta              | 40.2 | 186614 |
| Nostoc sp. PCC 7120                                     | 41.3 | 6413771 | Nostoc sp. PCC 7120<br>plasmid pCC7120delta             | 41.6 | 55414  |

|                                               |      |         |                                                    |      |         |
|-----------------------------------------------|------|---------|----------------------------------------------------|------|---------|
| Nostoc sp. PCC 7120                           | 41.3 | 6413771 | Nostoc sp. PCC 7120 plasmid                        | 40.9 | 40340   |
| Nostoc sp. PCC 7120                           | 41.3 | 6413771 | Nostoc sp. PCC 7120 plasmid                        | 41   | 101965  |
| Nostoc sp. PCC 7120                           | 41.3 | 6413771 | Nostoc sp. PCC 7120 plasmid pCC7120zeta            | 44.2 | 5584    |
| Novosphingobium sp. PP1Y                      | 63.7 | 3911486 | Novosphingobium sp. PP1Y plasmid Mpl               | 62.3 | 1161602 |
| Novosphingobium sp. PP1Y                      | 63.7 | 3911486 | Novosphingobium sp. PP1Y plasmid Lpl               | 60.7 | 192103  |
| Novosphingobium sp. PP1Y                      | 63.7 | 3911486 | Novosphingobium sp. PP1Y plasmid Spl               | 60.1 | 48714   |
| Oceanithermus profundus DSM 14977             | 70   | 2303940 | Oceanithermus profundus DSM 14977 plasmid pOCEPR01 | 66.2 | 135351  |
| Ochrobactrum anthropi ATCC 49188              | 56.1 | 2887297 | Ochrobactrum anthropi ATCC 49188 plasmid pOANT01   | 56.2 | 170351  |
| Ochrobactrum anthropi ATCC 49188              | 56.1 | 2887297 | Ochrobactrum anthropi ATCC 49188 plasmid pOANT02   | 58.5 | 101491  |
| Ochrobactrum anthropi ATCC 49188              | 56.1 | 2887297 | Ochrobactrum anthropi ATCC 49188 plasmid pOANT03   | 54.3 | 93589   |
| Ochrobactrum anthropi ATCC 49188              | 56.1 | 2887297 | Ochrobactrum anthropi ATCC 49188 plasmid pOANT04   | 55.3 | 57138   |
| Ochrobactrum anthropi ATCC 49188 chromosome 2 | 56.2 | 1895911 | Ochrobactrum anthropi ATCC 49188 plasmid pOANT01   | 56.2 | 170351  |
| Ochrobactrum anthropi ATCC 49188 chromosome 2 | 56.2 | 1895911 | Ochrobactrum anthropi ATCC 49188 plasmid pOANT02   | 58.5 | 101491  |

|                                                     |      |         |                                                        |      |        |
|-----------------------------------------------------|------|---------|--------------------------------------------------------|------|--------|
| Ochrobactrum anthropi<br>ATCC 49188<br>chromosome 2 | 56.2 | 1895911 | Ochrobactrum anthropi<br>ATCC 49188 plasmid<br>pOANT03 | 54.3 | 93589  |
| Ochrobactrum anthropi<br>ATCC 49188<br>chromosome 2 | 56.2 | 1895911 | Ochrobactrum anthropi<br>ATCC 49188 plasmid<br>pOANT04 | 55.3 | 57138  |
| Paenibacillus polymyxa<br>SC2                       | 45.2 | 5731816 | Paenibacillus polymyxa<br>SC2 plasmid pSC2             | 37.6 | 510115 |
| Pantoea sp. At-9b                                   | 54.8 | 4368708 | Pantoea sp. At-9b<br>plasmid pPAT9B01                  | 54.6 | 793953 |
| Pantoea sp. At-9b                                   | 54.8 | 4368708 | Pantoea sp. At-9b<br>plasmid pPAT9B02                  | 51   | 394054 |
| Pantoea sp. At-9b                                   | 54.8 | 4368708 | Pantoea sp. At-9b<br>plasmid pPAT9B03                  | 52   | 321080 |
| Pantoea sp. At-9b                                   | 54.8 | 4368708 | Pantoea sp. At-9b<br>plasmid pPAT9B04                  | 53.4 | 318111 |
| Pantoea sp. At-9b                                   | 54.8 | 4368708 | Pantoea sp. At-9b<br>plasmid pPAT9B05                  | 54.8 | 116877 |
| Pantoea vagans C9-1                                 | 55.5 | 4024986 | Pantoea vagans C9-1<br>plasmid pPag1                   | 53   | 167983 |
| Pantoea vagans C9-1                                 | 55.5 | 4024986 | Pantoea vagans C9-1<br>plasmid pPag2                   | 51.1 | 165693 |
| Pantoea vagans C9-1                                 | 55.5 | 4024986 | Pantoea vagans C9-1<br>plasmid pPag3                   | 53.9 | 529676 |
| Paracoccus denitrificans<br>PD1222                  | 66.7 | 2852282 | Paracoccus denitrificans<br>PD1222 plasmid 1           | 67.1 | 653815 |
| Paracoccus denitrificans<br>PD1222 chromosome 2     | 66.8 | 1730097 | Paracoccus denitrificans<br>PD1222 plasmid 1           | 67.1 | 653815 |
| Pelobacter propionicus<br>DSM 2379                  | 59   | 4008000 | Pelobacter propionicus<br>DSM 2379 plasmid<br>pPRO1    | 48.1 | 202397 |
| Pelobacter propionicus<br>DSM 2379                  | 59   | 4008000 | Pelobacter propionicus<br>DSM 2379 plasmid<br>pPRO2    | 56.3 | 30722  |



|                                      |      |         |                                                         |      |        |
|--------------------------------------|------|---------|---------------------------------------------------------|------|--------|
| Persephonella marina<br>EX-H1        | 37.2 | 1930284 | Persephonella marina<br>EX-H1 plasmid                   | 34.4 | 53682  |
| Phenylobacterium<br>zucineum HLK1    | 71.3 | 3996255 | Phenylobacterium<br>zucineum HLK1<br>plasmid unnamed    | 68.5 | 382976 |
| Photobacterium<br>profundum SS9      | 42   | 4085304 | Photobacterium<br>profundum SS9 plasmid                 | 44   | 80033  |
| Photobacterium<br>profundum SS9      | 41.2 | 2237943 | Photobacterium<br>profundum SS9 plasmid                 | 44   | 80033  |
| Photorhabdus<br>asymbiotica          | 42.2 | 5064808 | Photorhabdus<br>asymbiotica plasmid                     | 40.5 | 29330  |
| Planctomyces<br>limnophilus DSM 3776 | 53.7 | 5423075 | Planctomyces<br>limnophilus DSM 3776<br>plasmid pPLIM01 | 57   | 37010  |
| Polaromonas<br>naphthalenivorans CJ2 | 62.5 | 4410291 | Polaromonas<br>naphthalenivorans CJ2<br>plasmid pPNAP01 | 57.5 | 353291 |
| Polaromonas<br>naphthalenivorans CJ2 | 62.5 | 4410291 | Polaromonas<br>naphthalenivorans CJ2<br>plasmid pPNAP02 | 58   | 190172 |
| Polaromonas<br>naphthalenivorans CJ2 | 62.5 | 4410291 | Polaromonas<br>naphthalenivorans CJ2<br>plasmid pPNAP03 | 56.9 | 171866 |
| Polaromonas<br>naphthalenivorans CJ2 | 62.5 | 4410291 | Polaromonas<br>naphthalenivorans CJ2<br>plasmid pPNAP04 | 59   | 143747 |
| Polaromonas<br>naphthalenivorans CJ2 | 62.5 | 4410291 | Polaromonas<br>naphthalenivorans CJ2<br>plasmid pPNAP05 | 59.6 | 58808  |
| Polaromonas<br>naphthalenivorans CJ2 | 62.5 | 4410291 | Polaromonas<br>naphthalenivorans CJ2<br>plasmid pPNAP06 | 55.7 | 21611  |
| Polaromonas<br>naphthalenivorans CJ2 | 62.5 | 4410291 | Polaromonas<br>naphthalenivorans CJ2<br>plasmid pPNAP07 | 57.1 | 9898   |

|                                             |      |         |                                                           |      |        |
|---------------------------------------------|------|---------|-----------------------------------------------------------|------|--------|
| Polaromonas naphthalenivorans CJ2           | 62.5 | 4410291 | Polaromonas naphthalenivorans CJ2 plasmid pPNAP08         | 52.1 | 6459   |
| Polaromonas sp. JS666                       | 62.5 | 5200264 | Polaromonas sp. JS666 plasmid 1                           | 56.9 | 360405 |
| Polaromonas sp. JS666                       | 62.5 | 5200264 | Polaromonas sp. JS666 plasmid 2                           | 59.7 | 338007 |
| Polymorphum gilvum SL003B-26A1              | 67.2 | 4649365 | Polymorphum gilvum SL003B-26A1 plasmid pSL003B            | 61.6 | 69598  |
| Prosthecochloris aestuarii DSM 271          | 50.1 | 2512923 | Prosthecochloris aestuarii DSM 271 plasmid pPAES01        | 50.5 | 66772  |
| Proteus mirabilis HI4320                    | 38.9 | 4063606 | Proteus mirabilis plasmid pHI4320                         | 36.2 | 36289  |
| Pseudomonas fluorescens SBW25               | 60.5 | 6722539 | Pseudomonas fluorescens SBW25                             | 53.2 | 425094 |
| Pseudomonas syringae pv. phaseolicola 1448A | 58   | 5928787 | Pseudomonas syringae pv. phaseolicola 1448A large plasmid | 54.1 | 131950 |
| Pseudomonas syringae pv. phaseolicola 1448A | 58   | 5928787 | Pseudomonas syringae pv. phaseolicola 1448A small plasmid | 56   | 51711  |
| Pseudonocardia dioxanivorans CB1190         | 73.3 | 7096571 | Pseudonocardia dioxanivorans CB1190 plasmid pPSED01       | 70.7 | 192355 |
| Pseudonocardia dioxanivorans CB1190         | 73.3 | 7096571 | Pseudonocardia dioxanivorans CB1190 plasmid pPSED03       | 61.8 | 15063  |
| Psychrobacter cryohalolentis K5             | 42.3 | 3059876 | Psychrobacter cryohalolentis K5 plasmid 1                 | 38.3 | 41221  |
| Psychrobacter sp. PRwf-1                    | 44.9 | 2978976 | Psychrobacter sp. PRwf-1 plasmid pRWF101                  | 38.3 | 13956  |

|                                           |      |         |                                          |      |        |
|-------------------------------------------|------|---------|------------------------------------------|------|--------|
| Psychrobacter sp. PRwf-1                  | 44.9 | 2978976 | Psychrobacter sp. PRwf-1 plasmid pRWF102 | 40.4 | 2117   |
| Pusillimonas sp. T7-7                     | 56.9 | 3883605 | Pusillimonas sp. T7-7 plasmid unnamed    | 56   | 41205  |
| Rahnella sp. Y9602                        | 52.3 | 4864217 | Rahnella sp. Y9602 plasmid pRAHAQ01      | 52.1 | 616549 |
| Rahnella sp. Y9602                        | 52.3 | 4864217 | Rahnella sp. Y9602 plasmid pRAHAQ02      | 48.3 | 133486 |
| Ralstonia eutropha JMP134                 | 64.7 | 3806533 | Ralstonia eutropha JMP134 megaplasmid    | 60.6 | 634917 |
| Ralstonia eutropha JMP134                 | 64.7 | 3806533 | Ralstonia eutropha JMP134 plasmid 1      | 64.7 | 87688  |
| Ralstonia eutropha JMP134 chromosome 2    | 65   | 2726152 | Ralstonia eutropha JMP134 megaplasmid    | 60.6 | 634917 |
| Ralstonia eutropha JMP134 chromosome 2    | 65   | 2726152 | Ralstonia eutropha JMP134 plasmid 1      | 64.7 | 87688  |
| Ralstonia metallidurans CH34 chromosome 1 | 63.8 | 3928089 | Ralstonia metallidurans CH34 plasmid 1   | 60.1 | 233720 |
| Ralstonia metallidurans CH34 chromosome 1 | 63.8 | 3928089 | Ralstonia metallidurans CH34 plasmid 2   | 60.5 | 171459 |
| Ralstonia metallidurans CH34 chromosome 2 | 63.6 | 2580084 | Ralstonia metallidurans CH34 plasmid 1   | 60.1 | 233720 |
| Ralstonia metallidurans CH34 chromosome 2 | 63.6 | 2580084 | Ralstonia metallidurans CH34 plasmid 2   | 60.5 | 171459 |
| Ralstonia pickettii 12D                   | 63.6 | 3647724 | Ralstonia pickettii 12D plasmid pRp12D01 | 58.4 | 389779 |
| Ralstonia pickettii 12D                   | 63.6 | 3647724 | Ralstonia pickettii 12D plasmid pRp12D02 | 61.6 | 273136 |
| Ralstonia pickettii 12D                   | 63.6 | 3647724 | Ralstonia pickettii 12D plasmid pRp12D03 | 61.2 | 51398  |
| Ralstonia pickettii 12D chromosome 2      | 64.5 | 1323321 | Ralstonia pickettii 12D plasmid pRp12D01 | 58.4 | 389779 |
| Ralstonia pickettii 12D chromosome 2      | 64.5 | 1323321 | Ralstonia pickettii 12D plasmid pRp12D02 | 61.6 | 273136 |

|                                                    |      |         |                                                    |      |         |
|----------------------------------------------------|------|---------|----------------------------------------------------|------|---------|
| Ralstonia pickettii 12D<br>chromosome 2            | 64.5 | 1323321 | Ralstonia pickettii 12D<br>plasmid pRp12D03        | 61.2 | 51398   |
| Ralstonia pickettii 12J                            | 63.4 | 3942557 | Ralstonia pickettii 12J<br>plasmid pRPIC01         | 60.4 | 80934   |
| Ralstonia pickettii 12J<br>chromosome 2            | 64.5 | 1302238 | Ralstonia pickettii 12J<br>plasmid pRPIC01         | 60.4 | 80934   |
| Rhizobium etli CFN 42                              | 61.3 | 4381608 | Rhizobium etli CFN 42<br>plasmid p42a              | 58   | 194229  |
| Rhizobium etli CFN 42                              | 61.3 | 4381608 | Rhizobium etli CFN 42<br>plasmid p42b              | 61.8 | 184338  |
| Rhizobium etli CFN 42                              | 61.3 | 4381608 | Rhizobium etli CFN 42<br>plasmid p42c              | 61.5 | 250948  |
| Rhizobium etli CFN 42                              | 61.3 | 4381608 | Rhizobium etli CFN 42<br>plasmid p42e              | 61.7 | 505334  |
| Rhizobium etli CFN 42                              | 61.3 | 4381608 | Rhizobium etli CFN 42<br>plasmid p42f              | 61.2 | 642517  |
| Rhizobium etli CIAT<br>652                         | 61.7 | 4513324 | Rhizobium etli CIAT<br>652 plasmid pB              | 57.8 | 429111  |
| Rhizobium etli CIAT<br>652                         | 61.7 | 4513324 | Rhizobium etli CIAT<br>652 plasmid pC              | 60.9 | 1091523 |
| Rhizobium etli CIAT<br>652                         | 61.7 | 4513324 | Rhizobium etli CIAT<br>652 plasmid pA              | 62.2 | 414090  |
| Rhizobium<br>leguminosarum bv.<br>trifolii WSM1325 | 61.1 | 4767043 | Rhizobium<br>leguminosarum bv.<br>trifolii WSM1325 | 60.4 | 828924  |
| Rhizobium<br>leguminosarum bv.<br>trifolii WSM1325 | 61.1 | 4767043 | Rhizobium<br>leguminosarum bv.<br>trifolii WSM1325 | 60.8 | 660973  |
| Rhizobium<br>leguminosarum bv.<br>trifolii WSM1325 | 61.1 | 4767043 | Rhizobium<br>leguminosarum bv.<br>trifolii WSM1325 | 58.8 | 516088  |
| Rhizobium<br>leguminosarum bv.<br>trifolii WSM1325 | 61.1 | 4767043 | Rhizobium<br>leguminosarum bv.<br>trifolii WSM1325 | 60.6 | 350312  |

|                                                    |      |         |                                                       |      |         |
|----------------------------------------------------|------|---------|-------------------------------------------------------|------|---------|
| Rhizobium<br>leguminosarum bv.<br>trifolii WSM1325 | 61.1 | 4767043 | Rhizobium<br>leguminosarum bv.<br>trifolii WSM1325    | 60.4 | 294782  |
| Rhizobium<br>leguminosarum bv.<br>trifolii WSM2304 | 61.5 | 4537948 | Rhizobium<br>leguminosarum bv.<br>trifolii WSM2304    | 60.4 | 1266105 |
| Rhizobium<br>leguminosarum bv.<br>trifolii WSM2304 | 61.5 | 4537948 | Rhizobium<br>leguminosarum bv.<br>trifolii WSM2304    | 62   | 501946  |
| Rhizobium<br>leguminosarum bv.<br>trifolii WSM2304 | 61.5 | 4537948 | Rhizobium<br>leguminosarum bv.<br>trifolii WSM2304    | 57.9 | 308747  |
| Rhizobium<br>leguminosarum bv.<br>trifolii WSM2304 | 61.5 | 4537948 | Rhizobium<br>leguminosarum bv.<br>trifolii WSM2304    | 61.4 | 257956  |
| Rhizobium<br>leguminosarum bv.<br>viciae 3841      | 61.1 | 5057142 | Rhizobium<br>leguminosarum bv.<br>viciae 3841 plasmid | 58.7 | 147463  |
| Rhizobium<br>leguminosarum bv.<br>viciae 3841      | 61.1 | 5057142 | Rhizobium<br>leguminosarum bv.<br>viciae 3841 plasmid | 61   | 352782  |
| Rhizobium<br>leguminosarum bv.<br>viciae 3841      | 61.1 | 5057142 | Rhizobium<br>leguminosarum bv.<br>viciae 3841 plasmid | 59.6 | 488135  |
| Rhizobium<br>leguminosarum bv.<br>viciae 3841      | 61.1 | 5057142 | Rhizobium<br>leguminosarum bv.<br>viciae 3841 plasmid | 61   | 684202  |
| Rhizobium sp. NGR234                               | 63   | 3925702 | Rhizobium sp. NGR234<br>plasmid pNGR234a              | 58.5 | 536165  |
| Rhizobium sp. NGR234                               | 63   | 3925702 | Rhizobium sp. NGR234<br>plasmid pNGR234b              | 62.3 | 2430033 |
| Rhodobacter capsulatus<br>SB1003                   | 66.6 | 3738958 | Rhodobacter capsulatus<br>SB1003 plasmid              | 66.5 | 132962  |
| Rhodobacter<br>sphaeroides 2.4.1                   | 69   | 3188609 | Rhodobacter<br>sphaeroides 2.4.1                      | 70.1 | 114178  |

|                                                       |      |         |                                                       |      |        |
|-------------------------------------------------------|------|---------|-------------------------------------------------------|------|--------|
| Rhodobacter<br>sphaeroides 2.4.1                      | 69   | 3188609 | Rhodobacter<br>sphaeroides 2.4.1                      | 63.8 | 105284 |
| Rhodobacter<br>sphaeroides 2.4.1                      | 69   | 3188609 | Rhodobacter<br>sphaeroides 2.4.1                      | 63.8 | 100828 |
| Rhodobacter<br>sphaeroides 2.4.1                      | 69   | 943016  | Rhodobacter<br>sphaeroides 2.4.1                      | 70.1 | 114178 |
| Rhodobacter<br>sphaeroides 2.4.1                      | 69   | 943016  | Rhodobacter<br>sphaeroides 2.4.1                      | 63.8 | 105284 |
| Rhodobacter<br>sphaeroides 2.4.1                      | 69   | 943016  | Rhodobacter<br>sphaeroides 2.4.1                      | 63.8 | 100828 |
| Rhodobacter<br>sphaeroides ATCC<br>17025              | 68.5 | 3217726 | Rhodobacter<br>sphaeroides ATCC<br>17025 plasmid      | 67.7 | 877879 |
| Rhodobacter<br>sphaeroides ATCC<br>17025              | 68.5 | 3217726 | Rhodobacter<br>sphaeroides ATCC<br>17025 plasmid      | 67.6 | 289489 |
| Rhodobacter<br>sphaeroides ATCC<br>17025              | 68.5 | 3217726 | Rhodobacter<br>sphaeroides ATCC<br>17025 plasmid      | 69.4 | 121962 |
| Rhodobacter<br>sphaeroides ATCC<br>17025              | 68.5 | 3217726 | Rhodobacter<br>sphaeroides ATCC<br>17025 plasmid      | 64   | 36198  |
| Rhodobacter<br>sphaeroides ATCC<br>17025              | 68.5 | 3217726 | Rhodobacter<br>sphaeroides ATCC<br>17025 plasmid      | 58.9 | 13873  |
| Rhodobacter<br>sphaeroides ATCC<br>17029              | 69.1 | 3147721 | Rhodobacter<br>sphaeroides ATCC<br>17029 plasmid      | 69.6 | 122606 |
| Rhodobacter<br>sphaeroides ATCC<br>17029 chromosome 2 | 68.6 | 1219053 | Rhodobacter<br>sphaeroides ATCC<br>17029 plasmid      | 69.6 | 122606 |
| Rhodobacter<br>sphaeroides KD131                      | 69.2 | 3152792 | Rhodobacter<br>sphaeroides KD131<br>plasmid pRSKD131A | 70.1 | 157345 |

|                                                  |      |         |                                                        |      |         |
|--------------------------------------------------|------|---------|--------------------------------------------------------|------|---------|
| Rhodobacter<br>sphaeroides KD131                 | 69.2 | 3152792 | Rhodobacter<br>sphaeroides KD131<br>plasmid pRSKD131B  | 69.8 | 103355  |
| Rhodobacter<br>sphaeroides KD131<br>chromosome 2 | 68.7 | 1297647 | Rhodobacter<br>sphaeroides KD131<br>plasmid pRSKD131A  | 70.1 | 157345  |
| Rhodobacter<br>sphaeroides KD131<br>chromosome 2 | 68.7 | 1297647 | Rhodobacter<br>sphaeroides KD131<br>plasmid pRSKD131B  | 69.8 | 103355  |
| Rhodococcus<br>erythropolis PR4                  | 62.3 | 6516310 | Rhodococcus<br>erythropolis PR4                        | 61.9 | 271577  |
| Rhodococcus<br>erythropolis PR4                  | 62.3 | 6516310 | Rhodococcus<br>erythropolis PR4                        | 63   | 104014  |
| Rhodococcus<br>erythropolis PR4                  | 62.3 | 6516310 | Rhodococcus<br>erythropolis PR4                        | 62.2 | 3637    |
| Rhodococcus jostii<br>RHA1                       | 67.5 | 7804765 | Rhodococcus jostii<br>RHA1 plasmid pRHL1               | 65.1 | 1123075 |
| Rhodococcus jostii<br>RHA1                       | 67.5 | 7804765 | Rhodococcus jostii<br>RHA1 plasmid pRHL2               | 64   | 442536  |
| Rhodococcus jostii<br>RHA1                       | 67.5 | 7804765 | Rhodococcus jostii<br>RHA1 plasmid pRHL3               | 64.9 | 332361  |
| Rhodoferax<br>ferrireducens T118                 | 59.9 | 4712337 | Rhodoferax<br>ferrireducens T118                       | 54.4 | 257447  |
| Rhodospirillum rubrum<br>ATCC11170               | 65.4 | 4352825 | Rhodospirillum rubrum<br>ATCC 11170 plasmid<br>unnamed | 59.8 | 53732   |
| Rhodothermus marinus<br>DSM 4252                 | 64.5 | 3261604 | Rhodothermus marinus<br>DSM 4252 plasmid<br>pRMAR01    | 58.2 | 125133  |
| Rickettsia africae ESF-5                         | 32.4 | 1278540 | Rickettsia africae ESF-5<br>plasmid pRAF               | 33.5 | 12377   |
| Rickettsia felis<br>URRWXCal2                    | 32.5 | 1485148 | Rickettsia felis<br>URRWXCal2 plasmid                  | 33.6 | 62829   |

|                                                                                |      |         |                                                                                       |      |        |
|--------------------------------------------------------------------------------|------|---------|---------------------------------------------------------------------------------------|------|--------|
| Rickettsia felis<br>URRWXCal2                                                  | 32.5 | 1485148 | Rickettsia felis<br>URRWXCal2 plasmid                                                 | 33.2 | 39263  |
| Rickettsia massiliae<br>MTU5                                                   | 32.5 | 1360898 | pRFdelta<br>Rickettsia massiliae<br>MTU5 plasmid pRMA                                 | 31.7 | 15286  |
| Rickettsia peacockii str.<br>Rustic                                            | 32.6 | 1288492 | Rickettsia peacockii str.<br>Rustic plasmid pRPR                                      | 34.7 | 26406  |
| Ruegeria pomeroyi<br>DSS-3                                                     | 64.2 | 4109442 | Ruegeria pomeroyi<br>DSS-3 megaplasmid                                                | 62.8 | 491611 |
| Ruminococcus albus 7                                                           | 44.2 | 3685408 | Ruminococcus albus 7<br>plasmid pRUMAL01                                              | 38.1 | 420706 |
| Ruminococcus albus 7                                                           | 44.2 | 3685408 | Ruminococcus albus 7<br>plasmid pRUMAL02                                              | 44.4 | 352646 |
| Ruminococcus albus 7                                                           | 44.2 | 3685408 | Ruminococcus albus 7<br>plasmid pRUMAL03                                              | 36.7 | 15907  |
| Ruminococcus albus 7                                                           | 44.2 | 3685408 | Ruminococcus albus 7<br>plasmid pRUMAL04                                              | 42.8 | 7420   |
| Salinibacter ruber DSM<br>13855                                                | 66.2 | 3551823 | Salinibacter ruber DSM<br>13855 plasmid pSR35                                         | 57.9 | 35505  |
| Salmonella enterica<br>subsp. enterica serovar<br>Agona str. SL483             | 52.1 | 4798660 | Salmonella enterica<br>subsp. enterica serovar<br>Agona str. SL483<br>plasmid unnamed | 40.7 | 37978  |
| Salmonella enterica<br>subsp. enterica serovar<br>Choleraesuis str. SC-<br>B67 | 52.2 | 4755700 | Salmonella enterica<br>subsp. enterica serovar<br>Choleraesuis plasmid<br>pSCV50      | 52.1 | 49558  |
| Salmonella enterica<br>subsp. enterica serovar<br>Choleraesuis str. SC-<br>B67 | 52.2 | 4755700 | Salmonella enterica<br>subsp. enterica serovar<br>Choleraesuis plasmid<br>pSC138      | 51.3 | 138742 |
| Salmonella enterica<br>subsp. enterica serovar<br>Dublin str.<br>CT 02021853   | 52.2 | 4842908 | Salmonella enterica<br>subsp. enterica serovar<br>Dublin str.<br>CT 02021853 plasmid  | 48.6 | 74551  |



|                                                                                   |      |         |                                                                                                            |      |        |
|-----------------------------------------------------------------------------------|------|---------|------------------------------------------------------------------------------------------------------------|------|--------|
| Salmonella enterica<br>subsp. enterica serovar<br>Heidelberg str. SL476           | 52.1 | 4888768 | Salmonella enterica<br>subsp. enterica serovar<br>Heidelberg str. SL476<br>plasmid pSL476 91               | 50.3 | 91374  |
| Salmonella enterica<br>subsp. enterica serovar<br>Heidelberg str. SL476           | 52.1 | 4888768 | Salmonella enterica<br>subsp. enterica serovar<br>Heidelberg str. SL476<br>plasmid pSL476 3                | 55.1 | 3373   |
| Salmonella enterica<br>subsp. enterica serovar<br>Newport str. SL254              | 52.2 | 4827641 | Salmonella enterica<br>enterica sv Newport str.<br>SL254 plasmid                                           | 52.8 | 176473 |
| Salmonella enterica<br>subsp. enterica serovar<br>Newport str. SL254              | 52.2 | 4827641 | Salmonella enterica<br>subsp. enterica serovar<br>Newport str. SL254<br>plasmid pSL254 3                   | 43   | 3605   |
| Salmonella enterica<br>subsp. enterica serovar<br>Paratyphi C strain<br>RKS4594   | 52.2 | 4833080 | Salmonella enterica<br>subsp. enterica serovar<br>Paratyphi C strain<br>RKS4594 plasmid                    | 52.8 | 55414  |
| Salmonella enterica<br>subsp. enterica serovar<br>Schwarzengrund str.<br>CVM19633 | 52.2 | 4709075 | Salmonella enterica<br>subsp. enterica serovar<br>Schwarzengrund str.<br>CVM19633 plasmid<br>pCVM19633 110 | 54   | 110227 |
| Salmonella enterica<br>subsp. enterica serovar<br>Schwarzengrund str.<br>CVM19633 | 52.2 | 4709075 | Salmonella enterica<br>subsp. enterica serovar<br>Schwarzengrund str.<br>CVM19633 plasmid<br>pCVM19633 4   | 47.5 | 4585   |
| Salmonella enterica<br>subsp. enterica serovar<br>Typhi                           | 52.1 | 4809037 | Salmonella enterica<br>subsp. enterica serovar<br>Typhi plasmid pHCM1                                      | 47.6 | 218160 |
| Salmonella enterica<br>subsp. enterica serovar<br>Typhi                           | 52.1 | 4809037 | Salmonella enterica<br>subsp. enterica serovar<br>Typhi plasmid pHCM2                                      | 50.6 | 106516 |

|                                                                   |      |         |                                                                                   |      |        |
|-------------------------------------------------------------------|------|---------|-----------------------------------------------------------------------------------|------|--------|
| Salmonella enterica<br>subsp. enterica serovar<br>Typhimurium LT2 | 52.2 | 4857432 | Salmonella enterica<br>subsp. enterica serovar<br>Typhimurium LT2<br>plasmid pSLT | 53.1 | 93939  |
| Sebaldella termitidis<br>ATCC 33386                               | 33.5 | 4418842 | Sebaldella termitidis<br>ATCC 33386 plasmid<br>pSTERM01                           | 28.2 | 54160  |
| Sebaldella termitidis<br>ATCC 33386                               | 33.5 | 4418842 | Sebaldella termitidis<br>ATCC 33386 plasmid<br>pSTERMP2                           | 29.4 | 13648  |
| Serratia proteamaculans<br>568                                    | 55.1 | 5448853 | Serratia proteamaculans<br>568 plasmid pSPRO01                                    | 49.2 | 46804  |
| Shewanella baltica<br>OS155                                       | 46.3 | 5127376 | Shewanella baltica<br>OS155 plasmid pSbal01                                       | 46.7 | 116763 |
| Shewanella baltica<br>OS155                                       | 46.3 | 5127376 | Shewanella baltica<br>OS155 plasmid pSbal02                                       | 42.4 | 74000  |
| Shewanella baltica<br>OS155                                       | 46.3 | 5127376 | Shewanella baltica<br>OS155 plasmid pSbal03                                       | 46.1 | 16762  |
| Shewanella baltica<br>OS155                                       | 46.3 | 5127376 | Shewanella baltica<br>OS155 plasmid pSbal04                                       | 40.3 | 7995   |
| Shewanella baltica<br>OS185                                       | 46.3 | 5229686 | Shewanella baltica<br>OS185 plasmid                                               | 43.7 | 83224  |
| Shewanella baltica<br>OS195                                       | 46.3 | 5347283 | Shewanella baltica<br>OS195 plasmid                                               | 42.7 | 75605  |
| Shewanella baltica<br>OS195                                       | 46.3 | 5347283 | Shewanella baltica<br>OS195 plasmid                                               | 44.1 | 75508  |
| Shewanella baltica<br>OS195                                       | 46.3 | 5347283 | Shewanella baltica<br>OS195 plasmid                                               | 42.9 | 49148  |
| Shewanella baltica<br>OS223                                       | 46.3 | 5145902 | Shewanella baltica<br>OS223 plasmid                                               | 44.4 | 88311  |
| Shewanella baltica<br>OS223                                       | 46.3 | 5145902 | Shewanella baltica<br>OS223 plasmid                                               | 46.7 | 59223  |
| Shewanella baltica<br>OS223                                       | 46.3 | 5145902 | Shewanella baltica<br>OS223 plasmid                                               | 44.6 | 65448  |

|                              |      |         |                                              |      |         |
|------------------------------|------|---------|----------------------------------------------|------|---------|
| Shewanella oneidensis MR-1   | 46   | 4969803 | Shewanella oneidensis MR-1 megaplasmid       | 43.7 | 161613  |
| Shewanella sp. ANA-3         | 48.1 | 4972204 | Shewanella sp. ANA-3 plasmid 1               | 45.7 | 278942  |
| Shewanella sp. MR-7          | 47.9 | 4792610 | Shewanella sp. MR-7 plasmid1                 | 43.1 | 6499    |
| Shigella boydii CDC 3083-94  | 51.3 | 4615997 | Shigella boydii CDC 3083-94 plasmid          | 47.2 | 2089    |
| Shigella boydii CDC 3083-94  | 51.3 | 4615997 | Shigella boydii CDC 3083-94 plasmid          | 41.4 | 33103   |
| Shigella boydii CDC 3083-94  | 51.3 | 4615997 | Shigella boydii CDC 3083-94 plasmid          | 46.4 | 5114    |
| Shigella boydii CDC 3083-94  | 51.3 | 4615997 | Shigella boydii CDC 3083-94 plasmid          | 46.1 | 210919  |
| Shigella boydii CDC 3083-94  | 51.3 | 4615997 | Shigella boydii CDC 3083-94 plasmid          | 49.1 | 7437    |
| Shigella boydii Sb227        | 51.2 | 4519823 | Shigella boydii Sb227 plasmid pSB4 227       | 47.4 | 126697  |
| Shigella dysenteriae Sd197   | 51.2 | 4369232 | Shigella dysenteriae Sd197 plasmid           | 44.8 | 182726  |
| Shigella dysenteriae Sd197   | 51.2 | 4369232 | Shigella dysenteriae Sd197 plasmid           | 39.7 | 8953    |
| Shigella flexneri 2a str 301 | 50.9 | 4607203 | Shigella flexneri 2a str. 301 plasmid pCP301 | 45.8 | 221618  |
| Shigella sonnei Ss046        | 51   | 4825265 | Shigella sonnei Ss046 plasmid pSS            | 45.3 | 214396  |
| Silicibacter sp. TM1040      | 60.4 | 3200938 | Silicibacter sp. TM1040 mega plasmid         | 59.4 | 821788  |
| Silicibacter sp. TM1040      | 60.4 | 3200938 | Silicibacter sp. TM1040 plasmid unnamed      | 55.7 | 130973  |
| Sinorhizobium medicae WSM419 | 61.5 | 3781904 | Sinorhizobium medicae WSM419 plasmid pSMED01 | 61.5 | 1570951 |

|                                                   |      |         |                                                       |      |         |
|---------------------------------------------------|------|---------|-------------------------------------------------------|------|---------|
| Sinorhizobium medicae<br>WSM419                   | 61.5 | 3781904 | Sinorhizobium medicae<br>WSM419 plasmid               | 59.9 | 1245408 |
| Sinorhizobium medicae<br>WSM419                   | 61.5 | 3781904 | pSMED02<br>Sinorhizobium medicae<br>WSM419 plasmid    | 60.1 | 219313  |
| Sinorhizobium meliloti<br>1021                    | 62.7 | 3654135 | pSMED03<br>Sinorhizobium meliloti<br>plasmid pSymA    | 60.4 | 1354226 |
| Sinorhizobium meliloti<br>1021                    | 62.7 | 3654135 | Sinorhizobium meliloti<br>plasmid pSymB               | 62.4 | 1683333 |
| Sinorhizobium meliloti<br>AK83                    | 62.7 | 3820344 | Sinorhizobium meliloti<br>AK83 plasmid                | 58.9 | 256269  |
| Sinorhizobium meliloti<br>AK83                    | 62.7 | 3820344 | Sinorhizobium meliloti<br>AK83 plasmid                | 57.9 | 70499   |
| Sinorhizobium meliloti<br>AK83 chromosome 2       | 62.4 | 1680879 | Sinorhizobium meliloti<br>AK83 plasmid                | 58.9 | 256269  |
| Sinorhizobium meliloti<br>AK83 chromosome 2       | 62.4 | 1680879 | Sinorhizobium meliloti<br>AK83 plasmid                | 57.9 | 70499   |
| Sinorhizobium meliloti<br>AK83 chromosome 3       | 60   | 1312480 | Sinorhizobium meliloti<br>AK83 plasmid                | 58.9 | 256269  |
| Sinorhizobium meliloti<br>AK83 chromosome 3       | 60   | 1312480 | Sinorhizobium meliloti<br>AK83 plasmid                | 57.9 | 70499   |
| Sodalis glossinidius str.<br>morsitans            | 54.7 | 4171146 | Sodalis glossinidius str.<br>morsitans plasmid pSG1   | 48.9 | 83306   |
| Sodalis glossinidius str.<br>morsitans            | 54.7 | 4171146 | Sodalis glossinidius str.<br>morsitans plasmid pSG2   | 44.7 | 27240   |
| Sodalis glossinidius str.<br>morsitans            | 54.7 | 4171146 | Sodalis glossinidius str.<br>'morsitans' plasmid      | 47.8 | 10810   |
| Sphingobium<br>chlorophenicum L-1                 | 63.9 | 3080818 | Sphingobium<br>chlorophenicum L-1<br>plasmid pSPHCH01 | 64.8 | 123733  |
| Sphingobium<br>chlorophenicum L-1<br>chromosome 2 | 63.6 | 1368670 | Sphingobium<br>chlorophenicum L-1<br>plasmid pSPHCH01 | 64.8 | 123733  |

|                                             |      |         |                                               |      |        |
|---------------------------------------------|------|---------|-----------------------------------------------|------|--------|
| Sphingobium japonicum<br>UT26S              | 64.8 | 3514822 | Sphingobium japonicum<br>UT26S plasmid pUT1   | 63.7 | 31776  |
| Sphingobium japonicum<br>UT26S              | 64.8 | 3514822 | Sphingobium japonicum<br>UT26S plasmid pCHQ1  | 63   | 190974 |
| Sphingobium japonicum<br>UT26S              | 64.8 | 3514822 | Sphingobium japonicum<br>UT26S plasmid pUT2   | 61   | 5398   |
| Sphingobium japonicum<br>UT26S chromosome 2 | 65.9 | 681892  | Sphingobium japonicum<br>UT26S plasmid pUT1   | 63.7 | 31776  |
| Sphingobium japonicum<br>UT26S chromosome 2 | 65.9 | 681892  | Sphingobium japonicum<br>UT26S plasmid pCHQ1  | 63   | 190974 |
| Sphingobium japonicum<br>UT26S chromosome 2 | 65.9 | 681892  | Sphingobium japonicum<br>UT26S plasmid pUT2   | 61   | 5398   |
| Sphingomonas wittichii<br>RW1               | 68.4 | 5382261 | Sphingomonas wittichii<br>RW1 plasmid pSWIT01 | 64.1 | 310228 |
| Sphingomonas wittichii<br>RW1               | 68.4 | 5382261 | Sphingomonas wittichii<br>RW1 plasmid pSWIT02 | 61.2 | 222757 |
| Sphingopyxis alaskensis<br>RB2256           | 65.5 | 3345170 | Sphingopyxis alaskensis<br>RB2256 F plasmid   | 60.4 | 28543  |
| Spirosoma linguale<br>DSM 74                | 50.2 | 8078757 | Spirosoma linguale<br>DSM 74 plasmid          | 49.2 | 189452 |
| Spirosoma linguale<br>DSM 74                | 50.2 | 8078757 | Spirosoma linguale<br>DSM 74 plasmid          | 51.3 | 146936 |
| Spirosoma linguale<br>DSM 74                | 50.2 | 8078757 | Spirosoma linguale<br>DSM 74 plasmid          | 44.3 | 36434  |
| Spirosoma linguale<br>DSM 74                | 50.2 | 8078757 | Spirosoma linguale<br>DSM 74 plasmid          | 47.8 | 9965   |
| Spirosoma linguale<br>DSM 74                | 50.2 | 8078757 | Spirosoma linguale<br>DSM 74 plasmid          | 44.2 | 8651   |
| Spirosoma linguale<br>DSM 74                | 50.2 | 8078757 | Spirosoma linguale<br>DSM 74 plasmid          | 47.3 | 7683   |
| Spirosoma linguale<br>DSM 74                | 50.2 | 8078757 | Spirosoma linguale<br>DSM 74 plasmid          | 47.6 | 7308   |
| Spirosoma linguale<br>DSM 74                | 50.2 | 8078757 | Spirosoma linguale<br>DSM 74 plasmid          | 48.4 | 6072   |

|                                                    |      |         |                                                    |      |       |
|----------------------------------------------------|------|---------|----------------------------------------------------|------|-------|
| Staphylococcus aureus strain Mu50                  | 32.9 | 2878529 | Staphylococcus aureus subsp. aureus Mu50           | 28.9 | 25107 |
|                                                    |      |         | plasmid VRSAp                                      |      |       |
| Staphylococcus aureus subsp. aureus COL            | 32.8 | 2809422 | Staphylococcus aureus subsp. aureus COL            | 30   | 4440  |
|                                                    |      |         | plasmid pT181                                      |      |       |
| Staphylococcus aureus subsp. aureus ED98           | 32.8 | 2824404 | Staphylococcus aureus subsp. aureus ED98           | 35.6 | 1442  |
|                                                    |      |         | plasmid pAVY                                       |      |       |
| Staphylococcus aureus subsp. aureus ED98           | 32.8 | 2824404 | Staphylococcus aureus subsp. aureus ED98           | 30.1 | 4440  |
|                                                    |      |         | plasmid pT181                                      |      |       |
| Staphylococcus aureus subsp. aureus ED98           | 32.8 | 2824404 | Staphylococcus aureus subsp. aureus ED98           | 29   | 17256 |
|                                                    |      |         | plasmid pAVX                                       |      |       |
| Staphylococcus aureus subsp. aureus JH1            | 33   | 2906507 | Staphylococcus aureus subsp. aureus JH1            | 29.6 | 30429 |
|                                                    |      |         | plasmid pSJH101                                    |      |       |
| Staphylococcus aureus subsp. aureus JH9            | 32.9 | 2906700 | Staphylococcus aureus subsp. aureus JH9            | 29.6 | 30429 |
|                                                    |      |         | plasmid pSJH901                                    |      |       |
| Staphylococcus aureus subsp. aureus N315           | 32.8 | 2814816 | Staphylococcus aureus subsp. aureus N315           | 28.7 | 24653 |
|                                                    |      |         | plasmid pN315                                      |      |       |
| Staphylococcus aureus subsp. aureus USA300_FPR3757 | 32.8 | 2872769 | Staphylococcus aureus subsp. aureus USA300_FPR3757 | 28.7 | 3125  |
|                                                    |      |         | plasmid pUSA01                                     |      |       |
| Staphylococcus aureus subsp. aureus USA300_FPR3757 | 32.8 | 2872769 | Staphylococcus aureus subsp. aureus USA300_FPR3757 | 30   | 4439  |
|                                                    |      |         | plasmid pUSA02                                     |      |       |

|                                                           |      |         |                                                                                     |      |       |
|-----------------------------------------------------------|------|---------|-------------------------------------------------------------------------------------|------|-------|
| Staphylococcus aureus<br>subsp. aureus<br>USA300_FPR3757  | 32.8 | 2872769 | Staphylococcus aureus<br>subsp. aureus USA300<br>plasmid<br>USA300_FPR3757          | 28.7 | 37136 |
| Staphylococcus aureus<br>subsp. aureus<br>USA300_TCH1516  | 32.8 | 2872915 | Staphylococcus aureus<br>subsp. aureus<br>USA300_TCH1516<br>plasmid<br>pUSA300HOUMR | 30.5 | 27041 |
| Staphylococcus<br>epidermidis RP62A                       | 32.2 | 2616530 | Staphylococcus<br>epidermidis RP62A<br>plasmid pSERP                                | 31.9 | 27310 |
| Staphylococcus<br>saprophyticus subsp.<br>saprophyticus   | 33.2 | 2516575 | Staphylococcus<br>saprophyticus subsp.<br>saprophyticus plasmid<br>pSSP1            | 30.8 | 38454 |
| Staphylococcus<br>saprophyticus subsp.<br>saprophyticus   | 33.2 | 2516575 | Staphylococcus<br>saprophyticus subsp.<br>saprophyticus plasmid<br>pSSP2            | 31.3 | 22870 |
| Streptobacillus<br>moniliformis DSM<br>12112              | 26.3 | 1662578 | Streptobacillus<br>moniliformis DSM<br>12112 plasmid                                | 20.9 | 10702 |
| Streptococcus<br>gallolyticus subsp.<br>gallolyticus ATCC | 37.6 | 2356444 | Streptococcus<br>gallolyticus subsp.<br>gallolyticus ATCC                           | 37.3 | 20765 |
| Streptococcus suis<br>BM407                               | 41.1 | 2146229 | Streptococcus suis<br>BM407 plasmid                                                 | 36.4 | 24579 |
| Streptococcus<br>thermophilus LMD-9                       | 39.1 | 1856368 | Streptococcus<br>thermophilus LMD-9<br>plasmid 1                                    | 37   | 4449  |
| Streptococcus<br>thermophilus LMD-9                       | 39.1 | 1856368 | Streptococcus<br>thermophilus LMD-9<br>plasmid 2                                    | 35.1 | 3361  |

|                                       |      |          |                                                          |      |        |
|---------------------------------------|------|----------|----------------------------------------------------------|------|--------|
| Streptomyces<br>avermitilis MA-4680   | 70.7 | 9025608  | Streptomyces<br>avermitilis MA-4680                      | 69.2 | 94287  |
| Streptomyces coelicolor<br>A3(2)      | 72.1 | 8667507  | Streptomyces coelicolor<br>A3(2) plasmid SCP1            | 69.1 | 356023 |
| Streptomyces coelicolor<br>A3(2)      | 72.1 | 8667507  | Streptomyces coelicolor<br>A3(2) plasmid SCP2            | 72.1 | 31317  |
| Streptosporangium<br>roseum DSM 43021 | 70.9 | 10341314 | Streptosporangium<br>roseum DSM 43021<br>plasmid pSROS01 | 69.6 | 28204  |
| Sulfuricurvum kujiense<br>DSM 16994   | 45   | 2574824  | Sulfuricurvum kujiense<br>DSM 16994 plasmid<br>pSULKU01  | 40.6 | 118585 |
| Sulfuricurvum kujiense<br>DSM 16994   | 45   | 2574824  | Sulfuricurvum kujiense<br>DSM 16994 plasmid<br>pSULKU02  | 40.3 | 71513  |
| Sulfuricurvum kujiense<br>DSM 16994   | 45   | 2574824  | Sulfuricurvum kujiense<br>DSM 16994 plasmid<br>pSULKU03  | 38.2 | 51014  |
| Sulfuricurvum kujiense<br>DSM 16994   | 45   | 2574824  | Sulfuricurvum kujiense<br>DSM 16994 plasmid<br>pSULKU04  | 43.1 | 3421   |
| Synechococcus<br>elongatus PCC 7942   | 55.5 | 2695903  | Synechococcus<br>elongatus PCC 7942                      | 52.9 | 46366  |
| Synechococcus sp. PCC<br>7002         | 49.6 | 3008047  | Synechococcus sp. PCC<br>7002 plasmid pAQ1               | 49   | 4809   |
| Synechococcus sp. PCC<br>7002         | 49.6 | 3008047  | Synechococcus sp. PCC<br>7002 plasmid pAQ3               | 45.9 | 16103  |
| Synechococcus sp. PCC<br>7002         | 49.6 | 3008047  | Synechococcus sp. PCC<br>7002 plasmid pAQ4               | 44.1 | 31972  |
| Synechococcus sp. PCC<br>7002         | 49.6 | 3008047  | Synechococcus sp. PCC<br>7002 plasmid pAQ5               | 42.6 | 38515  |
| Synechococcus sp. PCC<br>7002         | 49.6 | 3008047  | Synechococcus sp. PCC<br>7002 plasmid pAQ6               | 45.1 | 124030 |
| Synechococcus sp. PCC<br>7002         | 49.6 | 3008047  | Synechococcus sp. PCC<br>7002 plasmid pAQ7               | 47.3 | 186459 |



|                                            |      |         |                                                            |      |        |
|--------------------------------------------|------|---------|------------------------------------------------------------|------|--------|
| Thauera sp. MZ1T                           | 68.4 | 4496212 | Thauera sp. MZ1T<br>plasmid pTha01                         | 62.3 | 78374  |
| Thermomicrobium<br>roseum DSM 5159         | 63.6 | 2003006 | Thermomicrobium<br>roseum DSM 5159<br>plasmid unnamed      | 65.7 | 917738 |
| Thermovibrio<br>ammonificans HB-1          | 52.1 | 1682965 | Thermovibrio<br>ammonificans HB-1<br>plasmid pTHEAM01      | 52.5 | 76561  |
| Thermus scotoductus<br>SA-01               | 64.9 | 2346803 | Thermus scotoductus<br>SA-01 plasmid pTSC8                 | 65.9 | 8383   |
| Thermus thermophilus<br>HB27               | 69.4 | 1894877 | Thermus thermophilus<br>HB27 plasmid pTT27                 | 69.2 | 232605 |
| Thermus thermophilus<br>HB8                | 69.5 | 1849742 | Thermus thermophilus<br>HB8 plasmid pTT27                  | 69.4 | 256992 |
| Thermus thermophilus<br>HB8                | 69.5 | 1849742 | Thermus thermophilus<br>HB8 plasmid pTT8                   | 69   | 9322   |
| Thiomonas intermedia<br>K12                | 63.9 | 3396378 | Thiomonas intermedia<br>K12 plasmid pTINT01                | 61.5 | 45943  |
| Thiomonas intermedia<br>K12                | 63.9 | 3396378 | Thiomonas intermedia<br>K12 plasmid pTINT02                | 60.1 | 19774  |
| Treponema<br>succinifaciens DSM<br>2489    | 39.2 | 2731853 | Treponema<br>succinifaciens DSM<br>2489 plasmid            | 38.7 | 165572 |
| Tsukamurella<br>paurometabola DSM<br>20162 | 68.4 | 4379918 | Tsukamurella<br>paurometabola DSM<br>20162 plasmid pTpau01 | 67.8 | 99806  |
| Verminephrobacter<br>eiseniae EF01-2       | 65.3 | 5566749 | Verminephrobacter<br>eiseniae EF01-2 plasmid<br>pVEIS01    | 58.6 | 31194  |
| Verrucosispora maris<br>AB-18-032          | 70.9 | 6673976 | Verrucosispora maris<br>AB-18-032 plasmid                  | 70.3 | 58295  |
| Vibrio fischeri MJ11                       | 38.9 | 2905029 | Vibrio fischeri MJ11<br>plasmid pMJ100                     | 34.8 | 179459 |
| Vibrio fischeri MJ11<br>chromosome II      | 37.2 | 1418848 | Vibrio fischeri MJ11<br>plasmid pMJ100                     | 34.8 | 179459 |

|                                                   |      |         |                                                   |      |        |
|---------------------------------------------------|------|---------|---------------------------------------------------|------|--------|
| Vibrio harveyi ATCC BAA-1116                      | 45.5 | 3765351 | Vibrio harveyi ATCC BAA-1116 plasmid pVIBHAR      | 43.8 | 89008  |
| Vibrio harveyi ATCC BAA-1116 chromosome II        | 45.3 | 2204018 | Vibrio harveyi ATCC BAA-1116 plasmid pVIBHAR      | 43.8 | 89008  |
| Vibrio vulnificus YJ016                           | 46.4 | 3354505 | Vibrio vulnificus YJ016 plasmid pYJ016            | 44.9 | 48508  |
| Vibrio vulnificus YJ016 chromosome II             | 47.2 | 1857073 | Vibrio vulnificus YJ016 plasmid pYJ016            | 44.9 | 48508  |
| Waddlia chondrophila WSU 86-1044                  | 43.8 | 2116312 | Waddlia chondrophila WSU 86-1044 plasmid pWc      | 37.6 | 15593  |
| Xanthobacter autotrophicus Py2                    | 67.5 | 5308934 | Xanthobacter autotrophicus Py2 plasmid pXAUT01    | 65.3 | 316164 |
| Xanthomonas campestris pv. vesicatoria str. 85-10 | 64.7 | 5178466 | Xanthomonas campestris pv. vesicatoria str. 85-10 | 60.5 | 182572 |
| Xanthomonas campestris pv. vesicatoria str. 85-10 | 64.7 | 5178466 | Xanthomonas campestris pv. vesicatoria str. 85-10 | 60.7 | 38116  |
| Xanthomonas campestris pv. vesicatoria str. 85-10 | 64.7 | 5178466 | Xanthomonas campestris pv. vesicatoria str. 85-10 | 59.8 | 19146  |
| Xanthomonas campestris pv. vesicatoria str. 85-10 | 64.7 | 5178466 | Xanthomonas campestris pv. vesicatoria str. 85-10 | 56.6 | 1852   |
| Xenorhabdus nematophila ATCC 19061                | 44.2 | 4432590 | Xenorhabdus nematophila ATCC 19061 plasmid XNC1 p | 46   | 155327 |
| Xylanimonas cellulosilytica DSM 15894             | 72.5 | 3742776 | Xylanimonas cellulosilytica DSM 15894 plasmid     | 71   | 88604  |

|                                                            |      |         |                                                                                  |      |        |
|------------------------------------------------------------|------|---------|----------------------------------------------------------------------------------|------|--------|
| Xylella fastidiosa                                         | 51.8 | 2519802 | Xylella fastidiosa<br>Temecula1 plasmid<br>pXFPD1.3                              | 53.8 | 1346   |
| Xylella fastidiosa 9a5c                                    | 52.7 | 2679306 | Xylella fastidiosa<br>plasmid pXF51                                              | 49.6 | 51158  |
| Xylella fastidiosa 9a5c                                    | 52.7 | 2679306 | Xylella fastidiosa<br>plasmid pXF1.3                                             | 55.6 | 1286   |
| Xylella fastidiosa M23                                     | 51.8 | 2535690 | Xylella fastidiosa M23<br>plasmid pXFAS01                                        | 49.2 | 38297  |
| Yersinia enterocolitica<br>subsp. enterocolitica<br>8081   | 47.3 | 4615899 | Yersinia enterocolitica<br>subsp. enterocolitica<br>8081 plasmid                 | 43.9 | 67721  |
| Yersinia enterocolitica<br>subsp. palearctica<br>105.5R(r) | 47   | 4552107 | Yersinia enterocolitica<br>subsp. palearctica<br>105.5R(r) plasmid<br>105.5R(r)p | 44.2 | 69704  |
| Yersinia pestis Angola                                     | 47.6 | 4504254 | Yersinia pestis Angola<br>plasmid new pCD                                        | 44.6 | 68190  |
| Yersinia pestis Angola                                     | 47.6 | 4504254 | Yersinia pestis Angola<br>plasmid pMT-pPCP                                       | 50   | 114570 |
| Yersinia pestis Antiqua                                    | 47.7 | 4702289 | Yersinia pestis Antiqua<br>plasmid pMT                                           | 50.2 | 96471  |
| Yersinia pestis Antiqua                                    | 47.7 | 4702289 | Yersinia pestis Antiqua<br>plasmid pPCP                                          | 45.4 | 10777  |
| Yersinia pestis Antiqua                                    | 47.7 | 4702289 | Yersinia pestis Antiqua<br>plasmid pCD                                           | 44.8 | 70299  |
| Yersinia pestis<br>Nepal516                                | 47.6 | 4534590 | Yersinia pestis<br>Nepal516 plasmid pMT                                          | 50.2 | 100918 |
| Yersinia pestis<br>Nepal516                                | 47.6 | 4534590 | Yersinia pestis<br>Nepal516 plasmid pPCP                                         | 45.4 | 10778  |
| Yersinia pestis<br>Pestoides F                             | 47.6 | 4517345 | Yersinia pestis<br>Pestoides F plasmid CD                                        | 44.9 | 71507  |
| Yersinia pestis<br>Pestoides F                             | 47.6 | 4517345 | Yersinia pestis<br>Pestoides F plasmid MT                                        | 52   | 137010 |

|                                               |      |         |                                                                |      |        |
|-----------------------------------------------|------|---------|----------------------------------------------------------------|------|--------|
| Yersinia pestis Z176003                       | 47.7 | 4553586 | Yersinia pestis Z176003<br>plasmid pCD1                        | 44.6 | 68342  |
| Yersinia pestis Z176003                       | 47.7 | 4553586 | Yersinia pestis Z176003<br>plasmid pPCP1                       | 45.3 | 9609   |
| Yersinia pestis biovar<br>Microtus str. 91001 | 47.7 | 4595065 | Yersinia pestis biovar<br>Microtus str. 91001<br>plasmid pCRY  | 49.1 | 21742  |
| Yersinia pestis biovar<br>Microtus str. 91001 | 47.7 | 4595065 | Yersinia pestis biovar<br>Microtus str. 91001<br>plasmid pCD1  | 44.8 | 70159  |
| Yersinia pestis biovar<br>Microtus str. 91001 | 47.7 | 4595065 | Yersinia pestis biovar<br>Microtus str. 91001<br>plasmid pMT1  | 50.3 | 106642 |
| Yersinia pestis biovar<br>Microtus str. 91001 | 47.7 | 4595065 | Yersinia pestis biovar<br>Microtus str. 91001<br>plasmid pPCP1 | 45.3 | 9609   |
| Yersinia pestis strain<br>CO92                | 47.6 | 4653728 | Yersinia pestis plasmid<br>pCD1                                | 44.8 | 70305  |
| Yersinia pestis strain<br>CO92                | 47.6 | 4653728 | Yersinia pestis plasmid<br>pPCP1                               | 45.3 | 9612   |
| Yersinia pestis strain<br>CO92                | 47.6 | 4653728 | Yersinia pestis plasmid<br>pMT1                                | 50.2 | 96210  |
| Yersinia<br>pseudotuberculosis IP<br>31758    | 47.5 | 4723306 | Yersinia<br>pseudotuberculosis IP<br>31758 plasmid 59kb        | 40.2 | 58679  |
| Yersinia<br>pseudotuberculosis IP<br>31758    | 47.5 | 4723306 | Yersinia<br>pseudotuberculosis IP<br>31758 plasmid 153kb       | 40.4 | 153140 |
| Yersinia<br>pseudotuberculosis IP<br>32953    | 47.6 | 4744671 | Yersinia<br>pseudotuberculosis IP<br>32953 plasmid pYV         | 44.6 | 68525  |
| Yersinia<br>pseudotuberculosis IP<br>32953    | 47.6 | 4744671 | Yersinia<br>pseudotuberculosis IP<br>32953 plasmid             | 44.6 | 27702  |

|                     |      |         |
|---------------------|------|---------|
| Yersinia            |      |         |
| pseudotuberculosis  | 47.5 | 4695619 |
| PB1/+               |      |         |
| Zymomonas mobilis   |      |         |
| subsp. mobilis NCIB | 46.8 | 2124771 |
| 11163               |      |         |
| Zymomonas mobilis   |      |         |
| subsp. mobilis NCIB | 46.8 | 2124771 |
| 11163               |      |         |
| Zymomonas mobilis   |      |         |
| subsp. mobilis NCIB | 46.8 | 2124771 |
| 11163               |      |         |

|                     |      |       |
|---------------------|------|-------|
| Yersinia            |      |       |
| pseudotuberculosis  | 44.7 | 69812 |
| PB1/+ plasmid       |      |       |
| Zymomonas mobilis   |      |       |
| subsp. mobilis NCIB | 42.3 | 53380 |
| 11163 plasmid       |      |       |
| Zymomonas mobilis   |      |       |
| subsp. mobilis NCIB | 43.8 | 40818 |
| 11163 plasmid       |      |       |
| Zymomonas mobilis   |      |       |
| subsp. mobilis NCIB | 36.4 | 4551  |
| 11163 plasmid       |      |       |
