# Supplementary material for: Comparative Analyses of Base Compositions, DNA Sizes, and Dinucleotide Frequency Profiles in Archaeal and Bacterial Chromosomes and Plasmids
Source: PubMed Central journal article supplement (PMC3321278; doi:10.1155/2012/342482), 2012-03-26
Supplement: 342482.f2.pdf [file 342482.f2.pdf]

Supplementary Table S2. Pairs of chromosome and plasmid in archaea.

| Organism                          | Chromosome GC % | Chromosome size (bp) | Plasmid                                   | Plasmid GC % | Plasmid size (bp) |
|-----------------------------------|-----------------|----------------------|-------------------------------------------|--------------|-------------------|
| Archaeoglobus profundus DSM 5631  | 42              | 1560622              | Archaeoglobus profundus DSM 5631          | 39.8         | 2801              |
| Halalkalicoccus jeotgali B3       | 65              | 2809118              | Halalkalicoccus jeotgali B3 plasmid 1     | 55.3         | 406285            |
| Halalkalicoccus jeotgali B3       | 65              | 2809118              | Halalkalicoccus jeotgali B3 plasmid 2     | 54.2         | 363534            |
| Halalkalicoccus jeotgali B3       | 65              | 2809118              | Halalkalicoccus jeotgali B3 plasmid 3     | 58.9         | 44576             |
| Halalkalicoccus jeotgali B3       | 65              | 2809118              | Halalkalicoccus jeotgali B3 plasmid 4     | 47.6         | 23727             |
| Halalkalicoccus jeotgali B3       | 65              | 2809118              | Halalkalicoccus jeotgali B3 plasmid 5     | 47.6         | 23727             |
| Halalkalicoccus jeotgali B3       | 65              | 2809118              | Halalkalicoccus jeotgali B3 plasmid 6     | 60.6         | 6951              |
| Haloarcula marismortui ATCC 43049 | 62.4            | 3131724              | Haloarcula marismortui ATCC 43049 plasmid | 54.3         | 33303             |
| Haloarcula marismortui ATCC 43049 | 62.4            | 3131724              | Haloarcula marismortui ATCC 43049 plasmid | 55.6         | 33452             |
| Haloarcula marismortui ATCC 43049 | 62.4            | 3131724              | Haloarcula marismortui ATCC 43049 plasmid | 60           | 39521             |
| Haloarcula marismortui ATCC 43049 | 62.4            | 3131724              | Haloarcula marismortui ATCC 43049 plasmid | 57.3         | 50060             |
| Haloarcula marismortui ATCC 43049 | 62.4            | 3131724              | Haloarcula marismortui ATCC 43049 plasmid | 54.5         | 132678            |
| Haloarcula marismortui ATCC 43049 | 62.4            | 3131724              | Haloarcula marismortui ATCC 43049 plasmid | 58.3         | 155300            |
| Haloarcula marismortui ATCC 43049 | 62.4            | 3131724              | Haloarcula marismortui ATCC 43049 plasmid | 59.1         | 410554            |
| Haloarcula marismortui ATCC 43049 | 57.2            | 288050               | Haloarcula marismortui ATCC 43049 plasmid | 54.3         | 33303             |
| Haloarcula marismortui ATCC 43049 | 57.2            | 288050               | Haloarcula marismortui ATCC 43049 plasmid | 55.6         | 33452             |

|                                          |      |         |                                              |      |        |
|------------------------------------------|------|---------|----------------------------------------------|------|--------|
| Haloarcula marismortui<br>ATCC 43049     | 57.2 | 288050  | Haloarcula marismortui<br>ATCC 43049 plasmid | 60   | 39521  |
| Haloarcula marismortui<br>ATCC 43049     | 57.2 | 288050  | Haloarcula marismortui<br>ATCC 43049 plasmid | 57.3 | 50060  |
| Haloarcula marismortui<br>ATCC 43049     | 57.2 | 288050  | Haloarcula marismortui<br>ATCC 43049 plasmid | 54.5 | 132678 |
| Haloarcula marismortui<br>ATCC 43049     | 57.2 | 288050  | Haloarcula marismortui<br>ATCC 43049 plasmid | 58.3 | 155300 |
| Haloarcula marismortui<br>ATCC 43049     | 57.2 | 288050  | Haloarcula marismortui<br>ATCC 43049 plasmid | 59.1 | 410554 |
| Halobacterium<br>salinarum R1            | 68   | 2000962 | Halobacterium<br>salinarum R1 plasmid        | 57.4 | 147625 |
| Halobacterium<br>salinarum R1            | 68   | 2000962 | Halobacterium<br>salinarum R1 plasmid        | 58.6 | 194963 |
| Halobacterium<br>salinarum R1            | 68   | 2000962 | Halobacterium<br>salinarum R1 plasmid        | 59.8 | 284332 |
| Halobacterium<br>salinarum R1            | 68   | 2000962 | Halobacterium<br>salinarum R1 plasmid        | 57.9 | 40894  |
| Halobacterium sp. NRC-<br>1              | 67.9 | 2014239 | Halobacterium sp. NRC-<br>1 plasmid pNRC200  | 59.2 | 365425 |
| Halobacterium sp. NRC-<br>1              | 67.9 | 2014239 | Halobacterium sp. NRC-<br>1 plasmid pNRC100  | 57.9 | 191346 |
| Haloferax volcanii DS2                   | 66.6 | 2847757 | Haloferax volcanii DS2<br>plasmid pHV1       | 55.5 | 85092  |
| Haloferax volcanii DS2                   | 66.6 | 2847757 | Haloferax volcanii DS2<br>plasmid pHV2       | 56.1 | 6359   |
| Haloferax volcanii DS2                   | 66.6 | 2847757 | Haloferax volcanii DS2<br>plasmid pHV3       | 65.6 | 437906 |
| Haloferax volcanii DS2                   | 66.6 | 2847757 | Haloferax volcanii DS2<br>plasmid pHV4       | 61.7 | 635786 |
| Halogeometricum<br>borinquense DSM 11551 | 61.1 | 2820544 | Halogeometricum<br>borinquense DSM 11551     | 56.1 | 362194 |
| Halogeometricum<br>borinquense DSM 11551 | 61.1 | 2820544 | Halogeometricum<br>borinquense DSM 11551     | 57.3 | 339010 |

|                                          |      |         |                                            |      |        |
|------------------------------------------|------|---------|--------------------------------------------|------|--------|
| Halogeometricum<br>borinquense DSM 11551 | 61.1 | 2820544 | Halogeometricum<br>borinquense DSM 11551   | 56.5 | 210350 |
| Halogeometricum<br>borinquense DSM 11551 | 61.1 | 2820544 | Halogeometricum<br>borinquense DSM 11551   | 58.8 | 194834 |
| Halogeometricum<br>borinquense DSM 11551 | 61.1 | 2820544 | Halogeometricum<br>borinquense DSM 11551   | 64.6 | 17535  |
| Halomicrobium<br>mukohataei DSM 12286    | 65.6 | 3110487 | Halomicrobium<br>mukohataei DSM 12286      | 64.2 | 221862 |
| Halopiger xanaduensis<br>SH-6            | 66   | 3668009 | Halopiger xanaduensis<br>SH-6 plasmid      | 61.5 | 436718 |
| Halopiger xanaduensis<br>SH-6            | 66   | 3668009 | Halopiger xanaduensis<br>SH-6 plasmid      | 59   | 181778 |
| Halopiger xanaduensis<br>SH-6            | 66   | 3668009 | Halopiger xanaduensis<br>SH-6 plasmid      | 62.2 | 68763  |
| Haloquadratum walsbyi<br>DSM 16790       | 47.9 | 3132494 | Haloquadratum walsbyi<br>DSM 16790 plasmid | 47.7 | 46867  |
| Halorubrum<br>lacusprofundi ATCC         | 66.7 | 2735295 | Halorubrum<br>lacusprofundi ATCC           | 54.9 | 431338 |
| Halorubrum<br>lacusprofundi ATCC         | 57.1 | 525943  | Halorubrum<br>lacusprofundi ATCC           | 54.9 | 431338 |
| Haloterrigena<br>turkmenica DSM 5511     | 65.8 | 3889038 | Haloterrigena<br>turkmenica DSM 5511       | 61.2 | 698495 |
| Haloterrigena<br>turkmenica DSM 5511     | 65.8 | 3889038 | Haloterrigena<br>turkmenica DSM 5511       | 59.8 | 413648 |
| Haloterrigena<br>turkmenica DSM 5511     | 65.8 | 3889038 | Haloterrigena<br>turkmenica DSM 5511       | 54.7 | 180781 |
| Haloterrigena<br>turkmenica DSM 5511     | 65.8 | 3889038 | Haloterrigena<br>turkmenica DSM 5511       | 64.6 | 171943 |
| Haloterrigena<br>turkmenica DSM 5511     | 65.8 | 3889038 | Haloterrigena<br>turkmenica DSM 5511       | 60   | 71062  |
| Haloterrigena<br>turkmenica DSM 5511     | 65.8 | 3889038 | Haloterrigena<br>turkmenica DSM 5511       | 58.1 | 15815  |
| Methanocaldococcus<br>fervens AG86       | 32.2 | 1485061 | Methanocaldococcus<br>fervens AG86 plasmid | 32.8 | 22190  |

|                                                     |      |         |                                                             |      |        |
|-----------------------------------------------------|------|---------|-------------------------------------------------------------|------|--------|
| Methanocaldococcus sp.<br>FS406-22                  | 32   | 1760939 | Methanocaldococcus sp.<br>FS406-22 plasmid                  | 31.6 | 12197  |
| Methanocaldococcus<br>vulcanius M7                  | 31.5 | 1746329 | Methanocaldococcus<br>vulcanius M7 plasmid                  | 46.3 | 10704  |
| Methanocaldococcus<br>vulcanius M7                  | 31.5 | 1746329 | Methanocaldococcus<br>vulcanius M7 plasmid                  | 30.1 | 4704   |
| Methanococcus<br>jannaschii                         | 31.4 | 1664970 | Methanococcus<br>jannaschii large extra-                    | 28.2 | 58407  |
| Methanococcus<br>jannaschii                         | 31.4 | 1664970 | Methanococcus<br>jannaschii small extra-                    | 28.9 | 16550  |
| Methanococcus<br>maripaludis C5                     | 33   | 1780761 | Methanococcus<br>maripaludis C5 plasmid                     | 27.2 | 8285   |
| Methanohalobium<br>evestigatum Z-7303               | 36.6 | 2242317 | Methanohalobium<br>evestigatum Z-7303                       | 33.6 | 163915 |
| Methanosaeta concilii<br>GP-6                       | 51   | 3008626 | Methanosaeta concilii<br>GP-6 plasmid pGP6                  | 43.9 | 18019  |
| Methanosarcina barkeri<br>str. fusaro               | 39.3 | 4837408 | Methanosarcina barkeri<br>str. fusaro plasmid 1             | 33.6 | 36358  |
| Methanothermobacter<br>marburgensis str.<br>Marburg | 48.6 | 1634695 | Methanothermobacter<br>marburgensis str.<br>Marburg plasmid | 45.4 | 4440   |
| Methanothermococcus<br>okinawensis IH1              | 29.3 | 1662525 | Methanothermococcus<br>okinawensis IH1<br>plasmid pMETOK01  | 26.8 | 14930  |
| Natrialba magadii ATCC<br>43099                     | 61.4 | 3751858 | Natrialba magadii ATCC<br>43099 plasmid                     | 60.1 | 378348 |
| Natrialba magadii ATCC<br>43099                     | 61.4 | 3751858 | Natrialba magadii ATCC<br>43099 plasmid                     | 61.9 | 58487  |
| Natronomonas pharaonis<br>DSM 2160                  | 63.4 | 2595221 | Natronomonas pharaonis<br>DSM 2160 plasmid                  | 57.2 | 130989 |
| Natronomonas pharaonis<br>DSM 2160                  | 63.4 | 2595221 | Natronomonas pharaonis<br>DSM 2160 plasmid                  | 60.6 | 23486  |
| Sulfolobus islandicus<br>L.D.8.5                    | 35.3 | 2722032 | Sulfolobus islandicus<br>L.D.8.5 plasmid                    | 36.1 | 26615  |

Sulfolobus islandicus 35.3  
Y.N.15.51 2812165

Sulfolobus islandicus 36.1  
Y.N.15.51 plasmid 42245
