# Supplementary material for: Comparative Analyses of Base Compositions, DNA Sizes, and Dinucleotide Frequency Profiles in Archaeal and Bacterial Chromosomes and Plasmids
Source: PubMed Central journal article supplement (PMC3321278; doi:10.1155/2012/342482), 2012-03-26
Supplement: 342482.f3.pdf [file 342482.f3.pdf]

Supplementary Table S3. Bacterial chromosomes compared in this analysis.

| Organism                                                         | GC content (%) | Chromosome size (bp) | Plasmid |
|------------------------------------------------------------------|----------------|----------------------|---------|
| <i>Acaryochloris marina</i><br>MBIC11017                         | 47.3           | 6503724              | present |
| <i>Acetobacter</i><br>pasteurianus IFO 3283-                     | 53             | 2907495              | absent  |
| <i>Acetohalobium</i><br>arabaticum DSM 5501                      | 36.6           | 2469596              | absent  |
| <i>Acholeplasma laidlawii</i>                                    | 31.9           | 1496992              | absent  |
| <i>Achromobacter</i><br>xylooxidans A8                           | 66             | 7013095              | present |
| <i>Acidaminococcus</i><br>fermentans DSM 20731                   | 55.8           | 2329769              | absent  |
| <i>Acidimicrobium</i><br>ferrooxidans DSM                        | 68.3           | 2158157              | absent  |
| <i>Acidiphilium cryptum</i>                                      | 68             | 3389227              | present |
| <i>Acidiphilium</i><br>multivorum AIU301                         | 67.6           | 3749411              | present |
| <i>Acidithiobacillus</i><br>ferrooxidans ATCC                    | 58.8           | 2982397              | absent  |
| <i>Acidithiobacillus</i><br>ferrooxidans ATCC                    | 58.9           | 2885038              | absent  |
| <i>Acidobacterium</i><br>capsulatum ATCC                         | 60.5           | 4127356              | absent  |
| <i>Acidobacterium</i> sp.<br>MP5ACTX9                            | 60.5           | 4309153              | present |
| <i>Acidothermus</i><br>cellulolyticus 11B                        | 66.9           | 2443540              | absent  |
| <i>Acidovorax avenae</i><br>subsp. <i>avenae</i> ATCC            | 68.8           | 5482170              | absent  |
| <i>Acidovorax avenae</i><br>subsp. <i>citrulli</i> AAC00-1       | 68.5           | 5352772              | absent  |
| <i>Acidovorax</i> sp. JS42                                       | 66.2           | 4448856              | present |
| <i>Acinetobacter</i><br>baumannii AB0057                         | 39.2           | 4050513              | present |
| <i>Acinetobacter</i><br>baumannii AB307-0294                     | 39             | 3760981              | absent  |
| <i>Acinetobacter</i><br>baumannii ACICU                          | 39             | 3904116              | present |
| <i>Acinetobacter</i><br>baumannii ATCC                           | 38.9           | 3976747              | present |
| <i>Acinetobacter</i>                                             | 39.4           | 3936291              | present |
| <i>Acinetobacter</i>                                             | 39.2           | 3421954              | present |
| <i>Acinetobacter</i> sp. ADP1                                    | 40.4           | 3598621              | absent  |
| <i>Acinetobacter</i> sp. DR1                                     | 38.7           | 4152543              | absent  |
| <i>Actinobacillus</i><br>pleuropneumoniae L20                    | 41.3           | 2274482              | absent  |
| <i>Actinobacillus</i><br>pleuropneumoniae<br>serovar 3 str. JL03 | 41.2           | 2242062              | absent  |
| <i>Actinobacillus</i><br>pleuropneumoniae<br>serovar 7 str. AP76 | 41.2           | 2331981              | present |

|                                                      |      |         |         |
|------------------------------------------------------|------|---------|---------|
| Actinobacillus succinogenes 130Z                     | 44.9 | 2319663 | absent  |
| Actinosynnema mirum DSM 43827                        | 73.7 | 8248144 | absent  |
| Aerococcus urinae ACS-120-V-Co110a                   | 41.9 | 2080974 | absent  |
| Aeromonas hydrophila subsp. hydrophila               | 61.5 | 4744448 | absent  |
| Aeromonas salmonicida subsp. salmonicida             | 58.5 | 4702402 | absent  |
| Aeromonas veronii                                    | 58.7 | 4551783 | absent  |
| Aggregatibacter actinomycetemcomitans D11S-1         | 44.6 | 2105764 | absent  |
| Aggregatibacter aphrophilus NJ8700                   | 42.2 | 2313035 | absent  |
| Agrobacterium radiobacter K84                        | 60.3 | 4005130 | present |
| Agrobacterium radiobacter K84                        | 59.8 | 2650913 | present |
| Agrobacterium sp. H13-                               | 58.8 | 2823930 | present |
| Agrobacterium tumefaciens strain C58                 | 59.4 | 2841580 | absent  |
| Agrobacterium tumefaciens strain C58 (Cereon) linear | 59.3 | 2075577 | absent  |
| Agrobacterium vitis S4                               | 57.7 | 3726375 | present |
| Agrobacterium vitis S4 chromosome 2                  | 57.5 | 1283187 | present |
| Akkermansia muciniphila ATCC                         | 55.8 | 2664102 | absent  |
| Alcanivorax                                          | 54.7 | 3120143 | absent  |
| Alicyclophilus                                       | 68.3 | 4637013 | present |
| Alicyclophilus denitrificans K601                    | 68   | 4995263 | present |
| Alicyclobacillus acidocaldarius subsp.               | 62.3 | 3018755 | present |
| Aliivibrio salmonicida LFI1238 chromosome            | 40.1 | 83540   | present |
| Aliivibrio salmonicida LFI1238 chromosome 1          | 39.2 | 3325165 | present |
| Aliivibrio salmonicida LFI1238 chromosome 2          | 38.2 | 1206461 | present |
| Alkalilimnicola ehrlichei MLHE-1                     | 67.5 | 3275944 | absent  |
| Alkaliphilus metalliredigens QYMF                    | 36.8 | 4929566 | absent  |
| Alkaliphilus oremlandii                              | 36.3 | 3123558 | absent  |
| Allochromatium vinosum DSM 180                       | 64.4 | 3526903 | present |
| Alpha proteobacterium IMCC1322                       | 48.9 | 2753527 | absent  |
| Alteromonas macleodii Deep ecotype                   | 44.9 | 4412282 | absent  |

|                                         |      |          |         |
|-----------------------------------------|------|----------|---------|
| Alteromonas sp. SN2                     | 43.5 | 4972148  | absent  |
| Aminobacterium colombiense DSM          | 45.3 | 1980592  | absent  |
| Ammonifex degensii                      | 59.4 | 2129237  | present |
| Amycolatopsis mediterranei U32          | 71.3 | 10236715 | absent  |
| Amycolicococcus subflavus DQS3-9A1      | 62.2 | 4738809  | present |
| Anabaena variabilis ATCC 29413          | 46.5 | 37151    | present |
| Anabaena variabilis ATCC 29413          | 41.4 | 6365727  | present |
| Anaerocellum thermophilum DSM           | 35.2 | 2919718  | present |
| Anaerococcus prevotii DSM 20548         | 36.1 | 1883067  | present |
| Anaerolinea thermophila UNI-1           | 53.8 | 3532378  | absent  |
| Anaeromyxobacter dehalogenans 2CP-1     | 74.7 | 5029329  | absent  |
| Anaeromyxobacter dehalogenans 2CP-C     | 74.9 | 5013479  | absent  |
| Anaeromyxobacter sp. Fw109-5            | 73.5 | 5277990  | absent  |
| Anaeromyxobacter sp.                    | 74.8 | 5061632  | absent  |
| Anaplasma centrale str.                 | 50   | 1206806  | absent  |
| Anaplasma marginale                     | 49.8 | 1202435  | absent  |
| Anaplasma marginale str St. Maries      | 49.8 | 1197687  | absent  |
| Anaplasma phagocytophilum HZ            | 41.6 | 1471282  | absent  |
| Anoxybacillus flavithermus WK1          | 41.8 | 2846746  | absent  |
| Aquifex aeolicus                        | 43.5 | 1551335  | present |
| Arcanobacterium haemolyticum DSM        | 53.1 | 1986154  | absent  |
| Arcobacter butzleri                     | 27   | 2341251  | absent  |
| Arcobacter nitrofigilis DSM 7299        | 28.4 | 3192235  | absent  |
| Aromatoleum aromaticum EbN1             | 65.1 | 4296230  | absent  |
| Arthrobacter arilaitensis               | 59.3 | 3859257  | present |
| Arthrobacter aurescens                  | 62.3 | 4597686  | present |
| Arthrobacter chlorophenolicus A6        | 66.3 | 4395537  | present |
| Arthrobacter phenanthrenivorans         | 65.6 | 4250414  | present |
| Arthrobacter sp. FB24                   | 65.5 | 4698945  | present |
| Aster yellows witches-broom phytoplasma | 26.9 | 706569   | present |
| Asticcacaulis excentricus CB 48         | 59.2 | 2588221  | present |
| Asticcacaulis excentricus CB 48         | 60.4 | 1315949  | present |

|                                                 |      |         |         |
|-------------------------------------------------|------|---------|---------|
| Atopobium parvulum<br>DSM 20469                 | 45.7 | 1543805 | absent  |
| Azoarcus sp. BH72                               | 67.9 | 4376040 | absent  |
| Azorhizobium<br>caulinodans ORS 571             | 67.3 | 5369772 | absent  |
| Azospirillum sp. B510                           | 67.8 | 3311395 | present |
| Azotobacter vinelandii                          | 65.7 | 5365318 | absent  |
| Bacillus<br>amyloliquefaciens                   | 46.1 | 3980199 | absent  |
| Bacillus<br>amyloliquefaciens                   | 46.5 | 3918589 | absent  |
| Bacillus anthracis CI                           | 35.4 | 5196054 | present |
| Bacillus anthracis str.                         | 35.4 | 5227419 | present |
| Bacillus anthracis str.                         | 35.4 | 5227293 | absent  |
| Bacillus anthracis str.<br>Ames 0581            | 35.4 | 5227419 | present |
| Bacillus anthracis str.<br>CDC 684              | 35.4 | 5230115 | present |
| Bacillus anthracis str.                         | 35.4 | 5228663 | absent  |
| Bacillus atrophaeus                             | 43.2 | 4168266 | absent  |
| Bacillus cellulosilyticus<br>DSM 2522           | 36.5 | 4681672 | absent  |
| Bacillus cereus                                 | 35.4 | 5269628 | present |
| Bacillus cereus AH187                           | 35.6 | 5269030 | present |
| Bacillus cereus AH820                           | 35.4 | 5302683 | present |
| Bacillus cereus ATCC                            | 35.6 | 5224283 | absent  |
| Bacillus cereus ATCC                            | 35.3 | 5411809 | present |
| Bacillus cereus B4264                           | 35.3 | 5419036 | absent  |
| Bacillus cereus G9842                           | 35.3 | 5387334 | present |
| Bacillus cereus Q1                              | 35.6 | 5214195 | present |
| Bacillus cereus subsp.<br>cytotoxis NVH 391-98  | 35.9 | 4087024 | present |
| Bacillus cereus ZK                              | 35.4 | 5300915 | absent  |
| Bacillus clausii KSM-                           | 44.8 | 4303871 | absent  |
| Bacillus coagulans 2-6                          | 47.3 | 3073079 | absent  |
| Bacillus halodurans                             | 43.7 | 4202352 | absent  |
| Bacillus licheniformis<br>ATCC 14580            | 46.2 | 4222597 | absent  |
| Bacillus licheniformis                          | 46.2 | 4222645 | absent  |
| Bacillus megaterium                             | 38.1 | 5097447 | absent  |
| Bacillus megaterium<br>QM B1551                 | 38.3 | 5097129 | present |
| Bacillus pseudofirmus                           | 40.3 | 3858997 | present |
| Bacillus pumilus                                | 41.3 | 3704465 | absent  |
| Bacillus<br>selenitireducens MLS10              | 48.7 | 3592487 | absent  |
| Bacillus subtilis                               | 43.5 | 4215606 | absent  |
| Bacillus subtilis BSn5                          | 43.8 | 4093599 | absent  |
| Bacillus subtilis subsp.<br>spizizenii str. W23 | 43.9 | 4027676 | absent  |
| Bacillus thuringiensis                          | 35.4 | 5237682 | absent  |
| Bacillus thuringiensis                          | 35.3 | 5330088 | present |
| Bacillus thuringiensis<br>str. Al Hakam         | 35.4 | 5257091 | present |

|                                           |      |         |         |
|-------------------------------------------|------|---------|---------|
| Bacillus tusciae DSM                      | 59.1 | 3384766 | absent  |
| Bacillus<br>weihenstephanensis            | 35.6 | 5262775 | present |
| Bacteroides fragilis<br>NCTC 9343         | 43.2 | 5205140 | present |
| Bacteroides fragilis                      | 43.3 | 5277274 | present |
| Bacteroides helcogenes<br>P 36-108        | 44.7 | 3998906 | absent  |
| Bacteroides salanitronis<br>DSM 18170     | 46.6 | 4242803 | present |
| Bacteroides<br>thetaitaomicron VPI-       | 42.8 | 6260361 | absent  |
| Bacteroides vulgatus<br>ATCC 8482         | 42.2 | 5163189 | absent  |
| Bartonella bacilliformis                  | 38.2 | 1445021 | absent  |
| Bartonella clarridgeiae                   | 35.7 | 1522743 | absent  |
| Bartonella grahamii                       | 38.1 | 2341328 | present |
| Bartonella henselae str.<br>Houston-1     | 38.2 | 1931047 | absent  |
| Bartonella quintana str.<br>Toulouse      | 38.8 | 1581384 | absent  |
| Bartonella tribocorum<br>CIP 105476       | 38.9 | 2619061 | present |
| Baumannia<br>cicadellinicola str. Hc      | 33.2 | 686194  | absent  |
| Bdellovibrio<br>bacteriovorus HD100       | 50.6 | 3782950 | absent  |
| Beijerinckia indica<br>subsp. indica ATCC | 57.1 | 4170153 | present |
| Beutenbergia cavernae<br>DSM 12333        | 73.1 | 4669183 | absent  |
| Bifidobacterium<br>adolescentis ATCC      | 59.2 | 2089645 | absent  |
| Bifidobacterium<br>animalis subsp. lactis | 60.5 | 1933695 | absent  |
| Bifidobacterium<br>animalis subsp. lactis | 60.5 | 1938709 | absent  |
| Bifidobacterium<br>animalis subsp. lactis | 60.5 | 1938483 | absent  |
| Bifidobacterium<br>bifidum PRL2010        | 62.7 | 2214656 | absent  |
| Bifidobacterium                           | 62.8 | 2186882 | absent  |
| Bifidobacterium                           | 58.5 | 2636367 | absent  |
| Bifidobacterium<br>longum DJO10A          | 60.1 | 2375792 | present |
| Bifidobacterium<br>longum NCC2705         | 60.1 | 2256640 | absent  |
| Bifidobacterium<br>longum subsp. infantis | 60.1 | 2400312 | present |
| Bifidobacterium<br>longum subsp. infantis | 59.9 | 2832748 | absent  |
| Bifidobacterium<br>longum subsp. longum   | 59.9 | 2265943 | absent  |

|                                                        |      |         |         |
|--------------------------------------------------------|------|---------|---------|
| Bifidobacterium longum subsp. longum                   | 60.3 | 2385164 | absent  |
| Bifidobacterium longum subsp. longum                   | 59.8 | 2477838 | absent  |
| Blattabacterium sp. (Blattella germanica)              | 27.1 | 636850  | absent  |
| Blattabacterium sp. (Periplaneta americana) str. BPLAN | 28.2 | 636994  | present |
| Blochmannia floridanus                                 | 27.4 | 705557  | absent  |
| Blochmannia pennsylvanicus str.                        | 29.6 | 791654  | absent  |
| Bordetella avium 197N                                  | 61.6 | 3732255 | absent  |
| Bordetella                                             | 68.1 | 5339179 | absent  |
| Bordetella parapertussis                               | 68.1 | 4773551 | absent  |
| Bordetella pertussis                                   | 67.7 | 4086189 | absent  |
| Bordetella petrii                                      | 65.5 | 5287950 | absent  |
| Borrelia afzelii PKo                                   | 28.3 | 905394  | present |
| Borrelia burgdorferi                                   | 28.6 | 910724  | present |
| Borrelia burgdorferi                                   | 28.5 | 906707  | present |
| Borrelia duttonii Ly                                   | 27.6 | 931674  | present |
| Borrelia garinii PBi linear genome                     | 28.3 | 904246  | absent  |
| Borrelia hermsii DAH                                   | 29.8 | 922307  | absent  |
| Borrelia recurrentis A1                                | 27.5 | 930981  | present |
| Borrelia turicatae                                     | 29.1 | 917330  | absent  |
| Brachybacterium faecium DSM 4810                       | 72   | 3614992 | absent  |
| Brachyspira hyodysenteriae WA1                         | 27.1 | 3000694 | present |
| Brachyspira murdochii DSM 12563                        | 27.8 | 3241804 | absent  |
| Brachyspira pilosicoli                                 | 27.9 | 2586443 | absent  |
| Bradyrhizobium                                         | 64.1 | 9105828 | absent  |
| Bradyrhizobium sp.                                     | 64.9 | 8264687 | present |
| Bradyrhizobium sp.                                     | 65.5 | 7456587 | absent  |
| Brevibacillus brevis NBRC 100599                       | 47.3 | 6296436 | absent  |
| Brevundimonas subvibrioides ATCC                       | 68.4 | 3445263 | absent  |
| Brucella abortus bv. 1 str. 9-941                      | 57.2 | 2124241 | absent  |
| Brucella abortus bv. 1 str. 9-941 chromosome           | 57.3 | 1162204 | absent  |
| Brucella abortus S19                                   | 57.2 | 2122487 | absent  |
| Brucella abortus S19 chromosome 2                      | 57.3 | 1161449 | absent  |
| Brucella canis ATCC 23365 chromosome I                 | 57.2 | 2105969 | absent  |
| Brucella canis ATCC 23365 chromosome II                | 57.3 | 1206800 | absent  |
| Brucella melitensis                                    | 57.2 | 2117144 | absent  |
| Brucella melitensis ATCC 23457                         | 57.2 | 2125701 | absent  |

|                                                |      |         |         |
|------------------------------------------------|------|---------|---------|
| Brucella melitensis<br>ATCC 23457              | 57.3 | 1185518 | absent  |
| Brucella melitensis<br>biovar Abortus 2308     | 57.2 | 2121359 | absent  |
| Brucella melitensis<br>biovar Abortus 2308     | 57.3 | 1156948 | absent  |
| Brucella melitensis<br>chromosome II           | 57.3 | 1177787 | absent  |
| Brucella microti CCM                           | 57.2 | 2117050 | absent  |
| Brucella microti CCM<br>4915 chromosome 2      | 57.3 | 1220319 | absent  |
| Brucella ovis ATCC<br>25840 chromosome I       | 57.2 | 2111370 | absent  |
| Brucella ovis ATCC<br>25840 chromosome II      | 57.2 | 1164220 | absent  |
| Brucella suis 1330                             | 57.2 | 2107794 | absent  |
| Brucella suis 1330<br>chromosome II            | 57.3 | 1207381 | absent  |
| Brucella suis ATCC                             | 57.1 | 1923763 | absent  |
| Brucella suis ATCC<br>23445 chromosome II      | 57.3 | 1400844 | absent  |
| Buchnera aphidicola<br>(Baizongia pistaciae)   | 25.3 | 615980  | present |
| Buchnera aphidicola<br>(Cinara tujafilina)     | 23   | 444925  | absent  |
| Buchnera aphidicola str.<br>5A (Acyrtosiphon   | 26.3 | 642122  | absent  |
| Buchnera aphidicola str.<br>Cc (Cinara cedri)  | 20.1 | 416380  | absent  |
| Buchnera aphidicola str.<br>Sg (Schizaphis     | 25.3 | 641454  | absent  |
| Buchnera aphidicola str.<br>Tuc7 (Acyrtosiphon | 26.3 | 641895  | absent  |
| Buchnera sp. APS                               | 26.3 | 640681  | present |
| Burkholderia ambifaria<br>MC40-6 chromosome 1  | 66.9 | 3443583 | present |
| Burkholderia ambifaria<br>MC40-6 chromosome 2  | 66.5 | 2769414 | present |
| Burkholderia ambifaria<br>MC40-6 chromosome 3  | 65.9 | 1127947 | present |
| Burkholderia<br>cenocepacia AU 1054            | 66.9 | 3294563 | absent  |
| Burkholderia<br>cenocepacia AU 1054            | 66.9 | 2788459 | absent  |
| Burkholderia<br>cenocepacia AU 1054            | 67   | 1196094 | absent  |
| Burkholderia<br>cenocepacia HI2424             | 66.8 | 3483902 | present |
| Burkholderia<br>cenocepacia HI2424             | 66.9 | 2998664 | present |
| Burkholderia<br>cenocepacia HI2424             | 67.3 | 1055417 | present |
| Burkholderia<br>cenocepacia J2315              | 66.7 | 3870082 | present |

|                                                          |      |         |         |
|----------------------------------------------------------|------|---------|---------|
| Burkholderia<br>cenocepacia J2315                        | 67.3 | 3217062 | present |
| Burkholderia<br>cenocepacia J2315                        | 66.9 | 875977  | present |
| Burkholderia<br>cenocepacia MC0-3                        | 66.7 | 3532883 | absent  |
| Burkholderia<br>cenocepacia MC0-3                        | 66.6 | 3213911 | absent  |
| Burkholderia<br>cenocepacia MC0-3                        | 66.2 | 1224595 | absent  |
| Burkholderia cepacia<br>AMMD chromosome 1                | 66.9 | 3556545 | present |
| Burkholderia cepacia<br>AMMD chromosome 2                | 66.8 | 2646969 | present |
| Burkholderia cepacia<br>AMMD chromosome 3                | 66.5 | 1281472 | present |
| Burkholderia gladioli                                    | 67.5 | 4413616 | present |
| Burkholderia gladioli<br>BSR3 chromosome 2               | 68.6 | 3700833 | present |
| Burkholderia glumae                                      | 68.1 | 3906529 | present |
| Burkholderia glumae<br>BGR1 chromosome 2                 | 68.8 | 2827355 | present |
| Burkholderia mallei<br>ATCC 23344                        | 68.2 | 3510148 | absent  |
| Burkholderia mallei<br>ATCC 23344                        | 69   | 2325379 | absent  |
| Burkholderia mallei<br>NCTC 10229                        | 68.9 | 2284095 | absent  |
| Burkholderia mallei<br>NCTC 10229                        | 68.2 | 3458208 | absent  |
| Burkholderia mallei<br>NCTC 10247                        | 69   | 2352693 | absent  |
| Burkholderia mallei<br>NCTC 10247                        | 68.2 | 3495687 | absent  |
| Burkholderia mallei                                      | 68.9 | 1734922 | absent  |
| Burkholderia mallei<br>SAVP1 chromosome II               | 68.1 | 3497479 | absent  |
| Burkholderia<br>multivorans ATCC                         | 66.9 | 3448466 | present |
| Burkholderia<br>multivorans ATCC<br>17616 JGI chromosome | 67.1 | 2472928 | present |
| Burkholderia<br>multivorans ATCC<br>17616 JGI chromosome | 65.8 | 919806  | present |
| Burkholderia<br>multivorans ATCC                         | 66.9 | 3448421 | present |
| Burkholderia<br>multivorans ATCC<br>17616 Tohoku         | 67.1 | 2473162 | present |
| Burkholderia<br>multivorans ATCC<br>17616 Tohoku         | 65.8 | 919805  | present |



|                                           |      |         |         |
|-------------------------------------------|------|---------|---------|
| Burkholderia phymatum STM815              | 63   | 3479187 | present |
| Burkholderia phymatum STM815 chromosome 2 | 62.3 | 2697374 | present |
| Burkholderia phytofirmans PsJN            | 62.6 | 4467537 | present |
| Burkholderia phytofirmans PsJN            | 62.1 | 3625999 | present |
| Burkholderia pseudomallei 1106a           | 68   | 3988455 | absent  |
| Burkholderia pseudomallei 1106a           | 68.6 | 3100794 | absent  |
| Burkholderia pseudomallei 1710b           | 67.6 | 4126292 | absent  |
| Burkholderia                              | 68   | 3912947 | absent  |
| Burkholderia pseudomallei 668             | 68.6 | 3127456 | absent  |
| Burkholderia pseudomallei K96243          | 67.7 | 4074542 | absent  |
| Burkholderia pseudomallei K96243          | 68.5 | 3173005 | absent  |
| Burkholderia pseudomallei                 | 67.7 | 4098576 | absent  |
| Burkholderia rhizoxinica HKI 454          | 61.2 | 2755309 | absent  |
| Burkholderia rhizoxinica HKI 454          | 59.7 | 822304  | absent  |
| Burkholderia sp. 383 chromosome 1         | 66.2 | 3694126 | absent  |
| Burkholderia sp. 383 chromosome 2         | 66.7 | 3587082 | absent  |
| Burkholderia sp. 383 chromosome 3         | 65.3 | 1395069 | absent  |
| Burkholderia sp.                          | 63.7 | 4063449 | absent  |
| Burkholderia sp. CCGE1001                 | 63.5 | 2770302 | absent  |
| Burkholderia sp.                          | 64.1 | 3518940 | present |
| Burkholderia sp. CCGE1002                 | 63.2 | 2593966 | present |
| Burkholderia sp. CCGE1002                 | 62.6 | 1282816 | present |
| Burkholderia sp.                          | 63.4 | 4077097 | absent  |
| Burkholderia sp. CCGE1003                 | 63   | 2966498 | absent  |
| Burkholderia thailandensis E264           | 67.3 | 3809201 | absent  |
| Burkholderia thailandensis E264           | 68.1 | 2914771 | absent  |
| Burkholderia                              | 66.5 | 3652814 | present |
| Burkholderia vietnamiensis G4             | 66.8 | 2411759 | present |
| Burkholderia vietnamiensis G4             | 66.4 | 1241007 | present |

|                                                     |      |         |         |
|-----------------------------------------------------|------|---------|---------|
| Burkholderia<br>xenovorans LB400                    | 62.8 | 4895836 | absent  |
| Burkholderia<br>xenovorans LB400                    | 62.8 | 3363523 | absent  |
| Burkholderia_pseudom<br>allei_1710b                 | 68.5 | 3181762 | absent  |
| Butyrivibrio<br>proteoclasticus B316                | 40.2 | 3554804 | present |
| Butyrivibrio<br>proteoclasticus B316                | 40   | 302358  | present |
| Caldicellulosiruptor<br>hydrothermalis 108          | 36.1 | 2770676 | absent  |
| Caldicellulosiruptor<br>kristjanssonii 177R1B       | 36.1 | 2786473 | present |
| Caldicellulosiruptor<br>kronotskyensis 2002         | 35.1 | 2843785 | absent  |
| Caldicellulosiruptor<br>obsidiansis OB47            | 35.2 | 2532343 | absent  |
| Caldicellulosiruptor<br>owensensis OL               | 35.4 | 2428903 | absent  |
| Caldicellulosiruptor<br>saccharolyticus DSM         | 35.3 | 2970275 | absent  |
| Calditerrivibrio<br>nitroreducens DSM               | 35.8 | 2157835 | present |
| Campylobacter concisus                              | 39.4 | 2052007 | present |
| Campylobacter curvus                                | 44.5 | 1971264 | absent  |
| Campylobacter fetus<br>subsp. fetus 82-40           | 33.3 | 1773615 | absent  |
| Campylobacter hominis<br>ATCC BAA-381               | 31.7 | 1711273 | present |
| Campylobacter jejuni                                | 30.3 | 1777831 | absent  |
| Campylobacter jejuni<br>subsp. doylei 269.97        | 30.6 | 1845106 | absent  |
| Campylobacter jejuni<br>subsp. jejuni 81116         | 30.5 | 1628115 | absent  |
| Campylobacter jejuni<br>subsp. jejuni 81-176        | 30.6 | 1616554 | present |
| Campylobacter jejuni<br>subsp. jejuni               | 30.6 | 1664840 | present |
| Campylobacter jejuni<br>subsp. jejuni NCTC          | 30.5 | 1641481 | absent  |
| Campylobacter lari                                  | 29.7 | 1525460 | present |
| Candidatus<br>Accumulibacter                        | 64.1 | 5058518 | present |
| Candidatus<br>Amoebophilus asiaticus                | 35   | 1884364 | absent  |
| Candidatus<br>Azobacteroides<br>pseudotrichonymphae | 32.7 | 1114206 | present |
| Candidatus<br>Blochmannia vafer str.                | 27.5 | 722593  | absent  |
| Candidatus Carsonella<br>ruddii PV                  | 16.6 | 159662  | absent  |

|                                                              |      |          |         |
|--------------------------------------------------------------|------|----------|---------|
| Candidatus<br>Desulfococcus                                  | 56.2 | 3944167  | absent  |
| Candidatus<br>Desulforudis                                   | 60.8 | 2349476  | absent  |
| Candidatus<br>Hamiltonella defensa                           | 40.3 | 2110331  | present |
| 5AT (Acyrtosiphon<br>Candidatus Hodgkinia<br>cicadicola Dsem | 58.4 | 143795   | absent  |
| Candidatus Koribacter<br>versatilis Ellin345                 | 58.4 | 5650368  | absent  |
| Candidatus Liberibacter<br>asiaticus str. psy62              | 36.5 | 1226704  | absent  |
| Candidatus Liberibacter<br>solanacearum CLso-                | 35.2 | 1258278  | absent  |
| Candidatus Nitrospira                                        | 59   | 4317083  | absent  |
| Candidatus Pelagibacter<br>sp. IMCC9063                      | 31.7 | 1284727  | absent  |
| Candidatus<br>Phytoplasma                                    | 27.4 | 879959   | absent  |
| Candidatus                                                   | 21.4 | 601943   | absent  |
| Candidatus Riesia<br>pediculicola USDA                       | 28.5 | 574390   | present |
| Candidatus Ruthia<br>magnifica str. Cm<br>(Calyptogena       | 34   | 1160782  | absent  |
| Candidatus Sulcia<br>muelleri CARI                           | 21.1 | 276511   | absent  |
| Candidatus Sulcia<br>muelleri DMIN                           | 22.5 | 243933   | absent  |
| Candidatus Sulcia<br>muelleri GWSS                           | 22.4 | 245530   | absent  |
| Candidatus Sulcia<br>muelleri SMDSEM                         | 22.6 | 276984   | absent  |
| Candidatus<br>Vesicomysocius                                 | 31.6 | 1022154  | absent  |
| Candidatus Zinderia<br>insecticola CARI                      | 13.5 | 208564   | absent  |
| Capnocytophaga<br>ochracea DSM 7271                          | 39.6 | 2612925  | absent  |
| Carboxydotherrmus<br>hydrogenoformans Z-                     | 42   | 2401520  | absent  |
| Carnobacterium sp. 17-                                       | 35.3 | 2635294  | present |
| Catenulispora acidiphila<br>DSM 44928                        | 69.8 | 10467782 | absent  |
| Caulobacter crescentus                                       | 67.2 | 4016947  | absent  |
| Caulobacter crescentus<br>NA1000                             | 67.2 | 4042929  | absent  |
| Caulobacter segnis<br>ATCC 21756                             | 67.7 | 4655622  | absent  |
| Caulobacter sp. K31                                          | 67.5 | 5477872  | present |
| Cellulomonas fimi                                            | 74.7 | 4266344  | absent  |
| Cellulomonas flavigena<br>DSM 20109                          | 74.3 | 4123179  | absent  |

|                                              |      |         |         |
|----------------------------------------------|------|---------|---------|
| Cellulophaga algicola<br>DSM 14237           | 33.8 | 4888353 | absent  |
| Cellulophaga lytica                          | 32.1 | 3765936 | absent  |
| Cellvibrio japonicus                         | 52   | 4576573 | absent  |
| Chitinophaga pinensis<br>DSM 2588            | 45.2 | 9127347 | absent  |
| Chlamydia muridarum                          | 40.3 | 1072950 | present |
| Chlamydia trachomatis                        | 41.3 | 1038842 | absent  |
| Chlamydia trachomatis<br>A/HAR-13            | 41.3 | 1044459 | absent  |
| Chlamydia trachomatis<br>B/TZ1A828/OT        | 41.3 | 1044282 | absent  |
| Chlamydia trachomatis<br>D/UW-3/CX           | 41.3 | 1042519 | absent  |
| Chlamydia trachomatis                        | 41.3 | 1044352 | absent  |
| Chlamydia trachomatis<br>L2b/UCH-1/proctitis | 41.3 | 1038869 | absent  |
| Chlamydophila abortus                        | 39.9 | 1144377 | absent  |
| Chlamydophila caviae                         | 39.2 | 1173390 | present |
| Chlamydophila felis                          | 39.4 | 1166239 | present |
| Chlamydophila                                | 41.1 | 1106197 | absent  |
| Chlamydophila<br>pneumoniae AR39             | 40.6 | 1229853 | absent  |
| Chlamydophila<br>pneumoniae CWL029           | 40.6 | 1230230 | absent  |
| Chlamydophila<br>pneumoniae J138             | 40.6 | 1226565 | absent  |
| Chlamydophila<br>pneumonie TW-183            | 40.6 | 1225935 | absent  |
| Chlamydophila psittaci                       | 39.1 | 1171660 | present |
| Chlorobaculum parvum<br>NCIB 8327            | 55.8 | 2289249 | absent  |
| Chlorobium<br>chlorochromatii CaD3           | 44.3 | 2572079 | absent  |
| Chlorobium limicola                          | 51.3 | 2763181 | absent  |
| Chlorobium<br>phaeobacteroides BS1           | 48.9 | 2736403 | absent  |
| Chlorobium<br>phaeobacteroides DSM           | 48.4 | 3133902 | absent  |
| Chlorobium tepidum                           | 56.5 | 2154946 | absent  |
| Chloroflexus aggregans<br>DSM 9485           | 56.4 | 4684931 | absent  |
| Chloroflexus<br>aurantiacus J-10-fl          | 56.7 | 5258541 | absent  |
| Chloroflexus sp. Y-400-                      | 56.7 | 5268950 | absent  |
| Chloroherpeton<br>thalassium ATCC            | 45   | 3293456 | absent  |
| Chromobacterium<br>violaceum ATCC            | 64.8 | 4751080 | absent  |
| Chromohalobacter<br>salexigens DSM 3043      | 63.9 | 3696649 | absent  |
| Citrobacter koseri<br>ATCC BAA-895           | 53.8 | 4720462 | present |
| Citrobacter rodentium                        | 54.7 | 5346659 | present |

|                                                      |      |         |         |
|------------------------------------------------------|------|---------|---------|
| Clavibacter michiganensis subsp. michiganensis NCPPB | 72.7 | 3297891 | present |
| Clavibacter michiganensis subsp.                     | 72.6 | 3258645 | absent  |
| Clostridiales genomosp. BVAB3 str. UPII9-5           | 44.2 | 1810248 | absent  |
| Clostridium acetobutylicum                           | 30.9 | 3940880 | present |
| Clostridium beijerinckii NCIMB 8052                  | 29.9 | 6000632 | absent  |
| Clostridium botulinum A str. ATCC 19397              | 28.2 | 3863450 | absent  |
| Clostridium botulinum A str. ATCC 3502               | 28.2 | 3886916 | present |
| Clostridium botulinum A str. Hall                    | 28.2 | 3760560 | absent  |
| Clostridium botulinum A2 str. Kyoto                  | 28.2 | 4155278 | absent  |
| Clostridium botulinum A3 str. Loch Maree             | 28.3 | 3992906 | present |
| Clostridium botulinum B str. Eklund 17B              | 27.5 | 3800327 | present |
| Clostridium botulinum B1 str. Okra                   | 28.3 | 3958233 | present |
| Clostridium botulinum Ba4 str. 657                   | 28.2 | 3977794 | present |
| Clostridium botulinum BKT015925                      | 28.5 | 2773157 | present |
| Clostridium botulinum E3 str. Alaska E43             | 27.4 | 3659644 | absent  |
| Clostridium botulinum F str. Langeland               | 28.3 | 3995387 | present |
| Clostridium                                          | 37.4 | 4068724 | absent  |
| Clostridium                                          | 31.2 | 5262222 | absent  |
| Clostridium difficile                                | 29.1 | 4290252 | present |
| Clostridium difficile                                | 28.6 | 4110554 | absent  |
| Clostridium difficile                                | 28.8 | 4191339 | absent  |
| Clostridium kluyveri                                 | 32   | 3964618 | present |
| Clostridium kluyveri NBRC 12016                      | 32   | 3896121 | present |
| Clostridium lentocellum DSM 5427                     | 34.3 | 4714237 | absent  |
| Clostridium ljungdahlii ATCC 49587                   | 31.1 | 4630065 | absent  |
| Clostridium novyi NT                                 | 28.9 | 2547720 | absent  |
| Clostridium perfringens                              | 28.6 | 3031430 | present |
| Clostridium perfringens ATCC 13124                   | 28.4 | 3256683 | absent  |
| Clostridium perfringens                              | 28.2 | 2897393 | present |
| Clostridium phytofermentans ISDg                     | 35.3 | 4847594 | absent  |
| Clostridium saccharolyticum WM1                      | 45   | 4662871 | absent  |

|                                         |      |         |         |
|-----------------------------------------|------|---------|---------|
| Clostridium sticklandii<br>DSM 519      | 33.3 | 2715461 | absent  |
| Clostridium tetani E88                  | 28.7 | 2799251 | absent  |
| Clostridium<br>thermocellum ATCC        | 39   | 3843301 | absent  |
| Colwellia                               | 38   | 5373180 | absent  |
| Comamonas<br>testosteroni CNB-2         | 61.4 | 5373643 | absent  |
| Conexibacter woesei<br>DSM 14684        | 72.7 | 6359369 | absent  |
| Coprothermobacter<br>proteolyticus DSM  | 44.8 | 1424912 | absent  |
| Coralimargarita<br>akajimensis DSM      | 53.6 | 3750771 | absent  |
| Coriobacterium<br>glomerans PW2         | 60.4 | 2115681 | absent  |
| Corynebacterium<br>aurimucosum ATCC     | 60.6 | 2790189 | present |
| Corynebacterium                         | 53.5 | 2488635 | absent  |
| Corynebacterium<br>efficiens YS-314     | 63.1 | 3147090 | absent  |
| Corynebacterium<br>glutamicum ATCC      | 53.8 | 3282708 | absent  |
| Corynebacterium<br>glutamicum ATCC      | 53.8 | 3309401 | absent  |
| Corynebacterium<br>glutamicum R         | 54.1 | 3314179 | present |
| Corynebacterium<br>jeikeium K411        | 61.4 | 2462499 | absent  |
| Corynebacterium<br>kroppenstedtii DSM   | 57.5 | 2446804 | absent  |
| Corynebacterium<br>pseudotuberculosis   | 52.2 | 2337913 | absent  |
| Corynebacterium<br>urealyticum DSM 7109 | 64.2 | 2369219 | absent  |
| Coxiella burnetii                       | 42.7 | 1995281 | absent  |
| Coxiella burnetii                       | 42.6 | 2008870 | absent  |
| Coxiella burnetii                       | 42.7 | 2063100 | present |
| Coxiella burnetii<br>Dugway 7E9-12      | 42.4 | 2158758 | present |
| Coxiella burnetii RSA                   | 42.8 | 2016427 | present |
| Croceibacter atlanticus<br>HTCC2559     | 33.9 | 2952962 | absent  |
| Cronobacter turicensis                  | 57.4 | 4384526 | present |
| Cryptobacterium<br>curtum DSM 15641     | 50.9 | 1617804 | absent  |
| Cupriavidus                             | 67.5 | 3416911 | present |
| Cupriavidus<br>taiwanensis              | 67.9 | 2502411 | present |
| Cyanobacterium                          | 31.1 | 1443806 | absent  |
| Cyanothece sp. ATCC<br>51142 chromosome | 37.9 | 4934271 | present |
| Cyanothece sp. ATCC<br>51142 chromosome | 38.6 | 429701  | present |

|                                         |      |         |         |
|-----------------------------------------|------|---------|---------|
| Cyanothece sp. PCC                      | 38.6 | 5942652 | present |
| Cyanothece sp. PCC                      | 50.8 | 5374574 | present |
| Cyanothece sp. PCC                      | 40.2 | 6091620 | present |
| Cyanothece sp. PCC                      | 39.8 | 4679413 | present |
| Cyanothece sp. PCC                      | 39.8 | 4669813 | present |
| Cytophaga hutchinsonii<br>ATCC 33406    | 38.8 | 4433218 | absent  |
| Dechloromonas<br>aromatica RCB          | 59.2 | 4501104 | absent  |
| Deferribacter<br>desulfuricans SSM1     | 31.1 | 2234389 | present |
| Dehalococcoides<br>ethenogenes 195      | 48.9 | 1469720 | absent  |
| Dehalococcoides sp.                     | 47.2 | 1341892 | absent  |
| Dehalococcoides sp.                     | 47   | 1395502 | absent  |
| Dehalococcoides sp.                     | 47.3 | 1360154 | absent  |
| Dehalococcoides sp. VS                  | 47.3 | 1413462 | absent  |
| Dehalogenimonas<br>lykanthroporepellens | 55   | 1686510 | absent  |
| Deinococcus deserti                     | 63.4 | 2819842 | present |
| Deinococcus<br>geothermalis DSM         | 66.6 | 2467205 | absent  |
| Deinococcus<br>maricopensis DSM         | 69.8 | 3498530 | absent  |
| Deinococcus<br>proteolyticus MRP        | 66.2 | 2147060 | present |
| Deinococcus                             | 67   | 2648638 | present |
| Deinococcus<br>radiodurans R1           | 66.7 | 412348  | present |
| Delftia acidovorans                     | 66.5 | 6767514 | absent  |
| Delftia sp. Cs1-4                       | 66.7 | 6685842 | absent  |
| Denitrovibrio<br>acetiphilus DSM 12809  | 42.5 | 3222077 | absent  |
| Desulfarculus baarsii<br>DSM 2075       | 65.7 | 3655731 | absent  |
| Desulfatibacillum<br>alkenivorans AK-01 | 54.5 | 6517073 | absent  |
| Desulfitobacterium<br>hafniense DCB-2   | 47.5 | 5279134 | absent  |
| Desulfitobacterium<br>hafniense Y51     | 47.4 | 5727534 | absent  |
| Desulfobacca<br>acetoxidans DSM         | 52.9 | 3282536 | absent  |
| Desulfobacterium<br>autotrophicum HRM2  | 48.8 | 5589073 | present |
| Desulfobulbus<br>propionicus DSM 2032   | 58.9 | 3851869 | absent  |
| Desulfobalobium<br>retbaense DSM 5692   | 57.5 | 2864304 | present |
| Desulfomicrobium<br>baculatum DSM 4028  | 58.6 | 3942657 | absent  |
| Desulfotalea<br>psychrophila LSV54      | 46.8 | 3523383 | present |

|                                                            |      |         |         |
|------------------------------------------------------------|------|---------|---------|
| Desulfotomaculum acetoxidans DSM 771                       | 41.6 | 4545624 | absent  |
| Desulfotomaculum carboxydivorans CO-1-                     | 46.6 | 2892255 | absent  |
| Desulfotomaculum kuznetsovii DSM 6115                      | 54.9 | 3601386 | absent  |
| Desulfotomaculum reducens MI-1                             | 42.3 | 3608104 | absent  |
| Desulfotomaculum ruminis DSM 2154                          | 47.2 | 3969014 | absent  |
| Desulfovibrio aespoeensis Aspo-2                           | 62.6 | 3629109 | absent  |
| Desulfovibrio desulfuricans G20                            | 57.8 | 3730232 | absent  |
| Desulfovibrio desulfuricans subsp. desulfuricans str. ATCC | 58.1 | 2873437 | absent  |
| Desulfovibrio salexigens DSM 2638                          | 62.8 | 5248049 | present |
| Desulfovibrio salexigens DSM 2638                          | 47.1 | 4289847 | absent  |
| Desulfovibrio vulgaris str. Miyazaki F                     | 67.1 | 4040304 | absent  |
| Desulfovibrio vulgaris subsp. vulgaris DP4                 | 63   | 3462887 | present |
| Desulfovibrio vulgaris subsp. vulgaris str.                | 63.1 | 3570858 | present |
| Desulfurispirillum                                         | 56.1 | 2928377 | absent  |
| Desulfurivibrio alkaliphilus AHT2                          | 60.3 | 3097763 | absent  |
| Desulfurobacterium thermolithotrophum DSM 11699            | 34.9 | 1541968 | absent  |
| Diaphorobacter sp.                                         | 66.8 | 3796573 | absent  |
| Dichelobacter nodosus VCS1703A                             | 44.4 | 1389350 | absent  |
| Dickeya dadantii 3937                                      | 56.3 | 4922802 | absent  |
| Dickeya dadantii                                           | 53.6 | 4818394 | absent  |
| Dickeya dadantii                                           | 55   | 4679450 | absent  |
| Dickeya zeae Ech1591                                       | 54.5 | 4813854 | absent  |
| Dictyoglomus thermophilum H-6-12                           | 33.7 | 1959987 | absent  |
| Dictyoglomus turgidum DSM 6724                             | 34   | 1855560 | absent  |
| Dinoroseobacter shibae DFL 12                              | 66   | 3789584 | present |
| Dyadobacter fermentans DSM 18053                           | 51.5 | 6967790 | absent  |
| Edwardsiella ictaluri                                      | 57.4 | 3812315 | absent  |
| Edwardsiella tarda                                         | 59.7 | 3760463 | present |
| Eggerthella lenta DSM                                      | 64.2 | 3632260 | absent  |
| Ehrlichia canis str. Jake                                  | 29   | 1315030 | absent  |
| Ehrlichia chaffeensis str. Arkansas                        | 30.1 | 1176248 | absent  |



|                                             |      |         |         |
|---------------------------------------------|------|---------|---------|
| Ehrlichia ruminantium<br>str. Gardel        | 27.5 | 1499920 | absent  |
| Ehrlichia ruminantium<br>str. Welgevonden   | 27.5 | 1512977 | absent  |
| Ehrlichia ruminantium<br>str. Welgevonden   | 27.5 | 1516355 | absent  |
| Elusimicrobium<br>minutum Pei191            | 40   | 1643562 | absent  |
| Enterobacter aerogenes<br>KCTC 2190         | 54.8 | 5280350 | absent  |
| Enterobacter cloacae                        | 57   | 4814049 | absent  |
| Enterobacter cloacae<br>subsp. cloacae ATCC | 54.8 | 5314581 | present |
| Enterobacter sakazakii<br>ATCC BAA-894      | 56.8 | 4368373 | present |
| Enterobacter sp. 638                        | 53   | 4518712 | present |
| Enterococcus faecalis                       | 37.5 | 3218031 | absent  |
| Erwinia amylovora                           | 53.6 | 3805573 | absent  |
| Erwinia amylovora<br>ATCC 49946             | 53.6 | 3805874 | present |
| Erwinia billingiae                          | 55.2 | 5100167 | present |
| Erwinia carotovora<br>subsp. atroseptica    | 51   | 5064019 | absent  |
| Erwinia pyrifoliae                          | 53.4 | 4026322 | present |
| Erwinia tasmaniensis                        | 53.7 | 3883467 | present |
| Erysipelothrix<br>rhusiopathiae str.        | 36.6 | 1787941 | absent  |
| Erythrobacter litoralis<br>HTCC2594         | 63.1 | 3052398 | absent  |
| Escherichia coli<br>0127:H6 E2348/69        | 50.6 | 4965553 | present |
| Escherichia coli 536                        | 50.5 | 4938920 | absent  |
| Escherichia coli 55989                      | 50.7 | 5154862 | absent  |
| Escherichia coli APEC                       | 50.5 | 5082025 | absent  |
| Escherichia coli ATCC                       | 50.9 | 4746218 | absent  |
| Escherichia coli B str.                     | 50.8 | 4629812 | absent  |
| Escherichia coli                            | 50.8 | 4570938 | absent  |
| Escherichia coli                            | 50.8 | 4578159 | absent  |
| Escherichia coli                            | 50.5 | 5231428 | absent  |
| Escherichia coli                            | 50.6 | 4979619 | present |
| Escherichia coli ED1a                       | 50.7 | 5209548 | absent  |
| Escherichia coli HS                         | 50.8 | 4643538 | absent  |
| Escherichia coli IAI1                       | 50.8 | 4700560 | absent  |
| Escherichia coli IAI39                      | 50.6 | 5132068 | absent  |
| Escherichia coli K-12<br>substr. W3110      | 50.8 | 4646332 | absent  |
| Escherichia coli<br>O103:H2 str. 12009      | 50.7 | 5449314 | present |
| Escherichia coli<br>O111:H- str. 11128      | 50.6 | 5371077 | present |
| Escherichia coli                            | 50.5 | 5498450 | present |
| Escherichia coli<br>O157:H7 EDL933          | 50.4 | 5528445 | absent  |

|                                                 |      |         |         |
|-------------------------------------------------|------|---------|---------|
| Escherichia coli<br>O157:H7 str. EC4115         | 50.5 | 5572075 | present |
| Escherichia coli<br>O157:H7 str. TW14359        | 50.5 | 5528136 | present |
| Escherichia coli<br>O26:H11 str. 11368          | 50.7 | 5697240 | present |
| Escherichia coli<br>O55:H7 str. CB9615          | 50.5 | 5386352 | present |
| Escherichia coli S88                            | 50.7 | 5032268 | absent  |
| Escherichia coli SE11                           | 50.8 | 4887515 | present |
| Escherichia coli SMS-                           | 50.5 | 5068389 | present |
| Escherichia coli str. K-<br>12 substr. DH10B    | 50.8 | 4686137 | absent  |
| Escherichia coli str. K-<br>12 substr. MG1655   | 50.8 | 4639675 | absent  |
| Escherichia coli                                | 50.7 | 5202090 | absent  |
| Escherichia coli UTI89                          | 50.6 | 5065741 | present |
| Escherichia fergusonii<br>ATCC 35469            | 49.9 | 4588711 | absent  |
| Ethanoligenens<br>harbinense YUAN-3             | 55.6 | 3008576 | absent  |
| Eubacterium eligens<br>ATCC 27750               | 37.7 | 2144190 | present |
| Eubacterium limosum                             | 47.5 | 4276902 | absent  |
| Eubacterium rectale<br>ATCC 33656               | 41.5 | 3449685 | absent  |
| Exiguobacterium<br>sibiricum 255-15             | 47.7 | 3034136 | present |
| Exiguobacterium sp.                             | 48.5 | 2999895 | absent  |
| Ferrimonas balearica<br>DSM 9799                | 60.2 | 4279159 | absent  |
| Fervidobacterium<br>nodosum Rt17-B1             | 35   | 1948941 | absent  |
| Fibrobacter<br>succinogenes subsp.              | 48.1 | 3842635 | absent  |
| Finegoldia magna                                | 32.3 | 1797577 | present |
| Flavobacteriaceae<br>bacterium 3519-10          | 42.7 | 2768102 | absent  |
| Flavobacteriales<br>bacterium HTCC2170          | 37   | 3868304 | absent  |
| Flavobacterium<br>johnsoniae UW101              | 34.1 | 6096872 | absent  |
| Flavobacterium<br>psychrophilum JIP02/86        | 32.5 | 2861988 | absent  |
| Fluviicola taffensis                            | 36.5 | 4633577 | absent  |
| Francisella philomiragia<br>subsp. philomiragia | 32.6 | 2045775 | present |
| Francisella tularensis<br>subsp. holarctica     | 32.2 | 1895994 | absent  |
| Francisella tularensis<br>subsp. holarctica     | 32.2 | 1890909 | absent  |
| Francisella tularensis<br>subsp. holarctica     | 32.2 | 1895727 | absent  |

|                                                   |      |         |         |
|---------------------------------------------------|------|---------|---------|
| Francisella tularensis<br>subsp. mediasiatica     | 32.3 | 1893886 | absent  |
| Francisella tularensis<br>subsp. novicida U112    | 32.5 | 1910031 | absent  |
| Francisella tularensis<br>subsp. tularensis FSC   | 32.3 | 1892616 | absent  |
| Francisella tularensis<br>subsp. tularensis Schu4 | 32.3 | 1892775 | absent  |
| Francisella tularensis<br>subsp. tularensis       | 32.3 | 1898476 | absent  |
| Frankia alni ACN14a                               | 72.8 | 7497934 | absent  |
| Frankia sp. CcI3                                  | 70.1 | 5433628 | absent  |
| Frankia sp. EAN1pec                               | 71.2 | 8982042 | absent  |
| Frankia sp. EuI1c                                 | 72.3 | 8815781 | absent  |
| Frankia symbiont of<br>Datisca glomerata          | 70   | 5323186 | present |
| Fusobacterium<br>nucleatum subsp.                 | 27.2 | 2174500 | absent  |
| Gallibacterium anatis                             | 39.9 | 2687335 | present |
| Gallionella<br>capsiferriformans ES-2             | 52.8 | 3162471 | absent  |
| Gamma                                             | 53.3 | 4587455 | absent  |
| Gardnerella vaginalis                             | 42   | 1617545 | absent  |
| Gardnerella vaginalis<br>ATCC 14019               | 41.4 | 1667350 | absent  |
| Gemmatimonas<br>aurantiaca T-27                   | 64.3 | 4636964 | absent  |
| Geobacillus<br>kaustophilus HTA426                | 52.1 | 3544776 | present |
| Geobacillus sp. C56-T3                            | 52.5 | 3650813 | absent  |
| Geobacillus sp. WCH70                             | 42.8 | 3464618 | present |
| Geobacillus sp.                                   | 44   | 3840330 | present |
| Geobacillus sp.                                   | 51.2 | 7121665 | absent  |
| Geobacillus sp.                                   | 52.4 | 3628883 | present |
| Geobacillus sp.                                   | 52.4 | 3622844 | present |
| Geobacillus<br>thermodenitrificans                | 49   | 3550319 | present |
| Geobacter bemidjensis                             | 60.3 | 4615150 | absent  |
| Geobacter lovleyi SZ                              | 54.8 | 3917761 | present |
| Geobacter<br>metallireducens GS-15                | 59.5 | 3997420 | present |
| Geobacter sp. FRC-32                              | 53.5 | 4304501 | absent  |
| Geobacter sp. M18                                 | 61.2 | 5277406 | absent  |
| Geobacter sp. M21                                 | 60.5 | 4745806 | absent  |
| Geobacter                                         | 60.9 | 3814139 | absent  |
| Geobacter<br>uraniumreducens Rf4                  | 54.2 | 5136364 | absent  |
| Geodermatophilus<br>obscurus DSM 43160            | 74   | 5322497 | absent  |
| Glaciecola sp. 4H-3-                              | 44.2 | 5052309 | present |
| Gloeobacter violaceus                             | 62   | 4659019 | absent  |
| Gluconacetobacter<br>diazotrophicus PAI 5         | 66.4 | 3944163 | present |

|                                        |      |         |         |
|----------------------------------------|------|---------|---------|
| Gluconacetobacter diazotrophicus PA1 5 | 66.4 | 3887492 | present |
| Gluconobacter oxydans                  | 61.1 | 2702173 | present |
| Gordonia bronchialis DSM 43247         | 67.1 | 5208602 | present |
| Gramella forsetii                      | 36.6 | 3798465 | absent  |
| Granulobacter bethesdensis CGDNIH1     | 59.1 | 2708355 | absent  |
| Haemophilus ducreyi                    | 38.2 | 1698955 | absent  |
| Haemophilus influenzae 86-028NP        | 38.2 | 1914490 | absent  |
| Haemophilus influenzae                 | 38.2 | 1985832 | absent  |
| Haemophilus influenzae                 | 38.2 | 2007018 | absent  |
| Haemophilus influenzae                 | 38   | 1813033 | absent  |
| Haemophilus influenzae                 | 38   | 1887192 | absent  |
| Haemophilus influenzae                 | 38.2 | 1830138 | absent  |
| Haemophilus parasuis                   | 40   | 2269156 | absent  |
| Haemophilus somnus                     | 37.2 | 2007700 | present |
| Haemophilus somnus                     | 37.4 | 2263857 | absent  |
| Hahella chejuensis                     | 53.9 | 7215267 | absent  |
| Halanaerobium sp.                      | 33.2 | 2613117 | absent  |
| Haliangium ochraceum DSM 14365         | 69.5 | 9446314 | absent  |
| Haliscomenobacter hydrossis DSM 1100   | 47.1 | 8371686 | present |
| Halomonas elongata DSM 2581            | 63.6 | 4061296 | absent  |
| Halorhodospira                         | 68   | 2678452 | absent  |
| Halothermothrix orenii                 | 37.9 | 2578146 | absent  |
| Halothiobacillus neapolitanus c2       | 54.7 | 2582886 | absent  |
| Helicobacter acinonychis str. Sheeba   | 38.2 | 1553927 | present |
| Helicobacter felis ATCC 49179          | 44.5 | 1654761 | absent  |
| Helicobacter hepaticus ATCC 51449      | 35.9 | 1799146 | absent  |
| Helicobacter mustelae                  | 42.5 | 1578097 | absent  |
| Helicobacter pylori                    | 38.9 | 1667867 | absent  |
| Helicobacter pylori B38                | 39.2 | 1576758 | absent  |
| Helicobacter pylori B8                 | 38.8 | 1673997 | present |
| Helicobacter pylori G27                | 38.9 | 1652982 | present |
| Helicobacter pylori                    | 39.1 | 1596366 | present |
| Helicobacter pylori P12                | 38.8 | 1673813 | present |
| Helicobacter pylori                    | 38.9 | 1629557 | present |
| Helicobacter pylori                    | 38.9 | 1608548 | absent  |
| Helicobacter pylori                    | 38.9 | 1658051 | absent  |
| Helicobacter pylori,                   | 39.2 | 1643831 | absent  |
| Heliobacterium modesticaldum Ice1      | 57   | 3075407 | absent  |
| Herbaspirillum seropedicae SmR1        | 63.4 | 5513887 | absent  |
| Herminiimonas                          | 54.3 | 3424307 | absent  |

|                                            |      |         |         |
|--------------------------------------------|------|---------|---------|
| Herpetosiphon<br>aurantiacus ATCC          | 50.7 | 6346587 | present |
| Hippea maritima DSM                        | 37.5 | 1694430 | absent  |
| Hirschia baltica ATCC                      | 45.2 | 3455622 | present |
| Hydrogenobacter<br>thermophilus TK-6       | 44   | 1743135 | absent  |
| Hydrogenobaculum sp.<br>Y04AAS1            | 34.8 | 1559514 | absent  |
| Hyphomicrobium<br>denitrificans ATCC       | 60.8 | 3638969 | absent  |
| Hyphomonas<br>neptunium ATCC               | 61.9 | 3705021 | absent  |
| Idiomarina loihiensis                      | 47   | 2839318 | absent  |
| Ilyobacter polytropus<br>DSM 2926          | 34.5 | 2046464 | present |
| Intrasporangium calvum<br>DSM 43043        | 70.7 | 4024382 | absent  |
| Isoptericola variabilis                    | 73.9 | 3307740 | absent  |
| Isosphaera pallida<br>ATCC 43644           | 62.4 | 5472964 | present |
| Jannaschia sp. CCS1                        | 62.3 | 4317977 | present |
| Janthinobacterium sp.                      | 54.2 | 4110251 | absent  |
| Jonesia denitrificans<br>DSM 20603         | 58.4 | 2749646 | absent  |
| Kangiella koreensis<br>DSM 16069           | 43.7 | 2852073 | absent  |
| Ketogulonicigenium<br>vulgare Y25          | 61.7 | 2776084 | present |
| Kineococcus<br>radiotolerans SRS30216      | 74.4 | 4761183 | present |
| Klebsiella pneumoniae                      | 57.3 | 5641239 | present |
| Klebsiella pneumoniae<br>NTUH-K2044        | 57.7 | 5248520 | absent  |
| Klebsiella pneumoniae<br>subsp. pneumoniae | 57.5 | 5315120 | present |
| Klebsiella variicola At-                   | 57.6 | 5458505 | absent  |
| Kocuria rhizophila                         | 71.2 | 2697540 | absent  |
| Kosmotoga olearia TBF                      | 41.5 | 2302126 | absent  |
| Kribbella flavida DSM                      | 70.6 | 7579488 | absent  |
| Krokinobacter sp. 4H-3-                    | 37.3 | 3389993 | absent  |
| Kytococcus sedentarius<br>DSM 20547        | 71.6 | 2785024 | absent  |
| Lacinutrix sp. 5H-3-7-4                    | 30.8 | 3296168 | absent  |
| Lactobacillus                              | 38.1 | 2078001 | present |
| Lactobacillus<br>acidophilus NCFM          | 34.7 | 1993560 | absent  |
| Lactobacillus<br>amylovorus GRL 1112       | 38.2 | 2067702 | absent  |
| Lactobacillus brevis                       | 46.2 | 2291220 | present |
| Lactobacillus buchneri<br>NRRL B-30929     | 44.4 | 2506301 | present |
| Lactobacillus casei                        | 46.6 | 2895264 | present |
| Lactobacillus casei                        | 46.3 | 3079196 | absent  |
| Lactobacillus casei str.                   | 46.5 | 2861848 | absent  |

|                                                 |      |         |         |
|-------------------------------------------------|------|---------|---------|
| Lactobacillus crispatus                         | 36.9 | 2043161 | absent  |
| Lactobacillus delbrueckii subsp.                | 49.7 | 1864998 | absent  |
| Lactobacillus delbrueckii subsp.                | 49.7 | 1856951 | absent  |
| Lactobacillus delbrueckii subsp.                | 49.6 | 2125753 | present |
| Lactobacillus fermentum IFO 3956                | 51.5 | 2098685 | absent  |
| Lactobacillus gasseri ATCC 33323                | 35.3 | 1894360 | absent  |
| Lactobacillus helveticus DPC 4571               | 37.1 | 2080931 | absent  |
| Lactobacillus johnsonii                         | 34.5 | 1755993 | present |
| Lactobacillus johnsonii NCC 533                 | 34.6 | 1992676 | absent  |
| Lactobacillus kefiranofaciens ZW3               | 37.7 | 2113023 | present |
| Lactobacillus plantarum                         | 44.5 | 3308274 | absent  |
| Lactobacillus plantarum                         | 44.7 | 3197759 | absent  |
| Lactobacillus plantarum subsp. plantarum ST-III | 44.6 | 3254376 | present |
| Lactobacillus reuteri DSM 20016                 | 38.9 | 1999618 | absent  |
| Lactobacillus reuteri F275 Kitasato             | 38.9 | 2039414 | absent  |
| Lactobacillus rhamnosus Lc 705                  | 46.7 | 3010111 | absent  |
| Lactobacillus sakei subsp. sakei 23K            | 46.7 | 2968598 | present |
| Lactobacillus sakei subsp. sakei 23K            | 41.3 | 1884661 | absent  |
| Lactobacillus salivarius subsp. salivarius      | 32.9 | 1827111 | present |
| Lactococcus lactis subsp. cremoris              | 35.7 | 2529478 | absent  |
| Lactococcus lactis subsp. cremoris SK11         | 35.9 | 2438589 | present |
| Lactococcus lactis                              | 35.3 | 2365589 | absent  |
| Lactococcus lactis subsp. lactis KF147          | 34.9 | 2598144 | present |
| Laribacter hongkongensis HLHK9                  | 62.4 | 3169329 | absent  |
| Lawsonia intracellularis PHE/MN1-00             | 33.3 | 1457619 | present |
| Leadbetterella byssophila DSM 17132             | 40.4 | 4059653 | absent  |
| Legionella longbeachae NSW150                   | 37.1 | 4077332 | absent  |
| Legionella pneumophila 2300/99 Alcoy            | 38.4 | 3516334 | absent  |
| Legionella pneumophila str. Corby               | 38.5 | 3576470 | absent  |
| Legionella pneumophila str. Lens                | 38.4 | 3345687 | present |

|                                                                |      |         |         |
|----------------------------------------------------------------|------|---------|---------|
| Legionella pneumophila str. Paris                              | 38.4 | 3503610 | present |
| Legionella pneumophila subsp. pneumophila str.                 | 38.3 | 3397754 | absent  |
| Leifsonia xyli subsp. xyli str. CTCB07                         | 67.7 | 2584158 | absent  |
| Leptospira biflexa serovar Patoc strain                        | 38.9 | 3603977 | present |
| Leptospira biflexa serovar Patoc strain Patoc 1 (Ames)         | 39.3 | 277995  | present |
| Leptospira biflexa serovar Patoc strain                        | 38.9 | 3599677 | present |
| Leptospira biflexa serovar Patoc strain Patoc 1 (Paris)        | 39.3 | 277655  | present |
| Leptospira borgpetersenii serovar                              | 40.2 | 3576473 | absent  |
| Leptospira borgpetersenii serovar Hardjo-bovis JB197           | 40.4 | 299762  | absent  |
| Leptospira borgpetersenii serovar                              | 40.2 | 3614446 | absent  |
| Leptospira borgpetersenii serovar Hardjo-bovis L550            | 40.2 | 317336  | absent  |
| Leptospira interrogans serovar Copenhageni str. Fiocruz L1-130 | 35   | 4277185 | absent  |
| Leptospira interrogans serovar Copenhageni str. Fiocruz L1-130 | 35   | 350181  | absent  |
| Leptospira interrogans serovar lai str. 56601                  | 35   | 4332241 | absent  |
| Leptospira interrogans serovar lai str. 56601                  | 35.1 | 358943  | absent  |
| Leptothrix cholodnii                                           | 68.9 | 4909403 | absent  |
| Leptotrichia buccalis DSM 1135                                 | 29.6 | 2465610 | absent  |
| Leuconostoc citreum                                            | 39   | 1796284 | present |
| Leuconostoc gasicomitatum LMG                                  | 36.7 | 1954080 | absent  |
| Leuconostoc kimchii IMSNU11154                                 | 38   | 2002721 | present |
| Leuconostoc mesenteroides subsp. mesenteroides ATCC            | 37.7 | 2038396 | present |
| Listeria innocua                                               | 37.4 | 3011208 | present |
| Listeria monocytogenes 08-5578                                 | 38   | 3032288 | absent  |
| Listeria monocytogenes 08-5923                                 | 38   | 2999054 | absent  |
| Listeria monocytogenes Clip81459                               | 38.1 | 2912690 | absent  |

|                                        |      |         |         |
|----------------------------------------|------|---------|---------|
| Listeria monocytogenes HCC23           | 38.2 | 2976212 | absent  |
| Listeria monocytogenes str. 4b F2365   | 38   | 2905187 | absent  |
| Listeria monocytogenes strain EGD      | 38   | 2944528 | absent  |
| Listeria seeligeri serovar 1/2b str.   | 37.4 | 2797636 | absent  |
| Listeria welshimeri serovar 6b str.    | 36.4 | 2814130 | absent  |
| Lysinibacillus                         | 37.3 | 4639821 | present |
| Macrococcus caseolyticus JCSC5402      | 36.9 | 2102324 | present |
| Magnetococcus sp. MC-                  | 54.2 | 4719581 | absent  |
| Magnetospirillum magneticum AMB-1      | 65.1 | 4967148 | absent  |
| Mahella australiensis 50-1 BON         | 43.5 | 3135972 | absent  |
| Mannheimia succiniciproducens          | 42.5 | 2314078 | absent  |
| Maricaulis maris                       | 62.7 | 3368780 | absent  |
| Marinithermus hydrothermalis DSM       | 68.1 | 2269167 | absent  |
| Marinobacter aquaeolei                 | 57.3 | 4326849 | present |
| Marinomonas mediterranea MMB-1         | 44.1 | 4684316 | absent  |
| Marinomonas posidonica IVIA-Po-        | 44.3 | 3899940 | absent  |
| Marinomonas sp.                        | 42.6 | 5100344 | absent  |
| Marivirga tractuosa                    | 35.5 | 4511574 | present |
| Meiothermus ruber                      | 63.4 | 3097457 | absent  |
| Meiothermus silvanus DSM 9946          | 62.4 | 3249394 | present |
| Melissococcus plutonius ATCC 35311     | 31.4 | 1891014 | present |
| Mesoplasma florum L1                   | 27   | 793224  | absent  |
| Mesorhizobium ciceri biovar biserrulae | 62.7 | 6264489 | present |
| Mesorhizobium loti MAFF303099          | 62.7 | 7036071 | present |
| Mesorhizobium sp.                      | 61.1 | 4412446 | present |
| Methylacidiphilum infernorum V4        | 45.5 | 2287145 | absent  |
| Methylibium petroleiphilum PM1         | 69.2 | 4044195 | present |
| Methylobacillus                        | 55.7 | 2971517 | absent  |
| Methylobacterium chloromethanicum CM4  | 68.2 | 5777908 | present |
| Methylobacterium extorquens AM1        | 68.7 | 5511322 | present |
| Methylobacterium extorquens DM4        | 68.1 | 5943768 | present |
| Methylobacterium extorquens PA1        | 68.2 | 5471154 | absent  |



|                                             |      |         |         |
|---------------------------------------------|------|---------|---------|
| Methylobacterium nodulans ORS 2060          | 68.9 | 7772460 | present |
| Methylobacterium                            | 69.4 | 5800441 | present |
| Methylobacterium radiotolerans JCM 2831     | 71.5 | 6077833 | present |
| Methylobacterium sp.                        | 71.6 | 7659055 | present |
| Methylocella silvestris                     | 63.1 | 4305430 | absent  |
| Methylococcus capsulatus str. Bath          | 63.6 | 3304561 | absent  |
| Methylomonas methanica MC09                 | 51.3 | 5051681 | absent  |
| Methylotenera mobilis                       | 45.5 | 2547570 | absent  |
| Methylotenera sp. 301                       | 42.6 | 3059871 | absent  |
| Methylovorus sp.                            | 55.4 | 2862391 | absent  |
| Methylovorus sp. SIP3-                      | 54.9 | 2995511 | present |
| Microbacterium testaceum StLB037            | 70.3 | 3982034 | absent  |
| Micrococcus luteus NCTC 2665                | 73   | 2501097 | absent  |
| Microcystis aeruginosa NIES-843             | 42.3 | 5842795 | absent  |
| Microlunatus phosphovorus NM-1              | 67.3 | 5683123 | absent  |
| Micromonospora aurantiaca ATCC 27029        | 72.8 | 7025559 | absent  |
| Micromonospora sp. L5                       | 72.8 | 6962533 | absent  |
| Mobiluncus curtisii ATCC 43063              | 55.4 | 2146480 | absent  |
| Moorella thermoacetica ATCC 39073           | 55.8 | 2628784 | absent  |
| Moraxella catarrhalis                       | 41.7 | 1863286 | absent  |
| Mycobacterium abscessus ATCC                | 64.1 | 5067172 | absent  |
| Mycobacterium avium                         | 69   | 5475491 | absent  |
| Mycobacterium avium subsp. paratuberculosis | 69.3 | 4829781 | absent  |
| Mycobacterium bovis BCG str. Pasteur        | 65.6 | 4374522 | absent  |
| Mycobacterium bovis BCG str. Tokyo 172      | 65.6 | 4371711 | absent  |
| Mycobacterium bovis subsp. bovis AF2122/97  | 65.6 | 4345492 | absent  |
| Mycobacterium gilvum PYR-GCK                | 67.9 | 5619607 | present |
| Mycobacterium leprae                        | 57.8 | 3268071 | absent  |
| Mycobacterium leprae strain TN              | 57.8 | 3268203 | absent  |
| Mycobacterium                               | 65.7 | 6636827 | present |
| Mycobacterium smegmatis str. MC2            | 67.4 | 6988209 | absent  |
| Mycobacterium sp.                           | 68.4 | 4643668 | absent  |
| Mycobacterium sp. JLS                       | 68.4 | 6048425 | absent  |
| Mycobacterium sp.                           | 68.4 | 5737227 | present |
| Mycobacterium sp.                           | 68.5 | 5705448 | present |

|                                        |      |         |         |
|----------------------------------------|------|---------|---------|
| Mycobacterium sp.                      | 67.9 | 5547747 | present |
| Mycobacterium tuberculosis CDC1551     | 65.6 | 4403837 | absent  |
| Mycobacterium tuberculosis F11         | 65.6 | 4424435 | absent  |
| Mycobacterium tuberculosis H37Ra       | 65.6 | 4419977 | absent  |
| Mycobacterium tuberculosis H37Rv       | 65.6 | 4411532 | absent  |
| Mycobacterium tuberculosis KZN 1435    | 65.6 | 4398250 | absent  |
| Mycobacterium ulcerans Agy99           | 65.5 | 5631606 | absent  |
| Mycobacterium vanbaalenii PYR-1        | 67.8 | 6491865 | absent  |
| Mycoplasma agalactiae                  | 29.6 | 1006702 | absent  |
| Mycoplasma agalactiae                  | 29.7 | 877438  | absent  |
| Mycoplasma arthritidis 158L3-1         | 30.7 | 820453  | absent  |
| Mycoplasma bovis                       | 29.3 | 1003404 | absent  |
| Mycoplasma capricolum subsp.           | 23.8 | 1010023 | absent  |
| Mycoplasma                             | 28.5 | 846214  | absent  |
| Mycoplasma crocodyli                   | 27   | 934379  | absent  |
| Mycoplasma                             | 26.9 | 977524  | absent  |
| Mycoplasma                             | 26.9 | 1118751 | absent  |
| Mycoplasma                             | 31.5 | 996422  | absent  |
| Mycoplasma genitalium                  | 31.7 | 580076  | absent  |
| Mycoplasma haemofelis str. Langford 1  | 38.9 | 1147259 | absent  |
| Mycoplasma hominis                     | 27.1 | 665445  | absent  |
| Mycoplasma hyopneumoniae 232           | 28.6 | 892758  | absent  |
| Mycoplasma hyopneumoniae 7448          | 28.5 | 920079  | absent  |
| Mycoplasma                             | 28.5 | 897405  | absent  |
| Mycoplasma hyorhinitis                 | 25.9 | 839615  | absent  |
| Mycoplasma leachii                     | 23.8 | 1008951 | absent  |
| Mycoplasma mobile                      | 25   | 777079  | absent  |
| Mycoplasma mycoides subsp. mycoides SC | 24   | 1211703 | absent  |
| Mycoplasma penetrans                   | 25.7 | 1358633 | absent  |
| Mycoplasma                             | 40   | 816394  | absent  |
| Mycoplasma pulmonis                    | 26.6 | 963879  | absent  |
| Mycoplasma suis                        | 31.1 | 709270  | absent  |
| Mycoplasma suis str.                   | 31.1 | 742431  | absent  |
| Mycoplasma synoviae                    | 28.5 | 799476  | absent  |
| Myxococcus xanthus                     | 68.9 | 9139763 | absent  |
| Nakamurella multipartita DSM           | 70.9 | 6060298 | absent  |
| Natranaerobius thermophilus JW-NM-     | 36.3 | 3165557 | present |
| Nautilia profundicola                  | 33.5 | 1676444 | absent  |

|                                              |      |         |         |
|----------------------------------------------|------|---------|---------|
| Neisseria gonorrhoeae<br>FA 1090             | 52.7 | 2153922 | absent  |
| Neisseria gonorrhoeae<br>NCCP11945           | 52.4 | 2232025 | present |
| Neisseria lactamica ST-                      | 52.3 | 2220606 | absent  |
| Neisseria meningitidis                       | 51.7 | 2153416 | absent  |
| Neisseria meningitidis                       | 51.9 | 2145295 | absent  |
| Neisseria meningitidis                       | 51.6 | 2194961 | absent  |
| Neisseria meningitidis<br>serogroup A strain | 51.8 | 2184406 | absent  |
| Neisseria meningitidis<br>serogroup B strain | 51.5 | 2272360 | absent  |
| Neorickettsia risticii str.                  | 41.3 | 879977  | absent  |
| Neorickettsia sennetsu<br>str. Miyayama      | 41.1 | 859006  | absent  |
| Nitratifactor salsuginis<br>DSM 16511        | 53.9 | 2101285 | absent  |
| Nitratiruptor sp. SB155-                     | 39.7 | 1877931 | absent  |
| Nitrobacter                                  | 61.7 | 4406967 | present |
| Nitrobacter<br>winogradskyi Nb-255           | 62   | 3402093 | absent  |
| Nitrosococcus                                | 51.6 | 4079427 | present |
| Nitrosococcus oceani<br>ATCC 19707           | 50.3 | 3481691 | present |
| Nitrosococcus watsoni                        | 50.1 | 3328570 | present |
| Nitrosomonas europaea<br>ATCC 19718          | 50.7 | 2812094 | absent  |
| Nitrosomonas eutropha                        | 48.5 | 2661057 | present |
| Nitrosomonas sp.                             | 44.8 | 3180526 | present |
| Nitrospira<br>multiformis ATCC               | 53.9 | 3184243 | present |
| Nocardia farcinica                           | 70.8 | 6021225 | present |
| Nocardioides sp. JS614                       | 71.7 | 4985871 | present |
| Nocardiopsis<br>dassonvillei subsp.          | 72.8 | 5767958 | present |
| 'Nostoc azollae' 0708                        | 38.4 | 5354700 | present |
| Nostoc punctiforme<br>PCC 73102              | 41.4 | 8234322 | present |
| Nostoc sp. PCC 7120                          | 41.3 | 6413771 | present |
| Novosphingobium<br>aromaticivorans DSM       | 65.2 | 3561584 | absent  |
| Novosphingobium sp.                          | 63.7 | 3911486 | present |
| Oceanithermus<br>profundus DSM 14977         | 70   | 2303940 | present |
| Oceanobacillus                               | 35.7 | 3630528 | absent  |
| Ochrobactrum anthropi<br>ATCC 49188          | 56.1 | 2887297 | present |
| Ochrobactrum anthropi<br>ATCC 49188          | 56.2 | 1895911 | present |
| Odoribacter<br>splanchnicus DSM              | 43.4 | 4392288 | absent  |
| Oenococcus oeni PSU-1                        | 37.9 | 1780517 | absent  |
| Oligotropha<br>carboxidovorans OM5           | 62.4 | 3745629 | absent  |

|                                                 |      |         |         |
|-------------------------------------------------|------|---------|---------|
| Olsenella uli DSM 7084                          | 64.7 | 2051896 | absent  |
| Onion yellows                                   | 27.8 | 853092  | absent  |
| Opitutus terrae PB90-1                          | 65.3 | 5957605 | absent  |
| Orientia tsutsugamushi<br>Boryong               | 30.5 | 2127051 | absent  |
| Orientia tsutsugamushi<br>str. Ikeda            | 30.5 | 2008987 | absent  |
| Paenibacillus polymyxa                          | 45.8 | 5394884 | absent  |
| Paenibacillus polymyxa                          | 45.2 | 5731816 | present |
| Paenibacillus sp. JDR-2                         | 50.3 | 7184930 | absent  |
| Paludibacter<br>propionigenes WB4               | 38.9 | 3685504 | absent  |
| Pantoea ananatis LMG                            | 53.7 | 4690298 | absent  |
| Pantoea sp. At-9b                               | 54.8 | 4368708 | present |
| Pantoea vagans C9-1                             | 55.5 | 4024986 | present |
| Parabacteroides<br>distasonis ATCC 8503         | 45.1 | 4811379 | absent  |
| Parachlamydia sp.                               | 34.7 | 2414465 | absent  |
| Paracoccus denitrificans<br>PD1222              | 66.7 | 2852282 | present |
| Paracoccus denitrificans<br>PD1222 chromosome 2 | 66.8 | 1730097 | present |
| Parvibaculum<br>lavamentivorans DS-1            | 62.3 | 3914745 | absent  |
| Parvularcula<br>bermudensis                     | 60.7 | 2902643 | absent  |
| Pasteurella multocida                           | 40.4 | 2257487 | absent  |
| Pectobacterium<br>carotovorum subsp.            | 51.9 | 4862913 | absent  |
| Pectobacterium<br>wasabiae WPP163               | 50.5 | 5063892 | absent  |
| Pediococcus<br>pentosaceus ATCC                 | 37.4 | 1832387 | absent  |
| Pedobacter heparinus<br>DSM 2366                | 42   | 5167383 | absent  |
| Pedobacter saltans<br>DSM 12145                 | 36.6 | 4635236 | absent  |
| Pelagibacter ubique<br>HTCC1062                 | 29.7 | 1308759 | absent  |
| Pelobacter carbinolicus<br>DSM 2380             | 55.1 | 3665893 | absent  |
| Pelobacter propionicus<br>DSM 2379              | 59   | 4008000 | present |
| Pelodictyon luteolum                            | 57.3 | 2364842 | absent  |
| Pelodictyon<br>phaeoclathratiforme              | 48.1 | 3018238 | absent  |
| Pelotomaculum<br>thermopropionicum SI           | 53   | 3025375 | absent  |
| Persephonella marina                            | 37.2 | 1930284 | present |
| Petrogona mobilis SJ95                          | 34.1 | 2169548 | absent  |
| Phenylobacterium<br>zucineum HLK1               | 71.3 | 3996255 | present |
| Photobacterium<br>profundum SS9                 | 42   | 4085304 | present |

|                                                       |      |         |         |
|-------------------------------------------------------|------|---------|---------|
| Photobacterium profundum SS9                          | 41.2 | 2237943 | present |
| Photorhabdus                                          | 42.2 | 5064808 | present |
| Photorhabdus                                          | 42.8 | 5688987 | absent  |
| Pirellula sp.                                         | 55.4 | 7145576 | absent  |
| Pirellula staleyi DSM                                 | 57.5 | 6196199 | absent  |
| Planctomyces brasiliensis DSM 5305                    | 56.4 | 6006602 | absent  |
| Planctomyces limnophilus DSM 3776                     | 53.7 | 5423075 | present |
| Polaromonas naphthalenivorans CJ2                     | 62.5 | 4410291 | present |
| Polaromonas sp. JS666                                 | 62.5 | 5200264 | present |
| Polymorphum gilvum SL003B-26A1                        | 67.2 | 4649365 | present |
| Polynucleobacter necessarius STIR1                    | 45.6 | 1560469 | absent  |
| Polynucleobacter necessarius subsp. asymbioticus QLW- | 44.8 | 2159490 | absent  |
| Porphyromonas asaccharolytica DSM                     | 52.5 | 2186370 | absent  |
| Porphyromonas gingivalis ATCC 33277                   | 48.4 | 2354886 | absent  |
| Porphyromonas gingivalis TDC60                        | 48.3 | 2339898 | absent  |
| Porphyromonas                                         | 48.3 | 2343476 | absent  |
| Prevotella denticola                                  | 50.4 | 2937589 | absent  |
| Prevotella melaninogenica ATCC                        | 40.9 | 1796408 | absent  |
| Prevotella melaninogenica ATCC                        | 41.1 | 1371874 | absent  |
| Prevotella ruminicola                                 | 47.7 | 3619559 | absent  |
| Prochlorococcus marinus CCMP1375                      | 36.4 | 1751080 | absent  |
| Prochlorococcus marinus CCMP1378                      | 30.8 | 1657990 | absent  |
| Prochlorococcus marinus MIT9313                       | 50.7 | 2410873 | absent  |
| Prochlorococcus marinus str. AS9601                   | 31.3 | 1669886 | absent  |
| Prochlorococcus marinus str. MIT 9211                 | 38   | 1688963 | absent  |
| Prochlorococcus marinus str. MIT 9215                 | 31.1 | 1738790 | absent  |
| Prochlorococcus marinus str. MIT 9301                 | 31.3 | 1641879 | absent  |
| Prochlorococcus marinus str. MIT 9303                 | 50   | 2682675 | absent  |
| Prochlorococcus marinus str. MIT 9312                 | 31.2 | 1709204 | absent  |
| Prochlorococcus marinus str. MIT 9515                 | 30.8 | 1704176 | absent  |

|                                                                   |      |         |         |
|-------------------------------------------------------------------|------|---------|---------|
| Prochlorococcus<br>marinus str. NATL1A                            | 35   | 1864731 | absent  |
| Prochlorococcus<br>marinus str. NATL2A                            | 35.1 | 1842899 | absent  |
| Propionibacterium<br>acnes KPA171202                              | 60   | 2560265 | absent  |
| Propionibacterium<br>acnes SK137                                  | 60.1 | 2495334 | absent  |
| Propionibacterium<br>freudenreichii subsp.<br>shermanii CIRM-BIA1 | 67.3 | 2616384 | absent  |
| Prosthecochloris<br>aestuarii DSM 271                             | 50.1 | 2512923 | present |
| Prosthecochloris<br>vibrioformis DSM 265                          | 53   | 1966858 | absent  |
| Proteus mirabilis                                                 | 38.9 | 4063606 | present |
| Pseudoalteromonas<br>atlantica T6c                                | 44.6 | 5187005 | absent  |
| Pseudoalteromonas<br>haloplanktis TAC125                          | 40.2 | 3214944 | absent  |
| Pseudoalteromonas<br>haloplanktis TAC125<br>chromosome II         | 39.4 | 635328  | absent  |
| Pseudoalteromonas sp.<br>SM9913                                   | 40.4 | 3332787 | absent  |
| Pseudoalteromonas sp.<br>SM9913 chromosome II                     | 39.8 | 704884  | absent  |
| Pseudomonas                                                       | 66.6 | 6264404 | absent  |
| Pseudomonas<br>aeruginosa LESB58                                  | 66.3 | 6601757 | absent  |
| Pseudomonas                                                       | 66.4 | 6588339 | absent  |
| Pseudomonas<br>aeruginosa UCBPP-                                  | 66.3 | 6537648 | absent  |
| Pseudomonas<br>brassicacearum subsp.<br>brassicacearum            | 60.8 | 6843248 | absent  |
| Pseudomonas                                                       | 64.2 | 5888780 | absent  |
| Pseudomonas                                                       | 63.3 | 7074893 | absent  |
| Pseudomonas<br>fluorescens PfO-1                                  | 60.5 | 6438405 | absent  |
| Pseudomonas<br>fluorescens SBW25                                  | 60.5 | 6722539 | present |
| Pseudomonas fulva 12-                                             | 63.5 | 4920769 | absent  |
| Pseudomonas<br>mendocina NK-01                                    | 62.5 | 5434353 | absent  |
| Pseudomonas                                                       | 64.7 | 5072807 | absent  |
| Pseudomonas putida F1                                             | 61.9 | 5959964 | absent  |
| Pseudomonas putida                                                | 61.9 | 6078430 | absent  |
| Pseudomonas putida                                                | 61.5 | 6181863 | absent  |
| Pseudomonas putida                                                | 61.4 | 5774330 | absent  |
| Pseudomonas stutzeri                                              | 63.9 | 4567418 | absent  |
| Pseudomonas syringae                                              | 58.4 | 6397126 | absent  |
| Pseudomonas syringae<br>pv. phaseolicola 1448A                    | 58   | 5928787 | present |

|                                                          |      |         |         |
|----------------------------------------------------------|------|---------|---------|
| <i>Pseudomonas syringae</i><br>pv. <i>syringae</i> B728a | 59.2 | 6093698 | absent  |
| <i>Pseudonocardia</i><br><i>dioxanivorans</i> CB1190     | 73.3 | 7096571 | present |
| <i>Pseudoxanthomonas</i><br><i>suwonensis</i> 11-1       | 70.2 | 3419049 | absent  |
| <i>Psychrobacter arcticum</i>                            | 42.8 | 2650701 | absent  |
| <i>Psychrobacter</i><br><i>cryohalolentis</i> K5         | 42.3 | 3059876 | present |
| <i>Psychrobacter</i> sp.                                 | 44.9 | 2978976 | present |
| <i>Psychromonas</i>                                      | 40.1 | 4559598 | absent  |
| <i>Pusillimonas</i> sp. T7-7                             | 56.9 | 3883605 | present |
| <i>Rahnella</i> sp. Y9602                                | 52.3 | 4864217 | present |
| <i>Ralstonia eutropha</i> H16<br>chromosome 1            | 66.5 | 4052032 | absent  |
| <i>Ralstonia eutropha</i> H16<br>chromosome 2            | 66.8 | 2912490 | absent  |
| <i>Ralstonia eutropha</i>                                | 64.7 | 3806533 | present |
| <i>Ralstonia eutropha</i><br>JMP134 chromosome 2         | 65   | 2726152 | present |
| <i>Ralstonia metallidurans</i><br>CH34 chromosome 1      | 63.8 | 3928089 | present |
| <i>Ralstonia metallidurans</i><br>CH34 chromosome 2      | 63.6 | 2580084 | present |
| <i>Ralstonia pickettii</i> 12D                           | 63.6 | 3647724 | present |
| <i>Ralstonia pickettii</i> 12D<br>chromosome 2           | 64.5 | 1323321 | present |
| <i>Ralstonia pickettii</i> 12J                           | 63.4 | 3942557 | present |
| <i>Ralstonia pickettii</i> 12J<br>chromosome 2           | 64.5 | 1302238 | present |
| <i>Ralstonia solanacearum</i><br>CFBP2957                | 66.5 | 3417386 | absent  |
| <i>Ralstonia solanacearum</i>                            | 66.1 | 2085000 | absent  |
| <i>Ralstonia solanacearum</i><br>PSI07 chromosome 2      | 66.4 | 3520618 | absent  |
| <i>Renibacterium</i><br><i>salmoninarum</i> ATCC         | 56.3 | 3155250 | absent  |
| <i>Rhizobium etli</i> CFN 42                             | 61.3 | 4381608 | present |
| <i>Rhizobium etli</i> CIAT                               | 61.7 | 4513324 | present |
| <i>Rhizobium</i><br><i>leguminosarum</i> bv.             | 61.1 | 4767043 | present |
| <i>Rhizobium</i><br><i>leguminosarum</i> bv.             | 61.5 | 4537948 | present |
| <i>Rhizobium</i><br><i>leguminosarum</i> bv.             | 61.1 | 5057142 | present |
| <i>Rhizobium</i> sp. NGR234                              | 63   | 3925702 | present |
| <i>Rhodobacter capsulatus</i><br>SB1003                  | 66.6 | 3738958 | present |
| <i>Rhodobacter</i>                                       | 69   | 3188609 | present |
| <i>Rhodobacter</i><br><i>sphaeroides</i> 2.4.1           | 69   | 943016  | present |
| <i>Rhodobacter</i><br><i>sphaeroides</i> ATCC            | 68.5 | 3217726 | present |

|                                            |      |         |         |
|--------------------------------------------|------|---------|---------|
| Rhodobacter<br>sphaeroides ATCC            | 69.1 | 3147721 | present |
| Rhodobacter<br>sphaeroides ATCC            | 68.6 | 1219053 | present |
| Rhodobacter<br>sphaeroides KD131           | 69.2 | 3152792 | present |
| Rhodobacter<br>sphaeroides KD131           | 68.7 | 1297647 | present |
| Rhodococcus                                | 62.3 | 6516310 | present |
| Rhodococcus jostii                         | 67.5 | 7804765 | present |
| Rhodococcus opacus                         | 67.9 | 7913450 | absent  |
| Rhodoferax                                 | 59.9 | 4712337 | present |
| Rhodomicrobium equis                       | 68.8 | 5043170 | absent  |
| Rhodomicrobium<br>vannielii ATCC 17100     | 62.2 | 4014469 | absent  |
| Rhodopseudomonas<br>palustris BisA53       | 64.4 | 5505494 | absent  |
| Rhodopseudomonas<br>palustris BisB18       | 65   | 5513844 | absent  |
| Rhodopseudomonas<br>palustris BisB5        | 64.8 | 4892717 | absent  |
| Rhodopseudomonas<br>palustris CGA009       | 65   | 5459213 | absent  |
| Rhodopseudomonas<br>palustris DX-1         | 65.4 | 5404117 | absent  |
| Rhodopseudomonas<br>palustris HaA2         | 66   | 5331656 | absent  |
| Rhodopseudomonas<br>palustris TIE-1        | 64.9 | 5744041 | absent  |
| Rhodospirillum                             | 70.5 | 4355548 | absent  |
| Rhodospirillum rubrum<br>ATCC11170         | 65.4 | 4352825 | present |
| Rhodothermus marinus<br>DSM 4252           | 64.5 | 3261604 | present |
| Rickettsia africae ESF-5                   | 32.4 | 1278540 | present |
| Rickettsia akari str.                      | 32.3 | 1231060 | absent  |
| Rickettsia bellii OSU                      | 31.6 | 1528980 | absent  |
| Rickettsia bellii                          | 31.6 | 1522076 | absent  |
| Rickettsia canadensis<br>str. McKiel       | 31.1 | 1159772 | absent  |
| Rickettsia conorii                         | 32.4 | 1268755 | absent  |
| Rickettsia felis                           | 32.5 | 1485148 | present |
| Rickettsia massiliae                       | 32.5 | 1360898 | present |
| Rickettsia peacockii str.                  | 32.6 | 1288492 | present |
| Rickettsia prowazekii<br>strain Madrid E   | 29   | 1111523 | absent  |
| Rickettsia rickettsii str.                 | 32.4 | 1268175 | absent  |
| Rickettsia rickettsii str.<br>Sheila Smith | 32.5 | 1257710 | absent  |
| Rickettsia typhi                           | 28.9 | 1111496 | absent  |
| Riemerella anatipestifer<br>DSM 15868      | 35   | 2155121 | absent  |
| Robiginitalea biformata<br>HTCC2501        | 55.3 | 3530383 | absent  |



|                                                                                        |      |         |         |
|----------------------------------------------------------------------------------------|------|---------|---------|
| Roseiflexus castenholzii<br>DSM 13941                                                  | 60.7 | 5723298 | absent  |
| Roseiflexus sp. RS-1                                                                   | 60.4 | 5801598 | absent  |
| Roseobacter<br>denitrificans OCh 114                                                   | 59   | 4133097 | absent  |
| Rothia dentocariosa<br>ATCC 17931                                                      | 53.7 | 2506025 | absent  |
| Rothia mucilaginosa                                                                    | 59.6 | 2264603 | absent  |
| Rubrobacter<br>xylanophilus DSM                                                        | 70.5 | 3225748 | absent  |
| Ruegeria pomeroyi                                                                      | 64.2 | 4109442 | present |
| Ruminococcus albus 7                                                                   | 44.2 | 3685408 | present |
| Saccharomonospora<br>viridis DSM 43017                                                 | 67.3 | 4308349 | absent  |
| Saccharophagus<br>degradans 2-40                                                       | 45.8 | 5057531 | absent  |
| Saccharopolyspora<br>erythraea NRRL 2338                                               | 71.1 | 8212805 | absent  |
| Salinibacter ruber                                                                     | 66.1 | 3619447 | absent  |
| Salinibacter ruber DSM                                                                 | 66.2 | 3551823 | present |
| Salinispora arenicola                                                                  | 69.5 | 5786361 | absent  |
| Salinispora tropica                                                                    | 69.5 | 5183331 | absent  |
| Salmonella enterica<br>subsp. arizonae serovar                                         | 51.4 | 4600800 | absent  |
| Salmonella enterica<br>subsp. enterica serovar<br>Agona str. SL483                     | 52.1 | 4798660 | present |
| Salmonella enterica<br>subsp. enterica serovar                                         | 52.2 | 4755700 | present |
| Choleraesuis str. SC-<br>Salmonella enterica<br>subsp. enterica serovar<br>Dublin str. | 52.2 | 4842908 | present |
| Salmonella enterica<br>subsp. enterica serovar                                         | 52.2 | 4685848 | absent  |
| Enteritidis str. P125109<br>Salmonella enterica<br>subsp. enterica serovar             | 52.2 | 4658697 | absent  |
| Gallinarum str. 287/91<br>Salmonella enterica<br>subsp. enterica serovar               | 52.1 | 4888768 | present |
| Heidelberg str. SL476<br>Salmonella enterica<br>subsp. enterica serovar                | 52.2 | 4827641 | present |
| Newport str. SL254<br>Salmonella enterica<br>subsp. enterica serovar                   | 52.2 | 4581797 | absent  |
| Paratyphi A str.<br>Salmonella enterica<br>subsp. enterica serovar                     | 52.2 | 4585229 | absent  |
| Paratyphi A str. ATCC<br>Salmonella enterica<br>subsp. enterica serovar                | 52.1 | 4858887 | absent  |
| Paratyphi B str. SPB7                                                                  |      |         |         |

|                                                                                   |      |         |         |
|-----------------------------------------------------------------------------------|------|---------|---------|
| Salmonella enterica<br>subsp. enterica serovar<br>Paratyphi C strain              | 52.2 | 4833080 | present |
| Salmonella enterica<br>subsp. enterica serovar<br>Schwarzengrund str.<br>CVM19633 | 52.2 | 4709075 | present |
| Salmonella enterica<br>subsp. enterica serovar                                    | 52.1 | 4809037 | present |
| Salmonella enterica<br>subsp. enterica serovar                                    | 52.1 | 4791961 | absent  |
| Salmonella enterica<br>subsp. enterica serovar                                    | 52.2 | 4857432 | present |
| Typhimurium LT2                                                                   |      |         |         |
| Sanguibacter keddieii<br>DSM 10542                                                | 71.9 | 4253413 | absent  |
| Sebaldella termitidis<br>ATCC 33386                                               | 33.5 | 4418842 | present |
| Segniliparus rotundus<br>DSM 44985                                                | 66.8 | 3157527 | absent  |
| Selenomonas sputigena<br>ATCC 35185                                               | 57.1 | 2568361 | absent  |
| Serratia proteamaculans                                                           | 55.1 | 5448853 | present |
| Serratia sp. AS12                                                                 | 56   | 5443009 | absent  |
| Serratia sp. AS9                                                                  | 56   | 5442880 | absent  |
| Shewanella                                                                        | 53.6 | 4306142 | absent  |
| Shewanella baltica                                                                | 46.3 | 5127376 | present |
| Shewanella baltica                                                                | 46.3 | 5229686 | present |
| Shewanella baltica                                                                | 46.3 | 5347283 | present |
| Shewanella baltica                                                                | 46.3 | 5145902 | present |
| Shewanella<br>denitrificans OS217                                                 | 45.1 | 4545906 | absent  |
| Shewanella<br>frigidimarina NCIMB                                                 | 41.6 | 4845257 | absent  |
| Shewanella halifaxensis<br>HAW-EB4                                                | 44.6 | 5226917 | absent  |
| Shewanella loihica PV-                                                            | 53.7 | 4602594 | absent  |
| Shewanella oneidensis                                                             | 46   | 4969803 | present |
| Shewanella pealeana<br>ATCC 700345                                                | 44.7 | 5174581 | absent  |
| Shewanella                                                                        | 43.3 | 5396476 | absent  |
| Shewanella putrefaciens<br>CN-32                                                  | 44.5 | 4659220 | absent  |
| Shewanella sediminis<br>HAW-EB3                                                   | 46.1 | 5517674 | absent  |
| Shewanella sp. ANA-3                                                              | 48.1 | 4972204 | present |
| Shewanella sp. MR-4                                                               | 47.9 | 4706287 | absent  |
| Shewanella sp. MR-7                                                               | 47.9 | 4792610 | present |
| Shewanella sp. W3-18-                                                             | 44.6 | 4708380 | absent  |
| Shewanella violacea                                                               | 44.7 | 4962103 | absent  |
| Shewanella woodyi<br>ATCC 51908                                                   | 43.7 | 5935403 | absent  |
| Shigella boydii CDC                                                               | 51.3 | 4615997 | present |
| Shigella boydii Sb227                                                             | 51.2 | 4519823 | present |

|                                                 |      |          |         |
|-------------------------------------------------|------|----------|---------|
| <i>Shigella dysenteriae</i>                     | 51.2 | 4369232  | present |
| <i>Shigella flexneri</i> 2a str                 | 50.9 | 4607203  | present |
| <i>Shigella flexneri</i> 2a str.                | 50.9 | 4599354  | absent  |
| <i>Shigella flexneri</i> 5 str.                 | 50.9 | 4574284  | absent  |
| <i>Shigella sonnei</i> Ss046                    | 51   | 4825265  | present |
| <i>Sideroxydans lithotrophicus</i> ES-1         | 57.5 | 3003656  | absent  |
| <i>Silicibacter</i> sp. TM1040                  | 60.4 | 3200938  | present |
| <i>Sinorhizobium medicae</i> WSM419             | 61.5 | 3781904  | present |
| <i>Sinorhizobium meliloti</i>                   | 62.7 | 3654135  | present |
| <i>Sinorhizobium meliloti</i>                   | 62.7 | 3820344  | present |
| <i>Sinorhizobium meliloti</i> AK83 chromosome 2 | 62.4 | 1680879  | present |
| <i>Sinorhizobium meliloti</i> AK83 chromosome 3 | 60   | 1312480  | present |
| <i>Slackia heliotrinireducens</i> DSM           | 60.2 | 3165038  | absent  |
| <i>Sodalis glossinidius</i> str. morsitans      | 54.7 | 4171146  | present |
| <i>Solibacter usitatus</i>                      | 61.9 | 9965640  | absent  |
| <i>Sorangium cellulosum</i> 'So ce 56'          | 71.4 | 13033779 | absent  |
| <i>Sphaerobacter thermophilus</i> DSM           | 68.1 | 2741033  | absent  |
| <i>Sphaerobacter thermophilus</i> DSM           | 68.1 | 1252731  | absent  |
| <i>Sphingobacterium</i> sp.                     | 41.1 | 6226409  | absent  |
| <i>Sphingobium chlorophenicum</i> L-1           | 63.9 | 3080818  | present |
| <i>Sphingobium chlorophenicum</i> L-1           | 63.6 | 1368670  | present |
| <i>Sphingobium</i>                              | 64.8 | 3514822  | present |
| <i>Sphingobium japonicum</i> UT26S              | 65.9 | 681892   | present |
| <i>Sphingomonas wittichii</i>                   | 68.4 | 5382261  | present |
| <i>Sphingopyxis alaskensis</i> RB2256           | 65.5 | 3345170  | present |
| <i>Spirochaeta coccoides</i> DSM 17374          | 50.6 | 2227296  | absent  |
| <i>Spirochaeta smaragdinae</i> DSM              | 49   | 4653970  | absent  |
| <i>Spirochaeta</i> sp. Buddy                    | 48.9 | 3316466  | absent  |
| <i>Spirochaeta thermophila</i> DSM 6192         | 61.9 | 2472645  | absent  |
| <i>Spirosoma linguale</i>                       | 50.2 | 8078757  | present |
| <i>Stackebrandtia nassauensis</i> DSM           | 68.1 | 6841557  | absent  |
| <i>Staphylococcus aureus</i>                    | 32.8 | 2742531  | absent  |
| <i>Staphylococcus aureus</i> strain Mu50        | 32.9 | 2878529  | present |
| <i>Staphylococcus aureus</i> subsp. aureus COL  | 32.8 | 2809422  | present |

|                                          |      |          |         |
|------------------------------------------|------|----------|---------|
| Staphylococcus aureus subsp. aureus ED98 | 32.8 | 2824404  | present |
| Staphylococcus aureus subsp. aureus JH1  | 33   | 2906507  | present |
| Staphylococcus aureus subsp. aureus JH9  | 32.9 | 2906700  | present |
| Staphylococcus aureus subsp. aureus      | 32.8 | 2902619  | absent  |
| Staphylococcus aureus subsp. aureus      | 32.9 | 2799802  | absent  |
| Staphylococcus aureus subsp. aureus Mu3  | 32.9 | 2880168  | absent  |
| Staphylococcus aureus subsp. aureus MW2  | 32.8 | 2820462  | absent  |
| Staphylococcus aureus subsp. aureus N315 | 32.8 | 2814816  | present |
| Staphylococcus aureus subsp. aureus NCTC | 32.9 | 2821361  | absent  |
| Staphylococcus aureus subsp. aureus str. | 32.9 | 2878897  | absent  |
| Staphylococcus aureus subsp. aureus      | 32.8 | 2872769  | present |
| Staphylococcus aureus subsp. aureus      | 32.8 | 2872915  | present |
| Staphylococcus carnosus subsp.           | 34.6 | 2566424  | absent  |
| Staphylococcus epidermidis               | 32.1 | 2499279  | absent  |
| Staphylococcus epidermidis RP62A         | 32.2 | 2616530  | present |
| Staphylococcus haemolyticus              | 32.8 | 2685015  | absent  |
| Staphylococcus lugdunensis HKU09-01      | 33.9 | 2658366  | absent  |
| Staphylococcus pseudintermedius          | 37.5 | 2617381  | absent  |
| Staphylococcus saprophyticus subsp.      | 33.2 | 2516575  | present |
| Starkeya novella DSM                     | 67.9 | 4765023  | absent  |
| Stenotrophomonas maltophilia K279a       | 66.3 | 4851126  | absent  |
| Stenotrophomonas maltophilia R551-3      | 66.3 | 4573969  | absent  |
| Stigmatella aurantiaca DW4/3-1           | 67.5 | 10260756 | absent  |
| Streptobacillus moniliformis DSM         | 26.3 | 1662578  | present |
| Streptococcus agalactiae 2603V/R         | 35.6 | 2160267  | absent  |
| Streptococcus                            | 35.6 | 2127839  | absent  |
| Streptococcus agalactiae NEM316          | 35.6 | 2211485  | absent  |

|                                                              |      |         |         |
|--------------------------------------------------------------|------|---------|---------|
| Streptococcus<br>dysgalactiae subsp.<br>equisimilis GGS 124  | 39.6 | 2106340 | absent  |
| Streptococcus equi<br>subsp. equi 4047                       | 41.3 | 2253793 | absent  |
| Streptococcus equi<br>subsp. zooepidemicus                   | 41.5 | 2149868 | absent  |
| Streptococcus equi<br>subsp. zooepidemicus<br>str. MGCS10565 | 41.8 | 2024171 | absent  |
| Streptococcus<br>gallolyticus subsp.<br>gallolyticus ATCC    | 37.6 | 2356444 | present |
| Streptococcus<br>gallolyticus UCN34                          | 37.6 | 2350911 | absent  |
| Streptococcus gordonii<br>str. Challis substr. CH1           | 40.5 | 2196662 | absent  |
| Streptococcus mitis B6                                       | 40   | 2146611 | absent  |
| Streptococcus mutans                                         | 36.8 | 2013587 | absent  |
| Streptococcus mutans                                         | 36.8 | 2030921 | absent  |
| Streptococcus oralis                                         | 41.1 | 1958690 | absent  |
| Streptococcus<br>parauberis KCTC                             | 35.5 | 2143887 | absent  |
| Streptococcus<br>pasteurianus ATCC                           | 37.4 | 2100077 | absent  |
| Streptococcus<br>pneumoniae 670-6B                           | 39.6 | 2240045 | absent  |
| Streptococcus<br>pneumoniae 70585                            | 39.7 | 2184682 | absent  |
| Streptococcus<br>pneumoniae AP200                            | 39.5 | 2130580 | absent  |
| Streptococcus<br>pneumoniae ATCC                             | 39.5 | 2221315 | absent  |
| Streptococcus<br>pneumoniae CGSP14                           | 39.5 | 2209198 | absent  |
| Streptococcus<br>pneumoniae D39                              | 39.7 | 2046115 | absent  |
| Streptococcus                                                | 39.7 | 2078953 | absent  |
| Streptococcus<br>pneumoniae                                  | 39.6 | 2245615 | absent  |
| Streptococcus                                                | 39.7 | 2120234 | absent  |
| Streptococcus<br>pneumoniae P1031                            | 39.7 | 2111882 | absent  |
| Streptococcus                                                | 39.7 | 2038615 | absent  |
| Streptococcus<br>pneumoniae                                  | 39.8 | 2112148 | absent  |
| Streptococcus<br>pneumoniae                                  | 39.8 | 2088772 | absent  |
| Streptococcus<br>pneumoniae TIGR4                            | 39.7 | 2160842 | absent  |
| Streptococcus pyogenes<br>M1 GAS                             | 38.5 | 1852441 | absent  |
| Streptococcus pyogenes<br>MGAS10270                          | 38.4 | 1928252 | absent  |

|                                             |      |          |         |
|---------------------------------------------|------|----------|---------|
| Streptococcus pyogenes<br>MGAS10394         | 38.7 | 1899877  | absent  |
| Streptococcus pyogenes<br>MGAS10750         | 38.3 | 1937111  | absent  |
| Streptococcus pyogenes<br>MGAS2096          | 38.7 | 1860355  | absent  |
| Streptococcus pyogenes<br>MGAS315           | 38.6 | 1900521  | absent  |
| Streptococcus pyogenes<br>MGAS5005          | 38.5 | 1838554  | absent  |
| Streptococcus pyogenes<br>MGAS6180          | 38.4 | 1897573  | absent  |
| Streptococcus pyogenes<br>MGAS9429          | 38.5 | 1836467  | absent  |
| Streptococcus pyogenes<br>NZ131             | 38.6 | 1815785  | absent  |
| Streptococcus pyogenes                      | 38.6 | 1894275  | absent  |
| Streptococcus pyogenes<br>str. Manfredo     | 38.6 | 1841271  | absent  |
| Streptococcus pyogenes<br>strain MGAS8232   | 38.5 | 1895017  | absent  |
| Streptococcus sanguinis                     | 43.4 | 2388435  | absent  |
| Streptococcus suis                          | 41.1 | 2096309  | absent  |
| Streptococcus suis                          | 41.1 | 2095698  | absent  |
| Streptococcus suis                          | 41.1 | 2146229  | present |
| Streptococcus suis P1/7                     | 41.3 | 2007491  | absent  |
| Streptococcus suis                          | 41.1 | 2095898  | absent  |
| Streptococcus suis ST3                      | 41.3 | 2028815  | absent  |
| Streptococcus<br>thermophilus               | 39.1 | 1796226  | absent  |
| Streptococcus<br>thermophilus LMD-9         | 39.1 | 1856368  | present |
| Streptococcus<br>thermophilus LMG           | 39.1 | 1796846  | absent  |
| Streptococcus uberis                        | 36.6 | 1852352  | absent  |
| Streptomyces<br>avermitilis MA-4680         | 70.7 | 9025608  | present |
| Streptomyces coelicolor                     | 72.1 | 8667507  | present |
| Streptomyces griseus<br>subsp. griseus NBRC | 72.2 | 8545929  | absent  |
| Streptomyces scabiei                        | 71.5 | 10148695 | absent  |
| Streptosporangium<br>roseum DSM 43021       | 70.9 | 10341314 | present |
| Sulfuricurvum kujiense<br>DSM 16994         | 45   | 2574824  | present |
| Sulfurihydrogenibium<br>azorense Az-Fu1     | 32.8 | 1640877  | absent  |
| Sulfurihydrogenibium<br>sp. YO3AOP1         | 32   | 1838442  | absent  |
| Sulfurimonas<br>autotrophica DSM            | 35.2 | 2153198  | absent  |
| Sulfurospirillum<br>deleyianum DSM 6946     | 39   | 2306351  | absent  |
| Sulfurovum sp. NBC37-                       | 43.9 | 2562277  | absent  |

|                                             |      |         |         |
|---------------------------------------------|------|---------|---------|
| Symbiobacterium thermophilum IAM            | 68.7 | 3566135 | absent  |
| Synechococcus elongatus PCC 6301            | 55.5 | 2696255 | absent  |
| Synechococcus elongatus PCC 7942            | 55.5 | 2695903 | present |
| Synechococcus sp.                           | 52.4 | 2606748 | absent  |
| Synechococcus sp.                           | 59.2 | 2510659 | absent  |
| Synechococcus sp.                           | 54.2 | 2234828 | absent  |
| Synechococcus sp. JA-2-3B'a(2-13)           | 58.5 | 3046682 | absent  |
| Synechococcus sp. JA-                       | 60.2 | 2932766 | absent  |
| Synechococcus sp. PCC                       | 49.6 | 3008047 | present |
| Synechococcus sp.                           | 60.8 | 2224914 | absent  |
| Synechococcus sp. WH                        | 60.2 | 2366980 | absent  |
| Synechococcus sp.                           | 59.4 | 2434428 | absent  |
| Synechocystis sp. PCC                       | 47.7 | 3573470 | absent  |
| Syntrophobacter fumaroxidans MPOB           | 59.9 | 4990251 | absent  |
| Syntrophobotulus glycolicus DSM 8271        | 46.4 | 3406739 | absent  |
| Syntrophomonas wolfei subsp. wolfei str.    | 44.9 | 2936195 | absent  |
| Syntrophothermus lipocalidus DSM 12680      | 51   | 2405559 | absent  |
| Syntrophus                                  | 51.5 | 3179300 | absent  |
| Taylorella equigenitalis                    | 37.4 | 1695860 | absent  |
| Tepidanaerobacter sp.                       | 37.5 | 2759867 | absent  |
| Teredinibacter turnerae                     | 50.9 | 5193164 | absent  |
| Terriglobus saanensis                       | 57.3 | 5095226 | absent  |
| Thauera sp. MZ1T                            | 68.4 | 4496212 | present |
| Thermaerobacter marianensis DSM             | 72.5 | 2844696 | absent  |
| Thermanaerovibrio acidaminovorans DSM       | 63.8 | 1848474 | absent  |
| Thermincola sp. JR                          | 45.9 | 3157416 | absent  |
| Thermoanaerobacter brockii subsp. finnii    | 34.5 | 2344824 | absent  |
| Thermoanaerobacter italicus Ab9             | 34.1 | 2451061 | absent  |
| Thermoanaerobacter mathranii subsp.         | 34.3 | 2306092 | absent  |
| Thermoanaerobacter pseudethanolicus         | 34.5 | 2362816 | absent  |
| Thermoanaerobacter sp.                      | 34.5 | 2456520 | absent  |
| Thermoanaerobacter sp.                      | 34.5 | 2457259 | absent  |
| Thermoanaerobacter tengcongensis strain     | 37.6 | 2689445 | absent  |
| Thermoanaerobacterium m                     | 34.1 | 2785752 | absent  |
| thermosaccharolyticum                       |      |         |         |
| Thermoanaerobacterium m xylanolyticum LX-11 | 35   | 2534358 | absent  |

|                                                  |      |         |         |
|--------------------------------------------------|------|---------|---------|
| Thermobaculum terrenum ATCC BAA-                 | 48.1 | 2026947 | absent  |
| Thermobaculum terrenum ATCC BAA-798 chromosome 2 | 63.8 | 1074634 | absent  |
| Thermobifida fusca YX                            | 67.5 | 3642249 | absent  |
| Thermobispora bispora DSM 43833                  | 72.4 | 4189976 | absent  |
| Thermocrinis albus DSM 14484                     | 46.9 | 1500577 | absent  |
| Thermodesulfobium narugense DSM 14796            | 33.9 | 1898865 | absent  |
| Thermodesulfovibrio yellowstonii DSM             | 34.1 | 2003803 | absent  |
| Thermomicrobium roseum DSM 5159                  | 63.6 | 2003006 | present |
| Thermomonospora curvata DSM 43183                | 71.6 | 5639016 | absent  |
| Thermosediminibacter oceani DSM 16646            | 46.8 | 2280035 | absent  |
| Thermosipho africanus TCF52B                     | 30.8 | 2016657 | absent  |
| Thermosipho melanesiensis BI429                  | 31.4 | 1915238 | absent  |
| Thermosynechococcus elongatus BP-1               | 53.9 | 2593857 | absent  |
| Thermotoga lettingae                             | 38.7 | 2135342 | absent  |
| Thermotoga maritima                              | 46.2 | 1860725 | absent  |
| Thermotoga naphthophila RKU-10                   | 46.1 | 1809823 | absent  |
| Thermotoga neapolitana DSM 4359                  | 46.9 | 1884562 | absent  |
| Thermotoga petrophila                            | 46.1 | 1823511 | absent  |
| Thermotoga sp. RQ2                               | 46.2 | 1877693 | absent  |
| Thermovibrio ammonificans HB-1                   | 52.1 | 1682965 | present |
| Thermus scotoductus                              | 64.9 | 2346803 | present |
| Thermus thermophilus                             | 69.4 | 1894877 | present |
| Thermus thermophilus                             | 69.5 | 1849742 | present |
| Thioalkalimicrobium cyclicum ALM1                | 47   | 1932455 | absent  |
| Thioalkalivibrio sp. HL-                         | 65.1 | 3464554 | absent  |
| Thioalkalivibrio sp.                             | 65.9 | 2744800 | absent  |
| Thiobacillus denitrificans ATCC                  | 66.1 | 2909809 | absent  |
| Thiomicrospira crunogena XCL-2                   | 43.1 | 2427734 | absent  |
| Thiomicrospira denitrificans ATCC                | 34.5 | 2201561 | absent  |
| Thiomonas intermedia                             | 63.9 | 3396378 | present |
| Tolomonas auensis                                | 49   | 3471292 | absent  |
| Treponema azotonutricium ZAS-9                   | 49.8 | 3855671 | absent  |



|                                                |      |         |         |
|------------------------------------------------|------|---------|---------|
| Treponema<br>brennaborensis DSM                | 51.5 | 3055580 | absent  |
| Treponema denticola<br>ATCC 35405              | 37.9 | 2843201 | absent  |
| Treponema pallidum                             | 52.8 | 1138011 | absent  |
| Treponema pallidum<br>subsp. pallidum SS14     | 52.8 | 1139457 | absent  |
| Treponema primitia                             | 50.8 | 4059867 | absent  |
| Treponema<br>succinifaciens DSM                | 39.2 | 2731853 | present |
| Trichodesmium<br>erythraeum IMS101             | 34.1 | 7750108 | absent  |
| Tropheryma whipplei                            | 46.3 | 925938  | absent  |
| Tropheryma whipplei                            | 46.3 | 927303  | absent  |
| Truepera radiovictrix<br>DSM 17093             | 68.1 | 3260398 | absent  |
| Tsukamurella<br>paurometabola DSM              | 68.4 | 4379918 | present |
| Ureaplasma parvum<br>serovar 3 str. ATCC       | 25.5 | 751679  | absent  |
| Ureaplasma urealyticum                         | 25.5 | 751719  | absent  |
| Ureaplasma urealyticum<br>serovar 10 str. ATCC | 25.8 | 874478  | absent  |
| Variovorax paradoxus                           | 66.5 | 6550056 | absent  |
| Variovorax paradoxus                           | 67.6 | 5626353 | absent  |
| Variovorax paradoxus<br>S110 chromosome 2      | 67   | 1128644 | absent  |
| Veillonella parvula                            | 38.6 | 2132142 | absent  |
| Verminephrobacter<br>eiseniae EF01-2           | 65.3 | 5566749 | present |
| Verrucosispora maris<br>AB-18-032              | 70.9 | 6673976 | present |
| Vibrio anguillarum 775                         | 44.6 | 3063912 | absent  |
| Vibrio anguillarum 775<br>chromosome II        | 44.1 | 988135  | absent  |
| Vibrio cholerae                                | 47.7 | 2961149 | absent  |
| Vibrio cholerae                                | 46.9 | 1072315 | absent  |
| Vibrio cholerae M66-2                          | 47.8 | 2892523 | absent  |
| Vibrio cholerae M66-2<br>chromosome II         | 47   | 1046382 | absent  |
| Vibrio cholerae MJ-                            | 47.5 | 3149584 | absent  |
| Vibrio cholerae MJ-<br>1236 chromosome 2       | 46.7 | 1086784 | absent  |
| Vibrio cholerae O395<br>chromosome 1           | 46.9 | 1108250 | absent  |
| Vibrio cholerae O395<br>chromosome 2           | 47.8 | 3024069 | absent  |
| Vibrio fischeri ES114                          | 39   | 2897536 | absent  |
| Vibrio fischeri ES114<br>chromosome II         | 37   | 1330333 | absent  |
| Vibrio fischeri MJ11                           | 38.9 | 2905029 | present |
| Vibrio fischeri MJ11<br>chromosome II          | 37.2 | 1418848 | present |

|                                          |      |         |         |
|------------------------------------------|------|---------|---------|
| Vibrio harveyi ATCC BAA-1116             | 45.5 | 3765351 | present |
| Vibrio harveyi ATCC BAA-1116 chromosome  | 45.3 | 2204018 | present |
| Vibrio parahaemolyticus                  | 45.4 | 3288558 | absent  |
| Vibrio parahaemolyticus                  | 45.4 | 1877212 | absent  |
| Vibrio sp. Ex25                          | 44.9 | 3259580 | absent  |
| Vibrio sp. Ex25                          | 44.9 | 1829445 | absent  |
| Vibrio splendidus                        | 44   | 3299302 | absent  |
| Vibrio splendidus LGP32 chromosome 2     | 43.6 | 1675519 | absent  |
| Vibrio vulnificus                        | 46.4 | 3281944 | absent  |
| Vibrio vulnificus CMCP6 chromosome II    | 47.1 | 1844853 | absent  |
| Vibrio vulnificus MO6-                   | 46.7 | 3194232 | absent  |
| Vibrio vulnificus MO6-24/O chromosome II | 47.4 | 1813536 | absent  |
| Vibrio vulnificus YJ016                  | 46.4 | 3354505 | present |
| Vibrio vulnificus YJ016 chromosome II    | 47.2 | 1857073 | present |
| Waddlia chondrophila WSU 86-1044         | 43.8 | 2116312 | present |
| Weeksella virosa DSM                     | 35.9 | 2272954 | absent  |
| Wigglesworthia                           | 22.5 | 697724  | absent  |
| Wolbachia endosymbiont of Culex          | 34.2 | 1482455 | absent  |
| Wolbachia endosymbiont of                | 35.2 | 1267782 | absent  |
| Wolbachia endosymbiont strain            | 34.2 | 1080084 | absent  |
| Wolbachia sp. wRi                        | 35.2 | 1445873 | absent  |
| Wolinella succinogenes                   | 48.5 | 2110355 | absent  |
| Xanthobacter autotrophicus Py2           | 67.5 | 5308934 | present |
| Xanthomonas                              | 63   | 3768695 | absent  |
| Xanthomonas axonopodis pv. citri str.    | 64.8 | 5175554 | absent  |
| Xanthomonas campestris pv.               | 65   | 5079002 | absent  |
| Xanthomonas campestris pv.               | 65   | 5148708 | absent  |
| Xanthomonas campestris pv.               | 65.1 | 5076188 | absent  |
| Xanthomonas campestris pv.               | 64.7 | 5178466 | present |
| Xanthomonas oryzae pv. oryzae KACC10331  | 63.7 | 4941439 | absent  |
| Xanthomonas oryzae pv. oryzae MAFF       | 63.7 | 4940217 | absent  |
| Xanthomonas oryzae pv. oryzae PXO99A     | 63.6 | 5240075 | absent  |
| Xenorhabdus bovienii                     | 45   | 4225498 | absent  |

|                                                  |      |         |         |
|--------------------------------------------------|------|---------|---------|
| Xenorhabdus<br>nematophila ATCC                  | 44.2 | 4432590 | present |
| Xylanimonas<br>cellulosilytica DSM               | 72.5 | 3742776 | present |
| Xylella fastidiosa                               | 51.8 | 2519802 | present |
| Xylella fastidiosa 9a5c                          | 52.7 | 2679306 | present |
| Xylella fastidiosa M12                           | 51.9 | 2475130 | absent  |
| Xylella fastidiosa M23                           | 51.8 | 2535690 | present |
| Yersinia enterocolitica<br>subsp. enterocolitica | 47.3 | 4615899 | present |
| Yersinia enterocolitica<br>subsp. palearctica    | 47   | 4552107 | present |
| Yersinia pestis Angola                           | 47.6 | 4504254 | present |
| Yersinia pestis Antiqua                          | 47.7 | 4702289 | present |
| Yersinia pestis biovar<br>Microtus str. 91001    | 47.7 | 4595065 | present |
| Yersinia pestis KIM                              | 47.6 | 4600755 | absent  |
| Yersinia pestis                                  | 47.6 | 4534590 | present |
| Yersinia pestis                                  | 47.6 | 4517345 | present |
| Yersinia pestis strain                           | 47.6 | 4653728 | present |
| Yersinia pestis Z176003                          | 47.7 | 4553586 | present |
| Yersinia<br>pseudotuberculosis IP                | 47.5 | 4723306 | present |
| Yersinia<br>pseudotuberculosis IP                | 47.6 | 4744671 | present |
| Yersinia<br>pseudotuberculosis                   | 47.5 | 4695619 | present |
| Yersinia<br>pseudotuberculosis                   | 47.5 | 4689441 | absent  |
| Zunongwangia<br>profunda SM-A87                  | 36.2 | 5128187 | absent  |
| Zymomonas mobilis<br>subsp. mobilis NCIB         | 46.8 | 2124771 | present |
| Zymomonas mobilis<br>subsp. mobilis ZM4          | 46.3 | 2056416 | absent  |
