# Supplementary material for: Comparative Analyses of Base Compositions, DNA Sizes, and Dinucleotide Frequency Profiles in Archaeal and Bacterial Chromosomes and Plasmids
Source: PubMed Central journal article supplement (PMC3321278; doi:10.1155/2012/342482), 2012-03-26
Supplement: 342482.f4.pdf [file 342482.f4.pdf]

Supplementary Table S4. Archaeal chromosomes compared in this analysis.

| Organism                                   | GC content (%) | Chromosome size (bp) | Plasmid |
|--------------------------------------------|----------------|----------------------|---------|
| <i>Acidianus hospitalis</i> W1             | 34.1           | 2137654              | absent  |
| <i>Acidilobus saccharovorans</i> 345-15    | 57.2           | 1496453              | absent  |
| <i>Aciduliprofundum</i>                    | 39.2           | 1486778              | absent  |
| <i>Aeropyrum pernix</i>                    | 56.3           | 1669696              | absent  |
| <i>Archaeoglobus fulgidus</i>              | 48.6           | 2178400              | absent  |
| <i>Archaeoglobus profundus</i> DSM 5631    | 42             | 1560622              | presnet |
| <i>Archaeoglobus</i>                       | 47             | 1901943              | absent  |
| <i>Caldivirga</i>                          | 43.1           | 2077567              | absent  |
| <i>Candidatus Korarchaeum</i>              | 49             | 1590757              | absent  |
| <i>Candidatus Methanoregula boonei</i>     | 54.5           | 2542943              | absent  |
| <i>Candidatus Methanosphaerula</i>         | 55.4           | 2922917              | absent  |
| <i>Cenarchaeum</i>                         | 57.4           | 2045086              | absent  |
| <i>Desulfurococcus kamchatkensis</i> 1221n | 45.3           | 1365223              | absent  |
| <i>Desulfurococcus mucosus</i> DSM 2162    | 53.1           | 1314639              | absent  |
| <i>Ferroglobus placidus</i>                | 44.1           | 2196266              | absent  |
| <i>Halalkalicoccus jeotgali</i>            | 65             | 2809118              | presnet |
| <i>Haloarcula marismortui</i> ATCC 43049   | 62.4           | 3131724              | presnet |
| <i>Haloarcula marismortui</i> ATCC 43049   | 57.2           | 288050               | present |
| <i>Halobacterium</i>                       | 68             | 2000962              | present |
| <i>Halobacterium</i> sp.                   | 67.9           | 2014239              | present |
| <i>Haloferax volcanii</i> DS2              | 66.6           | 2847757              | present |
| <i>Halogeometricum borinquense</i> DSM     | 61.1           | 2820544              | present |
| <i>Halomicrobium mukohataei</i> DSM 12286  | 65.6           | 3110487              | present |
| <i>Halopiger xanaduensis</i>               | 66             | 3668009              | present |
| <i>Haloquadratum walsbyi</i> DSM 16790     | 47.9           | 3132494              | present |
| <i>Halorhabdus utahensis</i> DSM 12940     | 62.9           | 3116795              | absent  |
| <i>Halorubrum lacusprofundi</i> ATCC       | 66.7           | 2735295              | present |
| <i>Halorubrum lacusprofundi</i> ATCC       | 57.1           | 525943               | present |
| <i>Haloterrigena turkmenica</i> DSM 5511   | 65.8           | 3889038              | present |
| <i>Hyperthermus butylicus</i> DSM 5456     | 53.7           | 1667163              | absent  |
| <i>Ignicoccus hospitalis</i>               | 56.5           | 1297538              | absent  |
| <i>Ignisphaera aggregans</i> DSM 17230     | 35.7           | 1875953              | absent  |
| <i>Metallosphaera cuprina</i>              | 42             | 1840348              | absent  |

|                                                 |      |         |         |
|-------------------------------------------------|------|---------|---------|
| Metallosphaera sedula<br>DSM 5348               | 46.2 | 2191517 | absent  |
| Methanobacterium sp.                            | 35.8 | 2583753 | absent  |
| Methanobacterium sp.                            | 35.7 | 2546541 | absent  |
| Methanobrevibacter<br>ruminantium M1            | 32.6 | 2937203 | absent  |
| Methanobrevibacter<br>smithii ATCC 35061        | 31   | 1853160 | absent  |
| Methanocaldococcus<br>fervens AG86              | 32.2 | 1485061 | present |
| Methanocaldococcus<br>infernus ME               | 33.6 | 1328194 | absent  |
| Methanocaldococcus sp.<br>FS406-22              | 32   | 1760939 | present |
| Methanocaldococcus<br>vulcanius M7              | 31.5 | 1746329 | present |
| Methanocella paludicola                         | 54.9 | 2957635 | absent  |
| Methanococcoides<br>burtonii DSM 6242           | 40.8 | 2575032 | absent  |
| Methanococcus aeolicus<br>Nankai-3              | 30   | 1569500 | absent  |
| Methanococcus                                   | 31.4 | 1664970 | present |
| Methanococcus<br>maripaludis (strain S2)        | 33.1 | 1661137 | absent  |
| Methanococcus                                   | 33   | 1780761 | present |
| Methanococcus                                   | 33.4 | 1744193 | absent  |
| Methanococcus                                   | 33.3 | 1772694 | absent  |
| Methanococcus                                   | 31.3 | 1720048 | absent  |
| Methanococcus voltae                            | 28.6 | 1936387 | absent  |
| Methanocorpusculum<br>labreanum Z               | 50   | 1804962 | absent  |
| Methanoculleus                                  | 62.1 | 2478101 | absent  |
| Methanohalobium<br>evestigatum Z-7303           | 36.6 | 2242317 | present |
| Methanohalophilus<br>mahii DSM 5219             | 42.6 | 2012424 | absent  |
| Methanoplanus<br>petrolearius DSM 11571         | 47.4 | 2843290 | absent  |
| Methanopyrus kandleri                           | 61.2 | 1694969 | absent  |
| Methanosaeta concilii                           | 51   | 3008626 | present |
| Methanosaeta                                    | 53.5 | 1879471 | absent  |
| Methanosarcina<br>acetivorans str. C2A          | 42.7 | 5751492 | absent  |
| Methanosarcina barkeri<br>str. fusaro           | 39.3 | 4837408 | present |
| Methanosarcina mazei<br>strain Goe1             | 41.5 | 4096345 | absent  |
| Methanosphaera<br>stadtmanae DSM 3091           | 27.6 | 1767403 | absent  |
| Methanospirillum                                | 45.1 | 3544738 | absent  |
| Methanothermobacter<br>marburgensis str.        | 48.6 | 1634695 | present |
| Methanothermobacter<br>thermoautotrophicus str. | 49.5 | 1751377 | absent  |

|                                         |      |         |         |
|-----------------------------------------|------|---------|---------|
| Methanothermococcus<br>okinawensis IH1  | 29.3 | 1662525 | present |
| Methanothermus<br>fervidus DSM 2088     | 31.6 | 1243342 | absent  |
| Methanotorris igneus                    | 32.3 | 1854197 | absent  |
| Nanoarchaeum equitans                   | 31.6 | 490885  | absent  |
| Natrialba magadii                       | 61.4 | 3751858 | presnet |
| Natronomonas<br>pharaonis DSM 2160      | 63.4 | 2595221 | present |
| Nitrosopumilus                          | 34.2 | 1645259 | absent  |
| Picrophilus torridus                    | 36   | 1545895 | absent  |
| Pyrobaculum                             | 51.4 | 2222430 | absent  |
| Pyrobaculum<br>arsenaticum DSM          | 55.1 | 2121076 | absent  |
| Pyrobaculum<br>calidifontis JCM 11548   | 57.2 | 2009313 | absent  |
| Pyrobaculum<br>islandicum DSM 4184      | 49.6 | 1826402 | absent  |
| Pyrococcus abyssi                       | 44.7 | 1765118 | absent  |
| Pyrococcus furiosus                     | 40.8 | 1908256 | absent  |
| Pyrococcus horikoshii                   | 41.9 | 1738505 | absent  |
| Pyrococcus sp. NA2                      | 42.7 | 1861320 | absent  |
| Staphylothermus<br>hellenicus DSM 12710 | 36.8 | 1580347 | absent  |
| Staphylothermus                         | 35.7 | 1570485 | absent  |
| Sulfolobus<br>acidocaldarius DSM        | 36.7 | 2225959 | absent  |
| Sulfolobus islandicus                   | 35.3 | 2722032 | present |
| Sulfolobus islandicus                   | 35.1 | 2736272 | absent  |
| Sulfolobus islandicus                   | 35.1 | 2608832 | absent  |
| Sulfolobus islandicus                   | 35   | 2692402 | absent  |
| Sulfolobus islandicus                   | 35   | 2586647 | absent  |
| Sulfolobus islandicus                   | 35.4 | 2702058 | absent  |
| Sulfolobus islandicus                   | 35.3 | 2812165 | present |
| Sulfolobus solfataricus                 | 35.8 | 2992245 | absent  |
| Sulfolobus tokodaii                     | 32.8 | 2694756 | absent  |
| Thermococcus                            | 41.8 | 2010078 | absent  |
| Thermococcus<br>gammatolerans EJ3       | 53.6 | 2045438 | absent  |
| Thermococcus<br>kodakaraensis KOD1      | 52   | 2088737 | absent  |
| Thermococcus                            | 51.3 | 1847607 | absent  |
| Thermococcus sibiricus                  | 40.2 | 1845800 | absent  |
| Thermofilum pendens                     | 57.7 | 1781889 | absent  |
| Thermoplasma                            | 46   | 1564906 | absent  |
| Thermoplasma                            | 39.9 | 1584804 | absent  |
| Thermoproteus<br>neutrophilus V24Sta    | 59.9 | 1769823 | absent  |
| Thermoproteus                           | 59.7 | 1936063 | absent  |
| Thermosphaera<br>aggregans DSM 11486    | 46.7 | 1316595 | absent  |
| Uncultured<br>methanogenic archaeon     | 54.6 | 3179916 | absent  |

|                                      |      |         |        |
|--------------------------------------|------|---------|--------|
| Vulcanisaeta distributa<br>DSM 14429 | 45.4 | 2374137 | absent |
| Vulcanisaeta<br>moutnovskia 768-28   | 42.4 | 2298983 | absent |
